# Supplementary material for: Synthesis and stability of small molecule probes for Pseudomonas aeruginosa quorum sensing modulation
Source: Royal Society of Chemistry journal article supplement (doi:10.1039/b412802h), 2004-01-01
Supplement: b412802h.pdf [file b412802h.pdf]

I-69/2

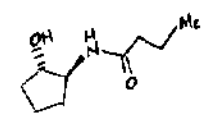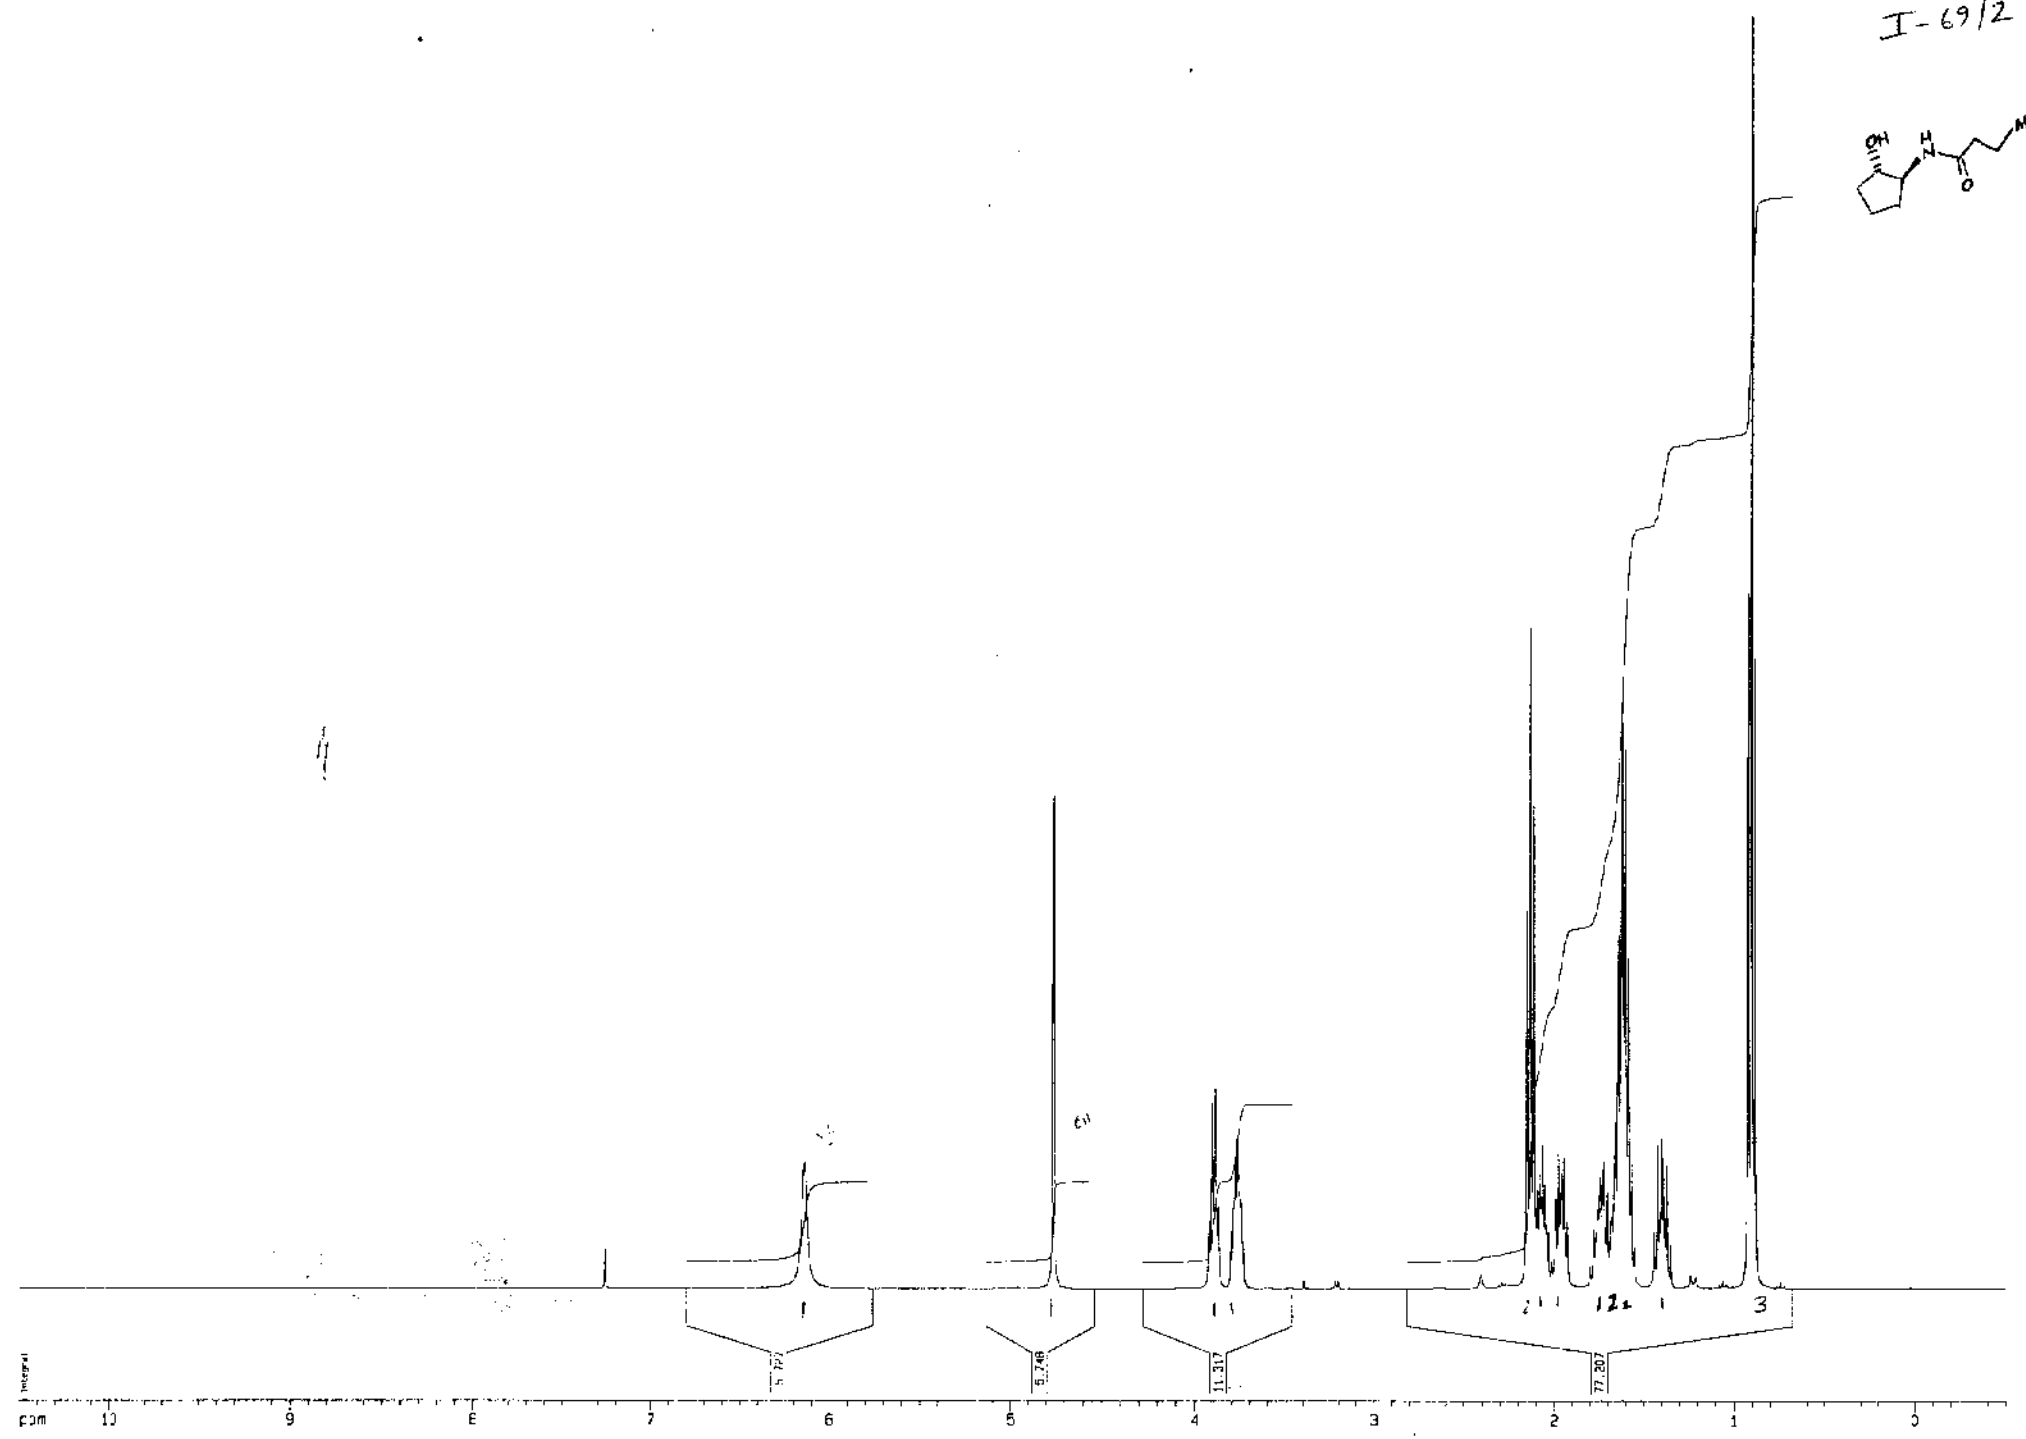

Integral

10 9 8 7 6 5 4 3 2 1 0

ppm

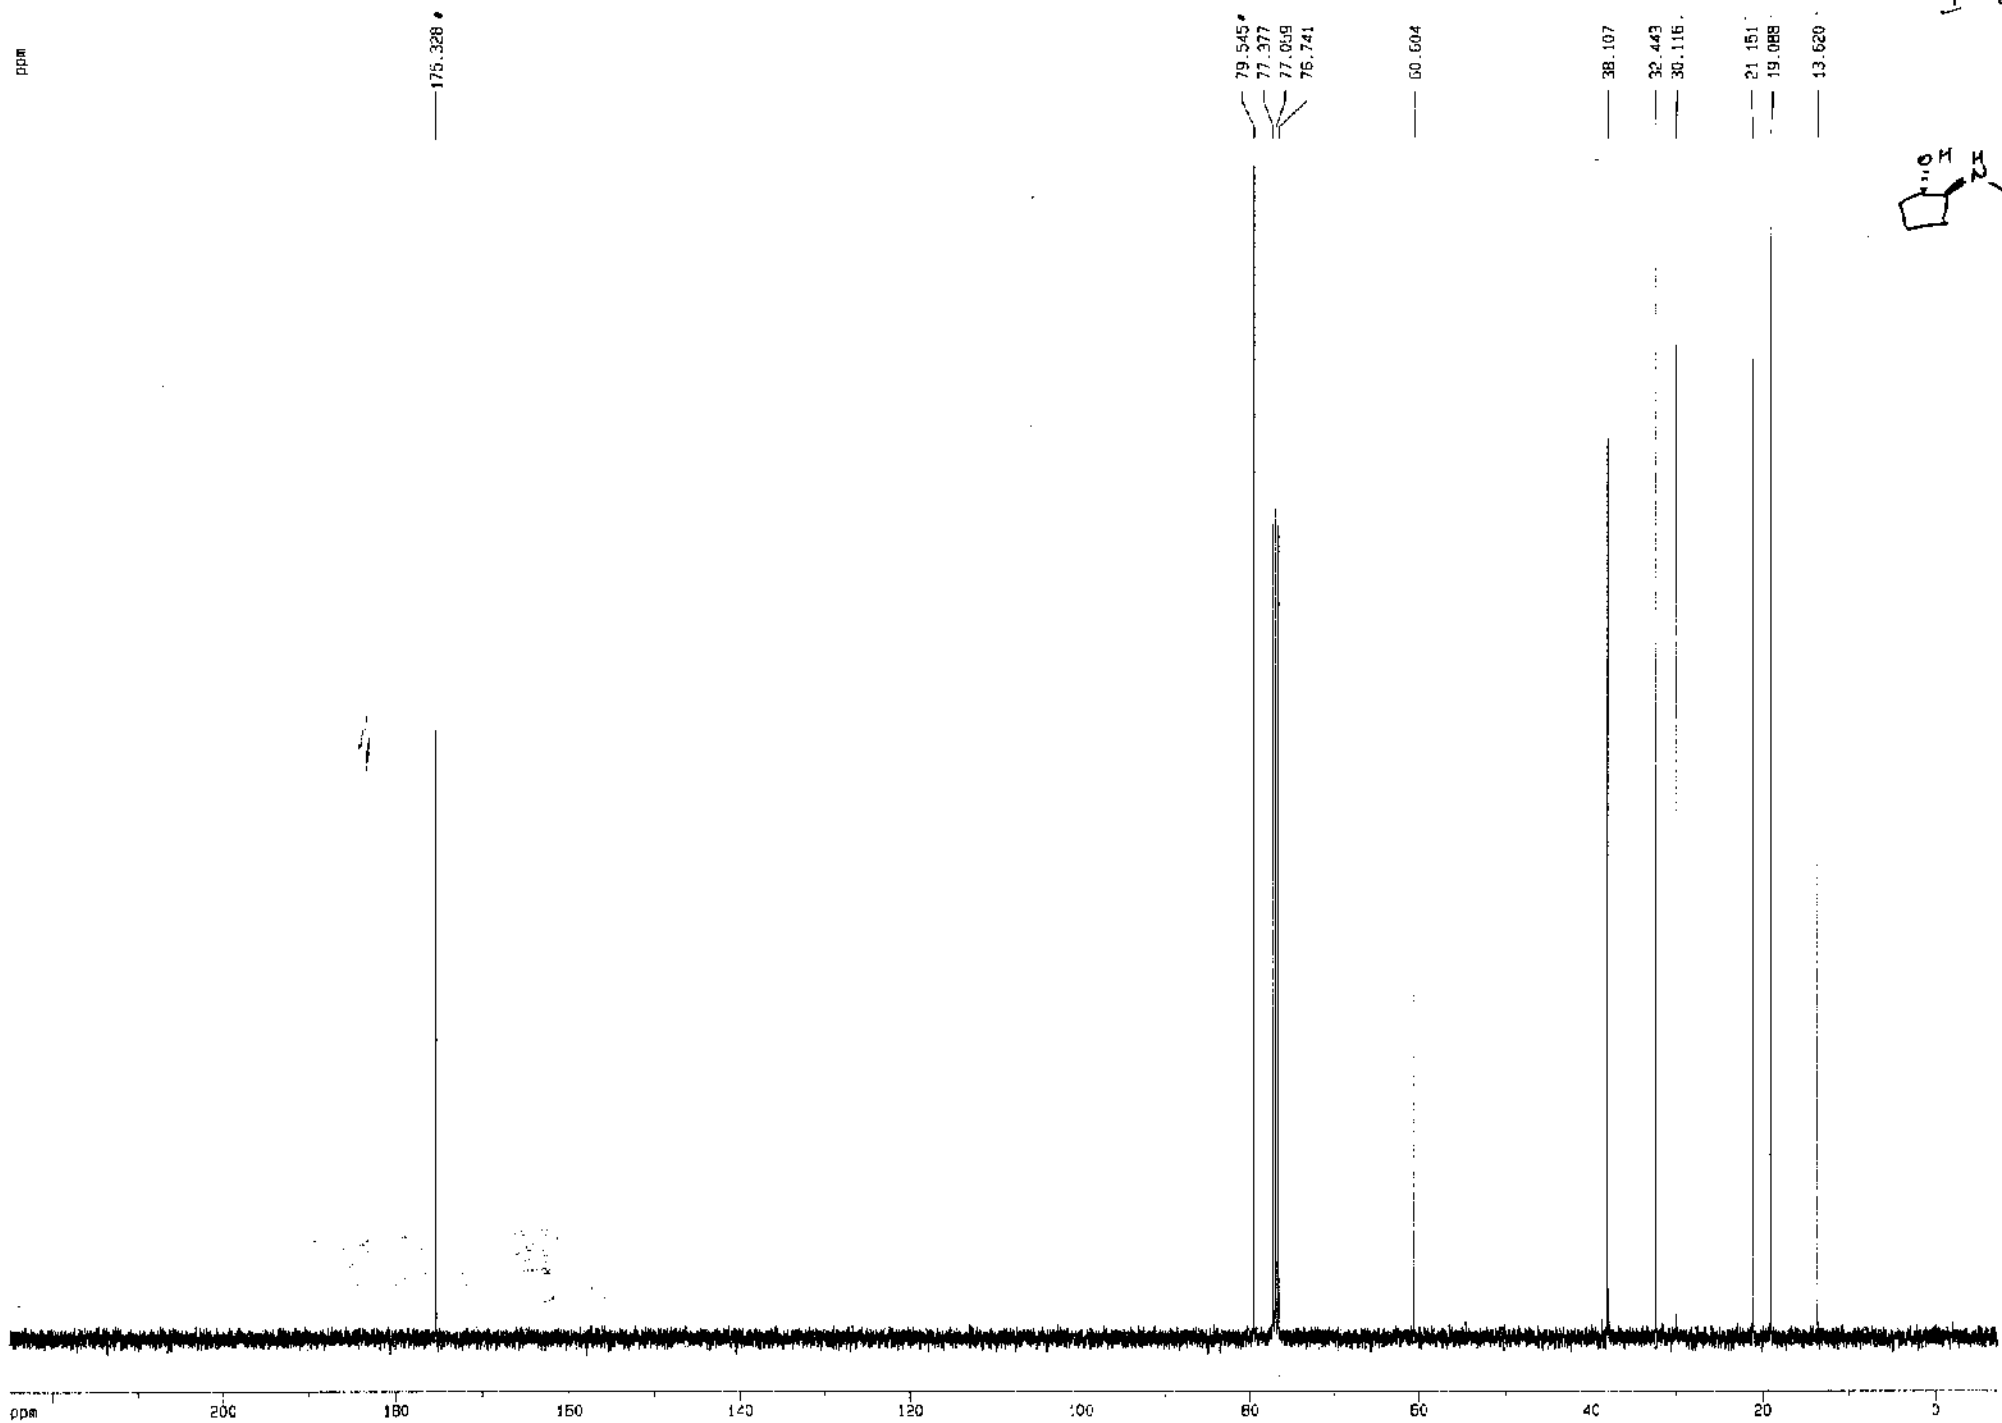

I-69/2

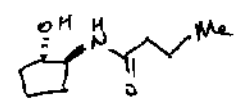

I-69/2

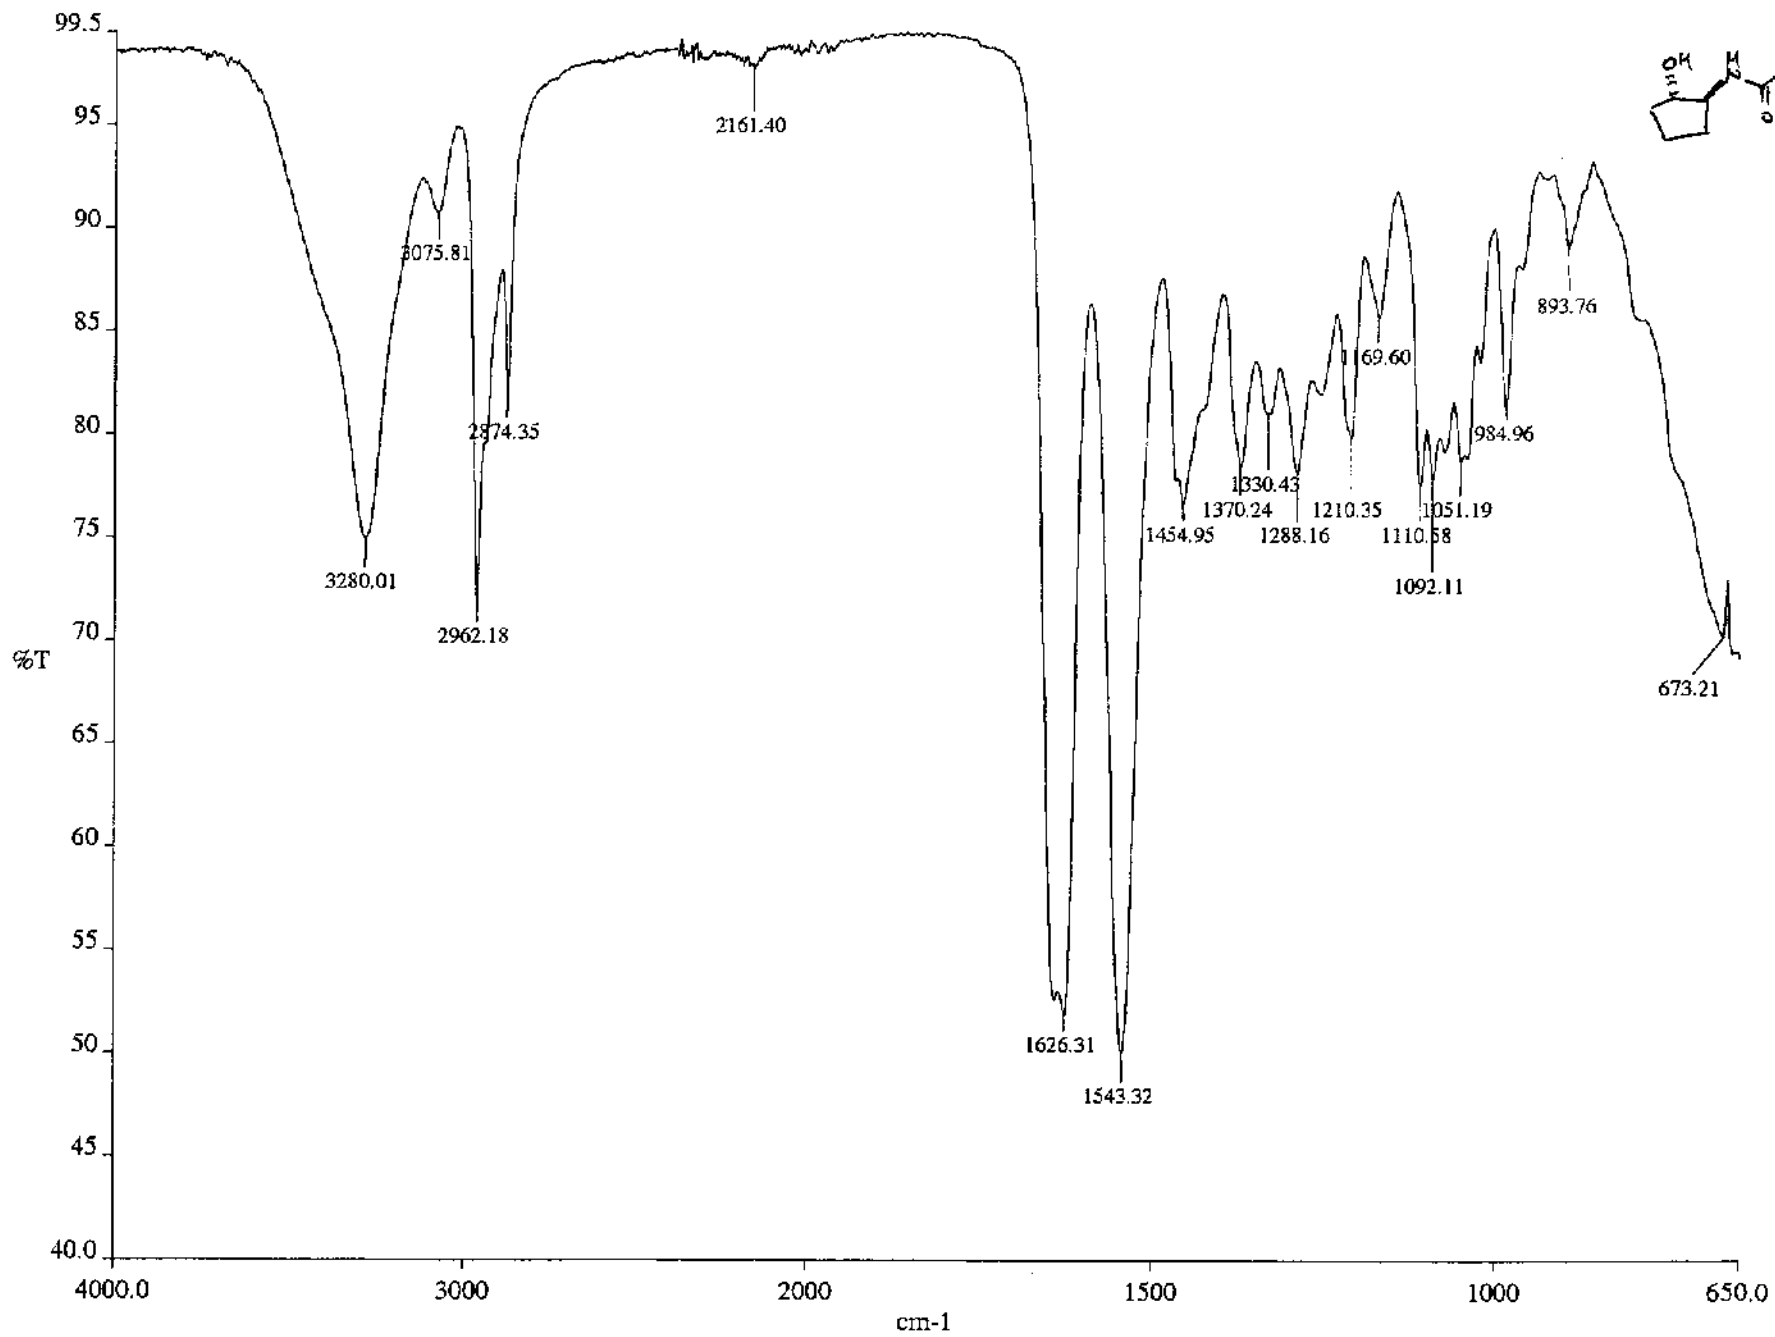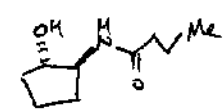

proton.std CDCl3 {d:\data\drs} dss29 11

*get expansion!*

BHL

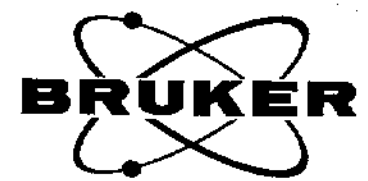

Current Data Parameters  
 NAME I1592  
 EXPNO 11  
 PROCNO 1

F2 - Acquisition Parameters  
 Date\_ 20040325  
 Time 7.14  
 INSTRUM AV500  
 PROBHD 5 mm BBO BB-1H  
 PULPROG zg30  
 TD 65536  
 SOLVENT CDCl3  
 NS 16  
 DS 2  
 SWH 10330.578 Hz  
 FIDRES 0.157632 Hz  
 AQ 3.1720407 sec  
 RG 128  
 DW 48.400 usec  
 DE 6.00 usec  
 TE 300.0 K  
 D1 1.00000000 sec

==== CHANNEL f1 =====  
 NUC1 1H  
 P1 10.75 usec  
 PL1 -3.00 dB  
 SFO1 500.2030689 MHz

F2 - Processing parameters  
 SI 131072  
 SF 500.2000334 MHz  
 WDW EM  
 SSB 0  
 LB 0.30 Hz  
 GB 0  
 PC 1.00

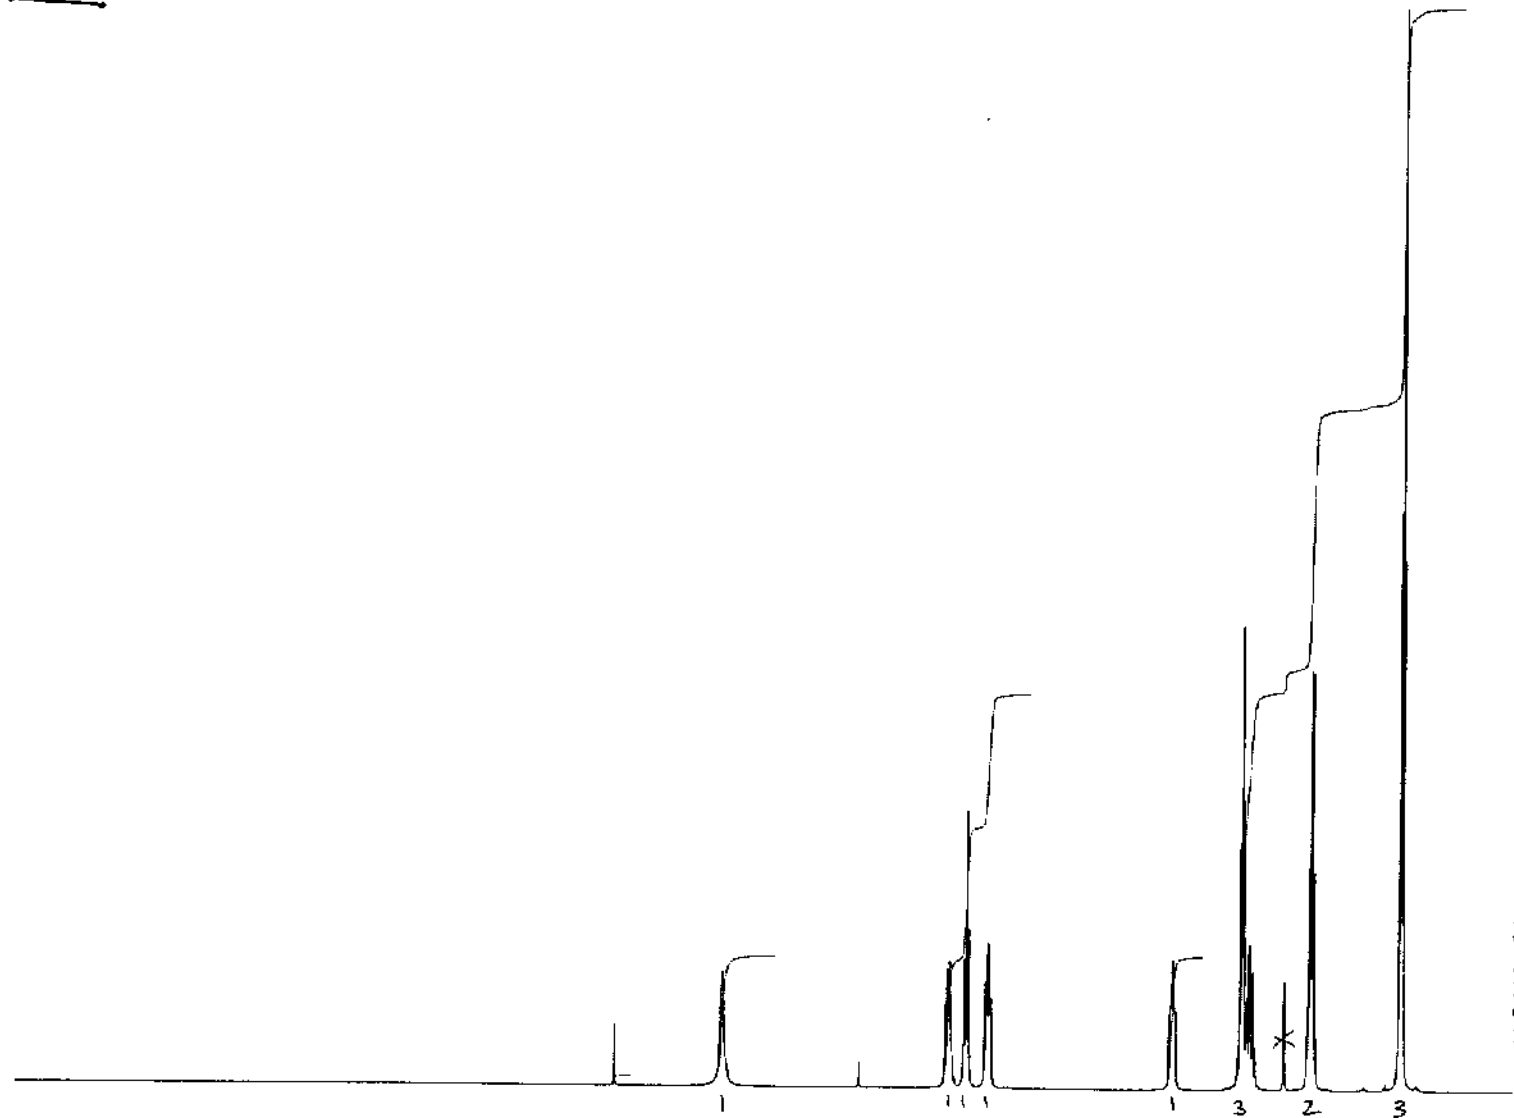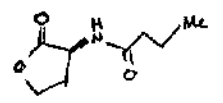

0.54  
 7.46  
 22.51  
 7.59  
 61.90

.std CDC13 {d:\data\drs} dss29 11

175.74  
173.69

~~77.29~~  
~~77.04~~  
~~76.78~~  
66.07  
49.05  
37.96  
30.27  
18.86  
13.63

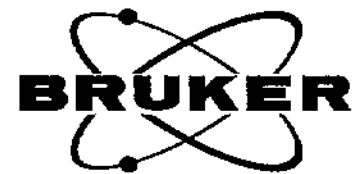

BAL

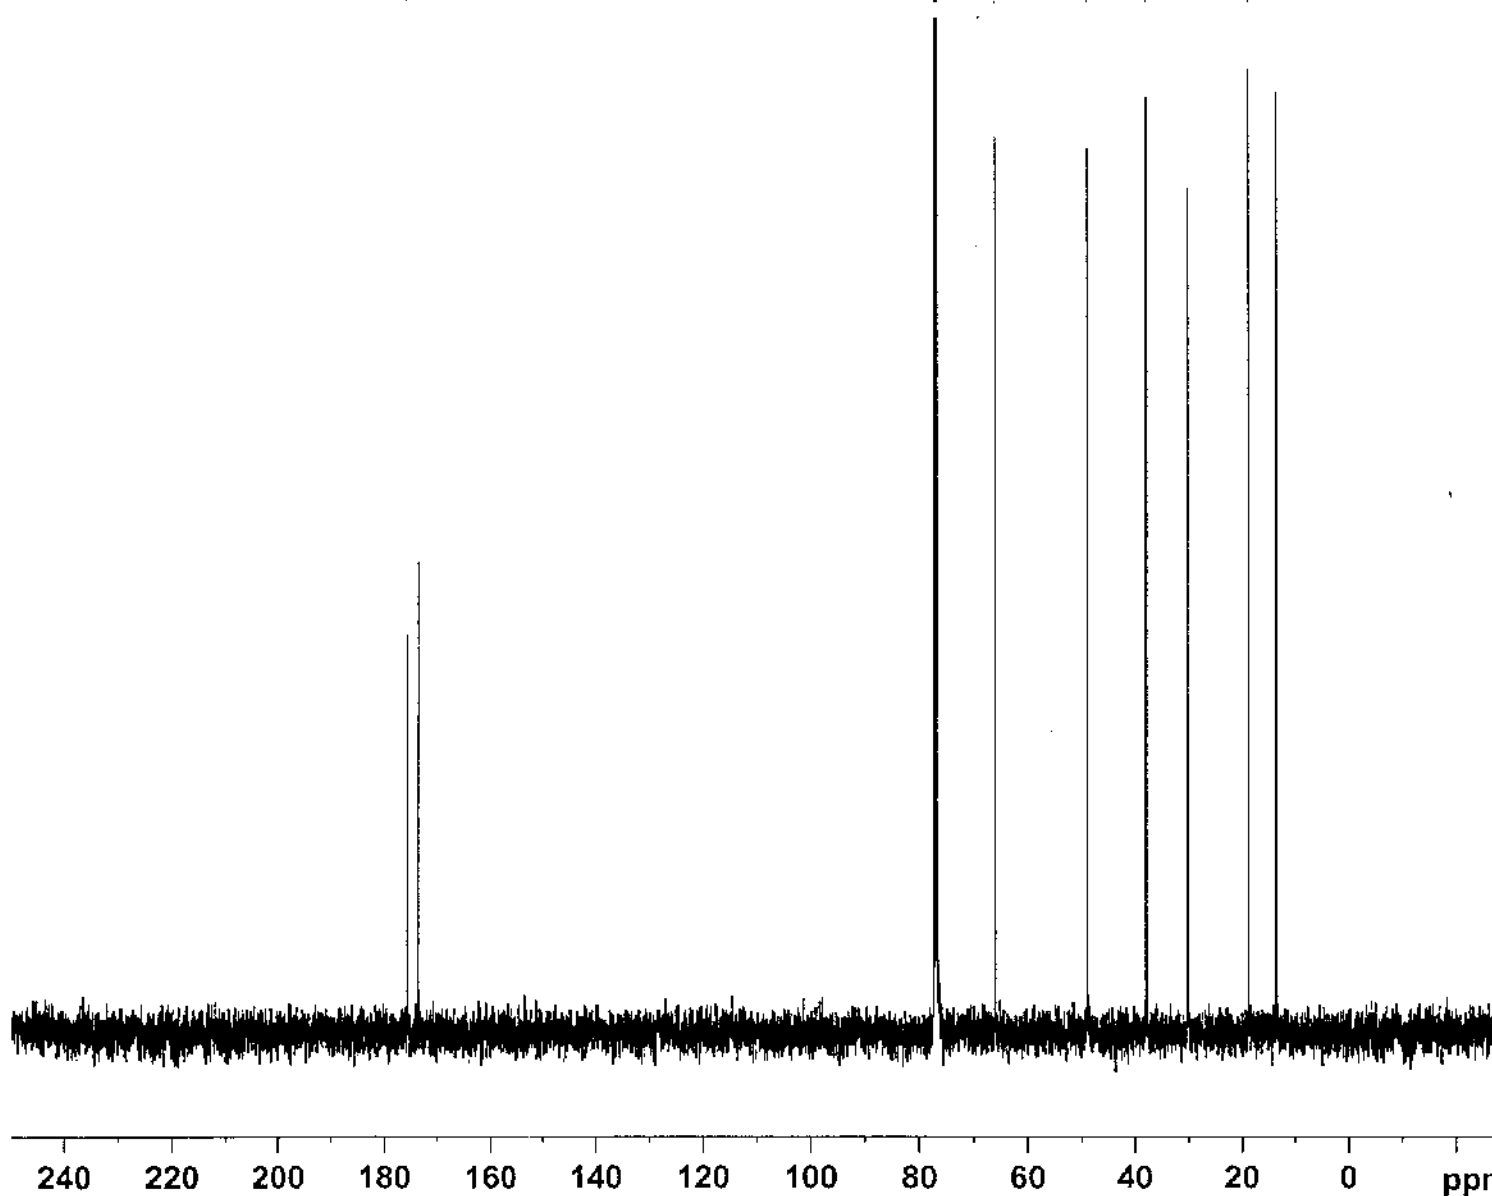

Current Data Parameters  
NAME I1592  
EXPNO 10  
PROCNO 1

F2 - Acquisition Parameters  
Date\_ 20040325  
Time 7.11  
INSTRUM AV500  
PROBHD 5 mm BBO BB-1H  
PULPROG zgpg30  
TD 65536  
SOLVENT CDC13  
NS 100  
DS 4  
SWH 35211.270 Hz  
FIDRES 0.537281 Hz  
AQ 0.9306754 sec  
RG 23170.5  
DW 14.200 usec  
DE 6.00 usec  
TE 300.0 K  
D1 4.00000000 sec  
d11 0.03000000 sec  
d12 0.00002000 sec

==== CHANNEL f1 =====  
NUC1 13C  
P1 8.45 usec  
PL1 4.00 dB  
SFO1 125.7892253 MHz

==== CHANNEL f2 =====  
CPDPRG2 waltz16  
NUC2 1H  
PCPD2 65.00 usec  
PL2 -3.00 dB  
PL12 13.00 dB  
PL13 13.00 dB  
SFO2 500.2020008 MHz

F2 - Processing parameters  
SI 65536  
SF 125.7753900 MHz  
WDW EM  
SSB 0  
LB 2.00 Hz  
GB 0  
PC 1.40

BKL  
I-159/2

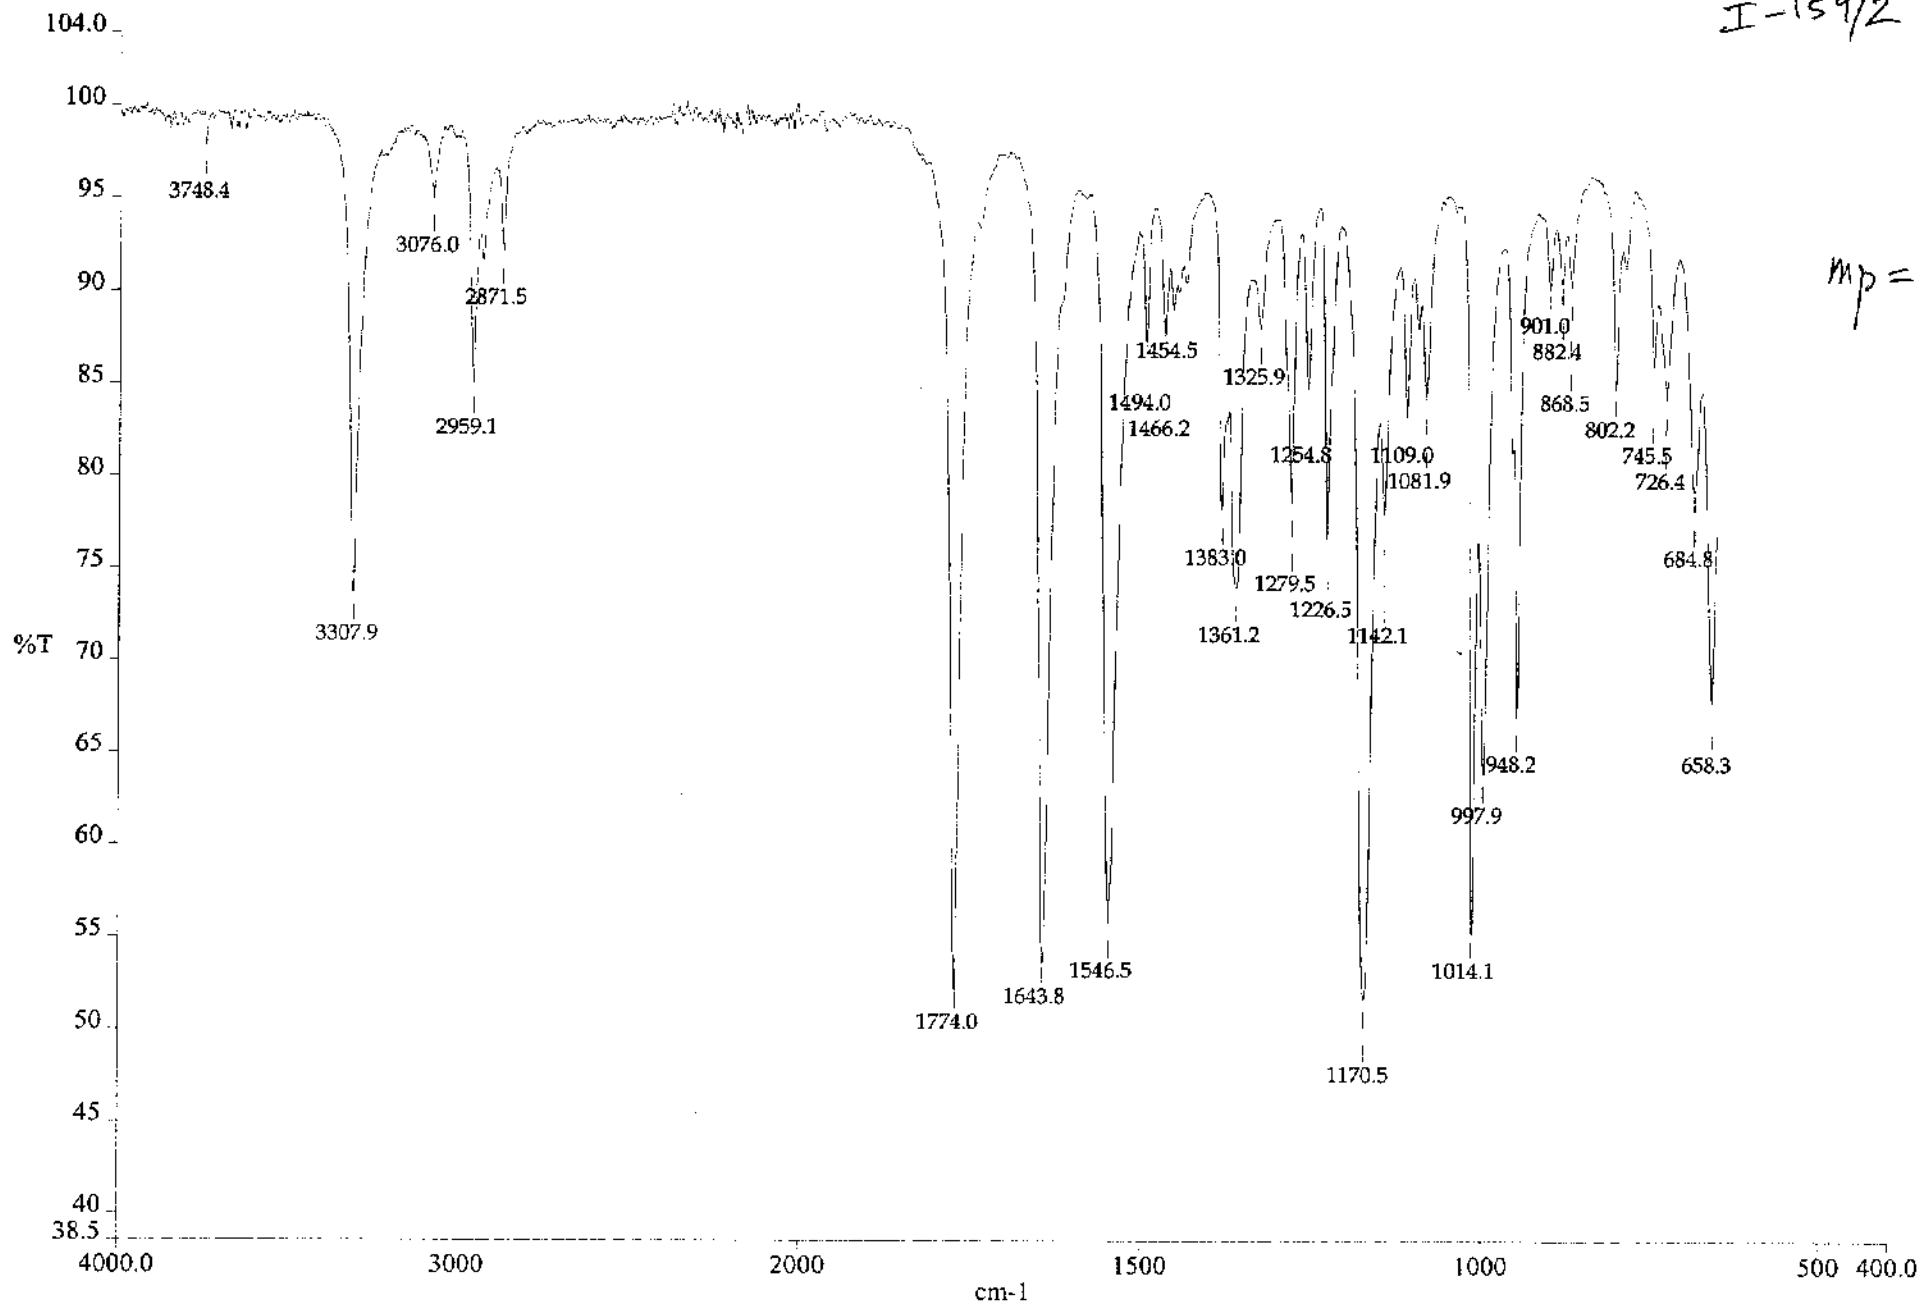

mp = 127-92

I-70/2

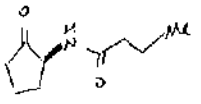

H=15

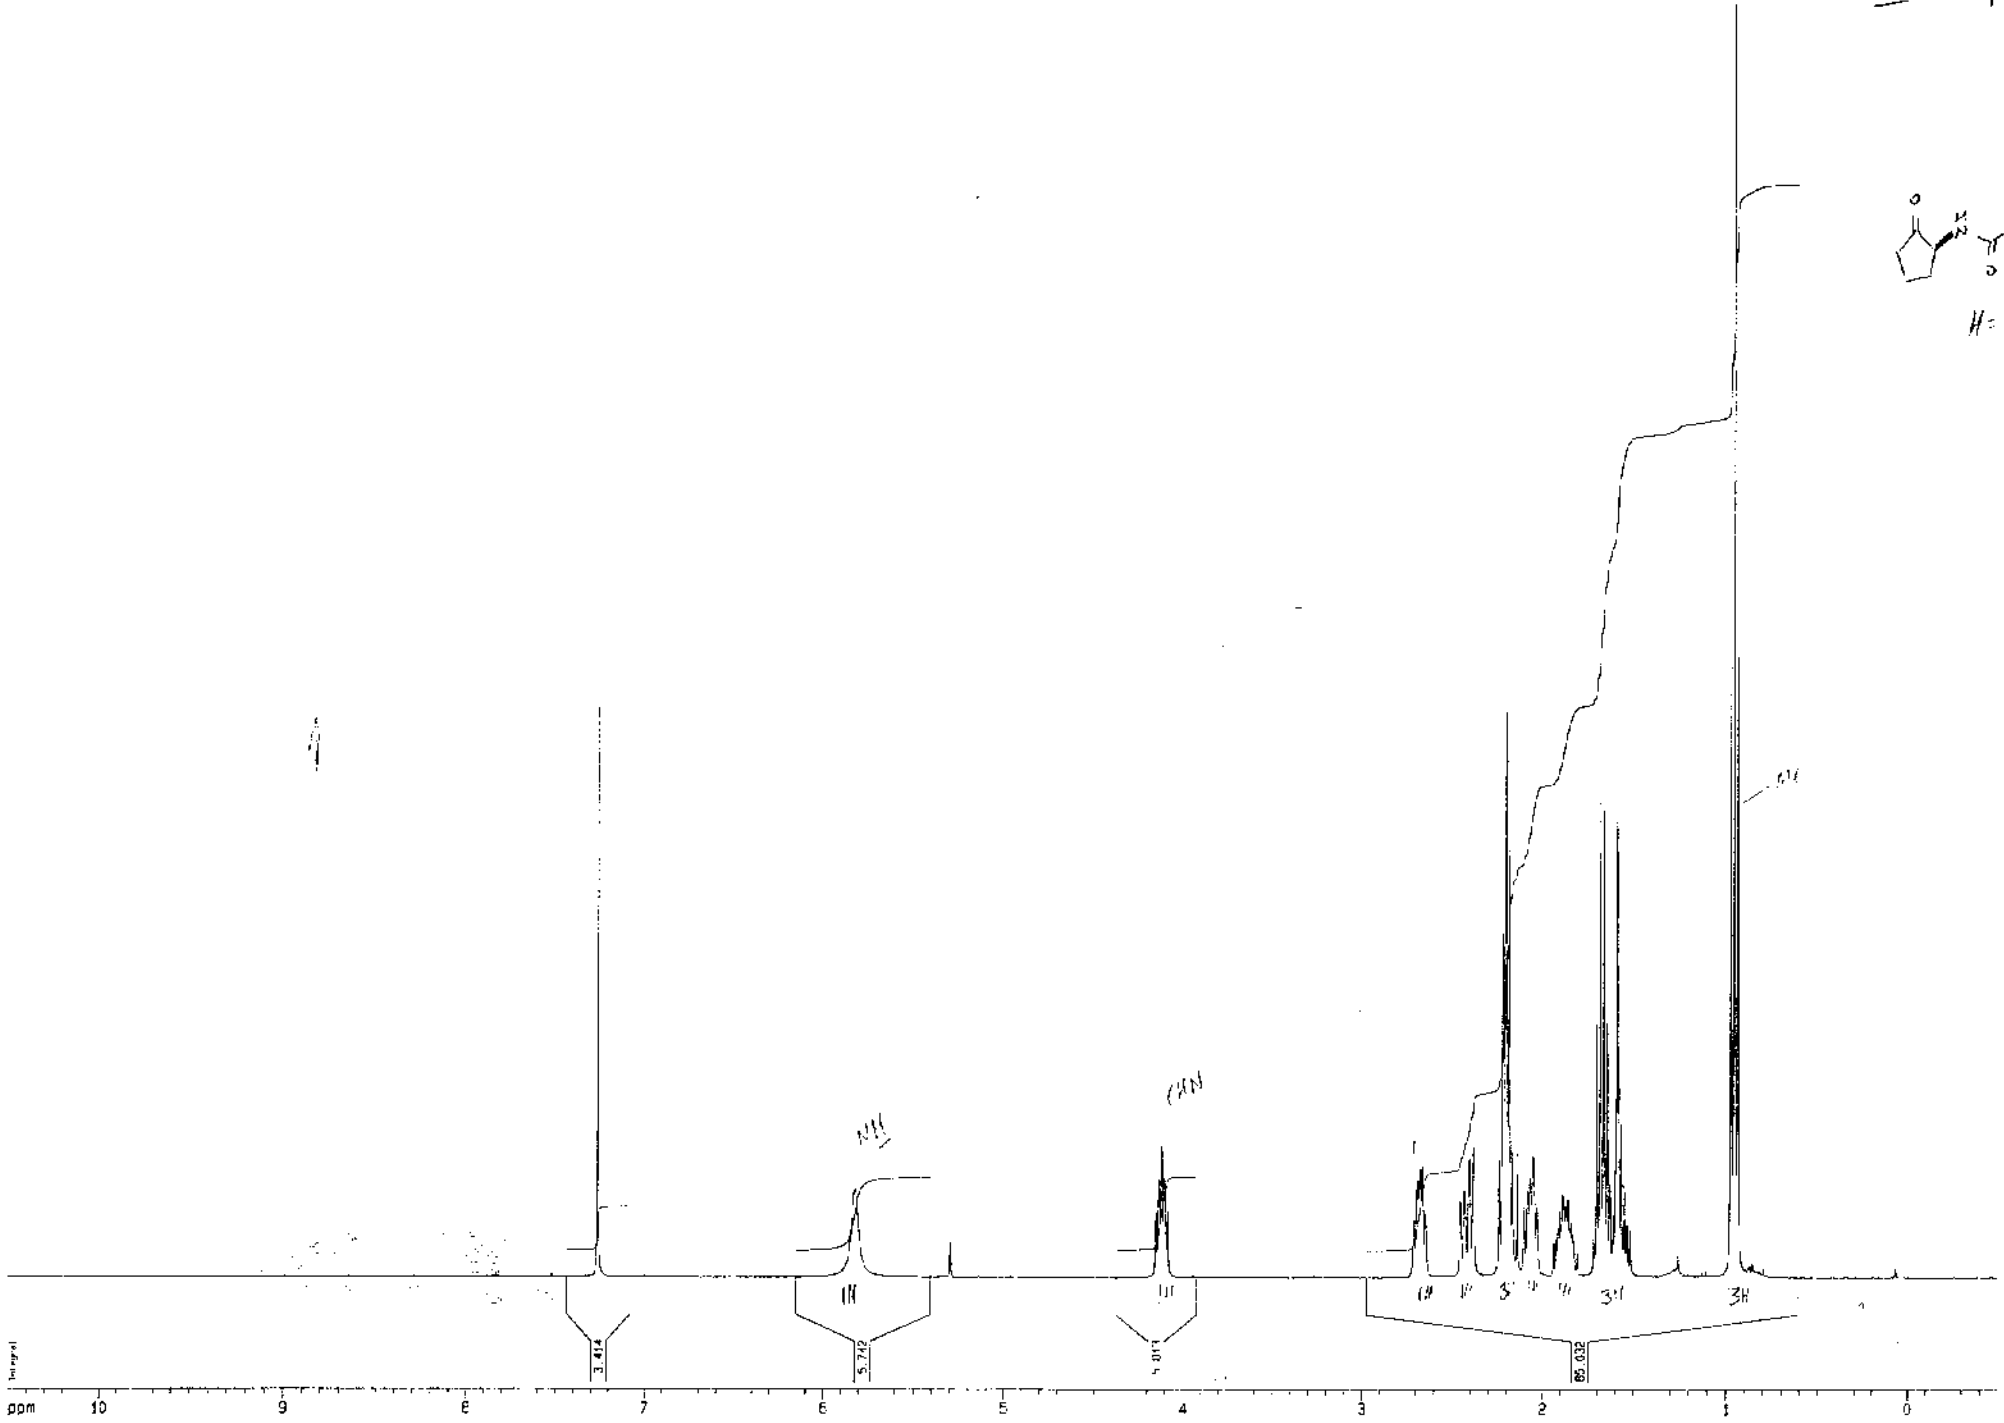

I-70/2

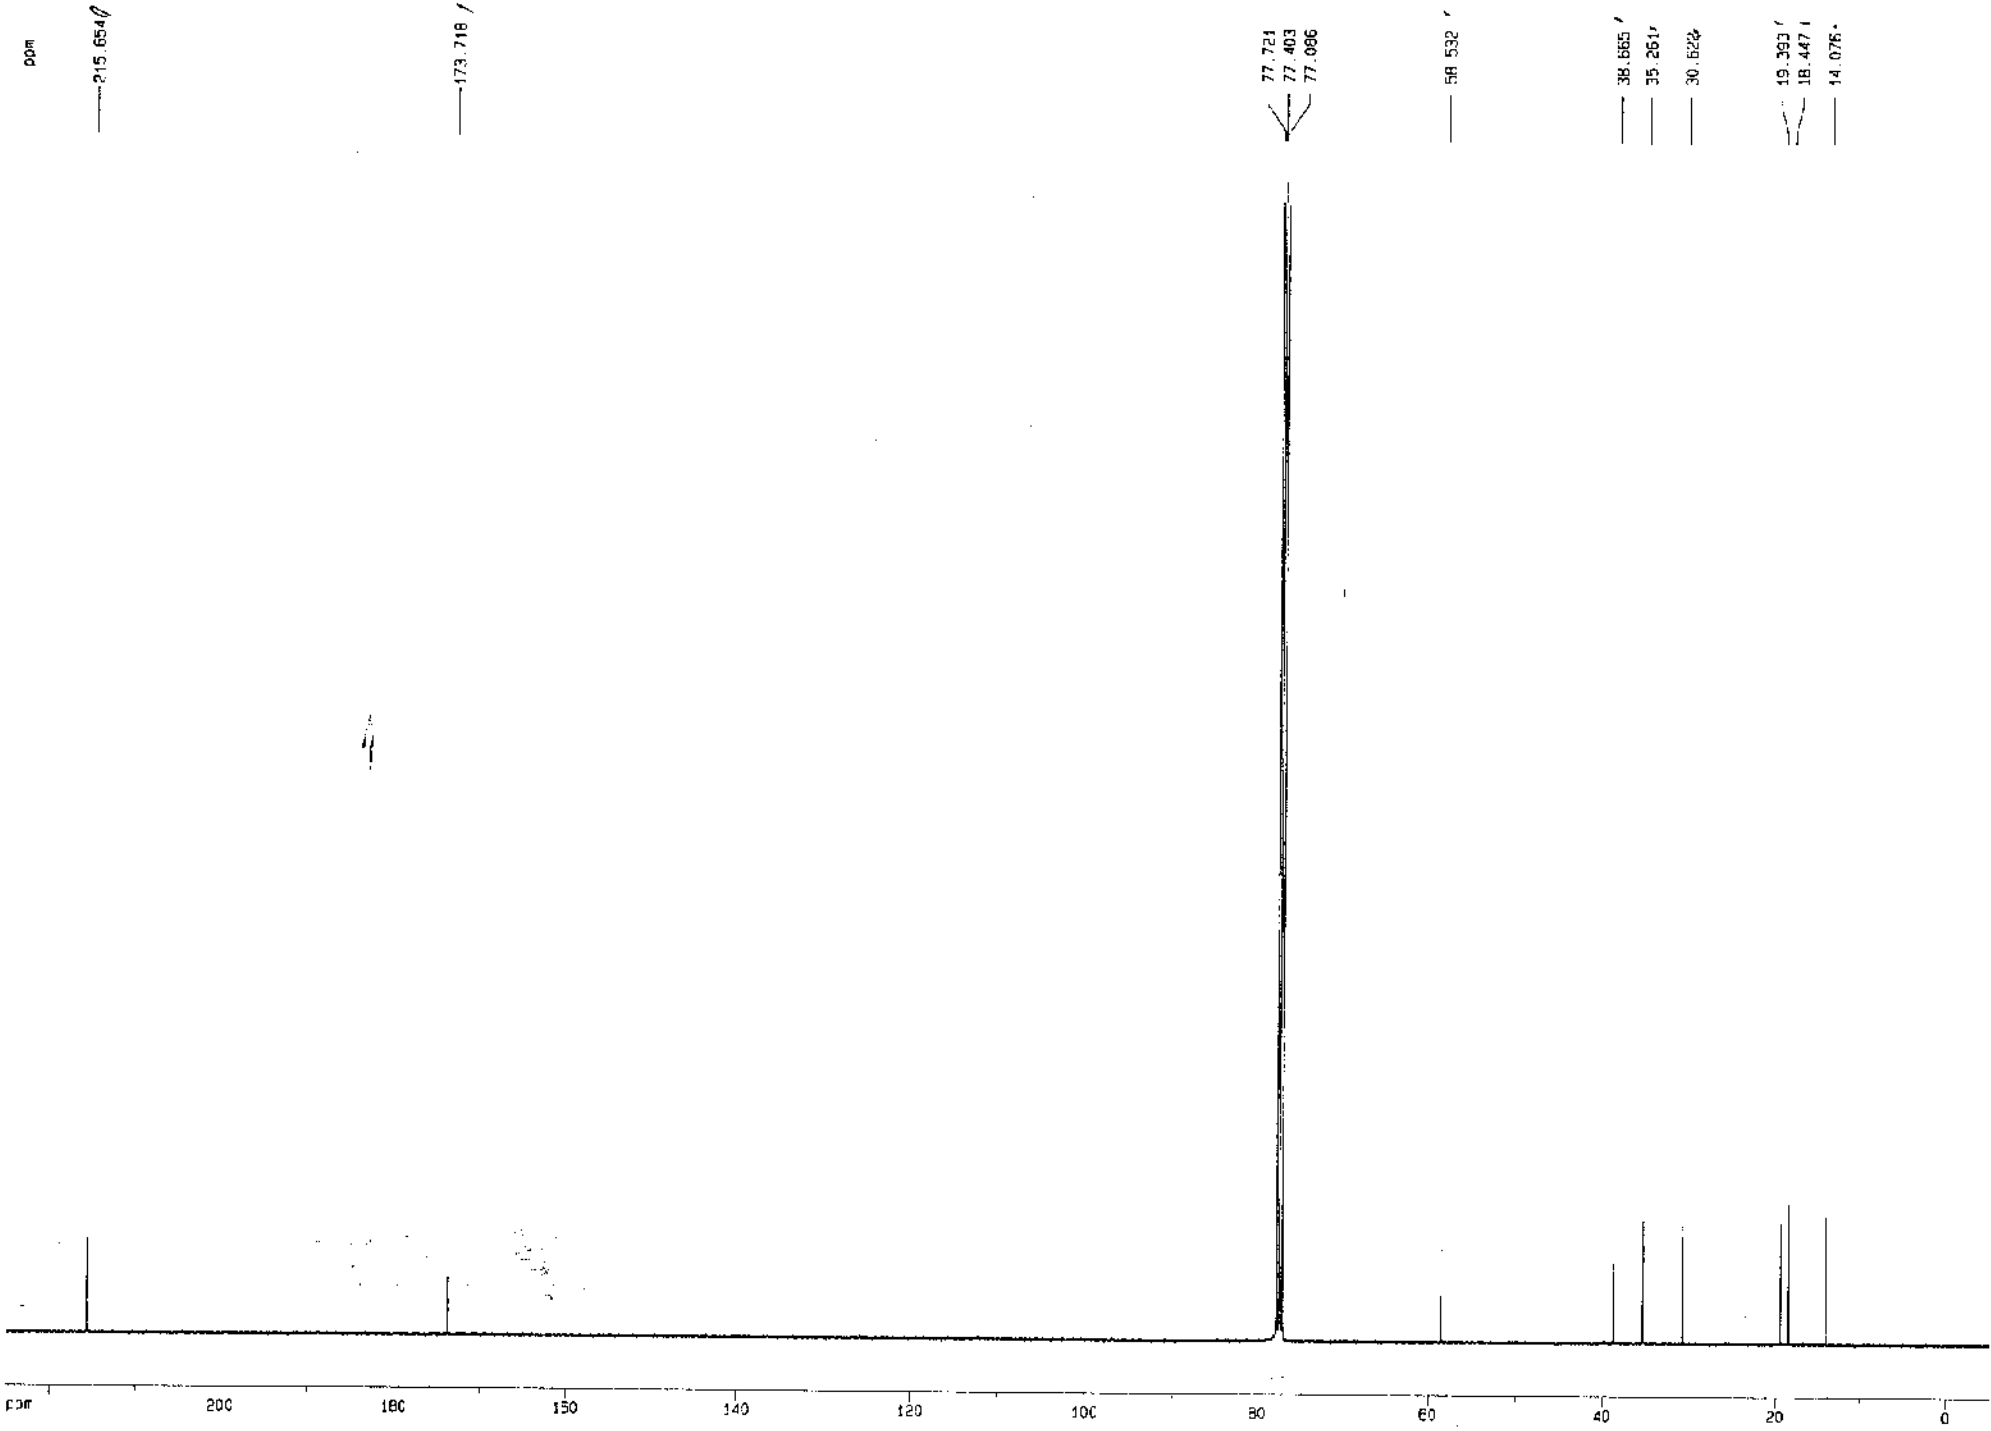

I-70/2

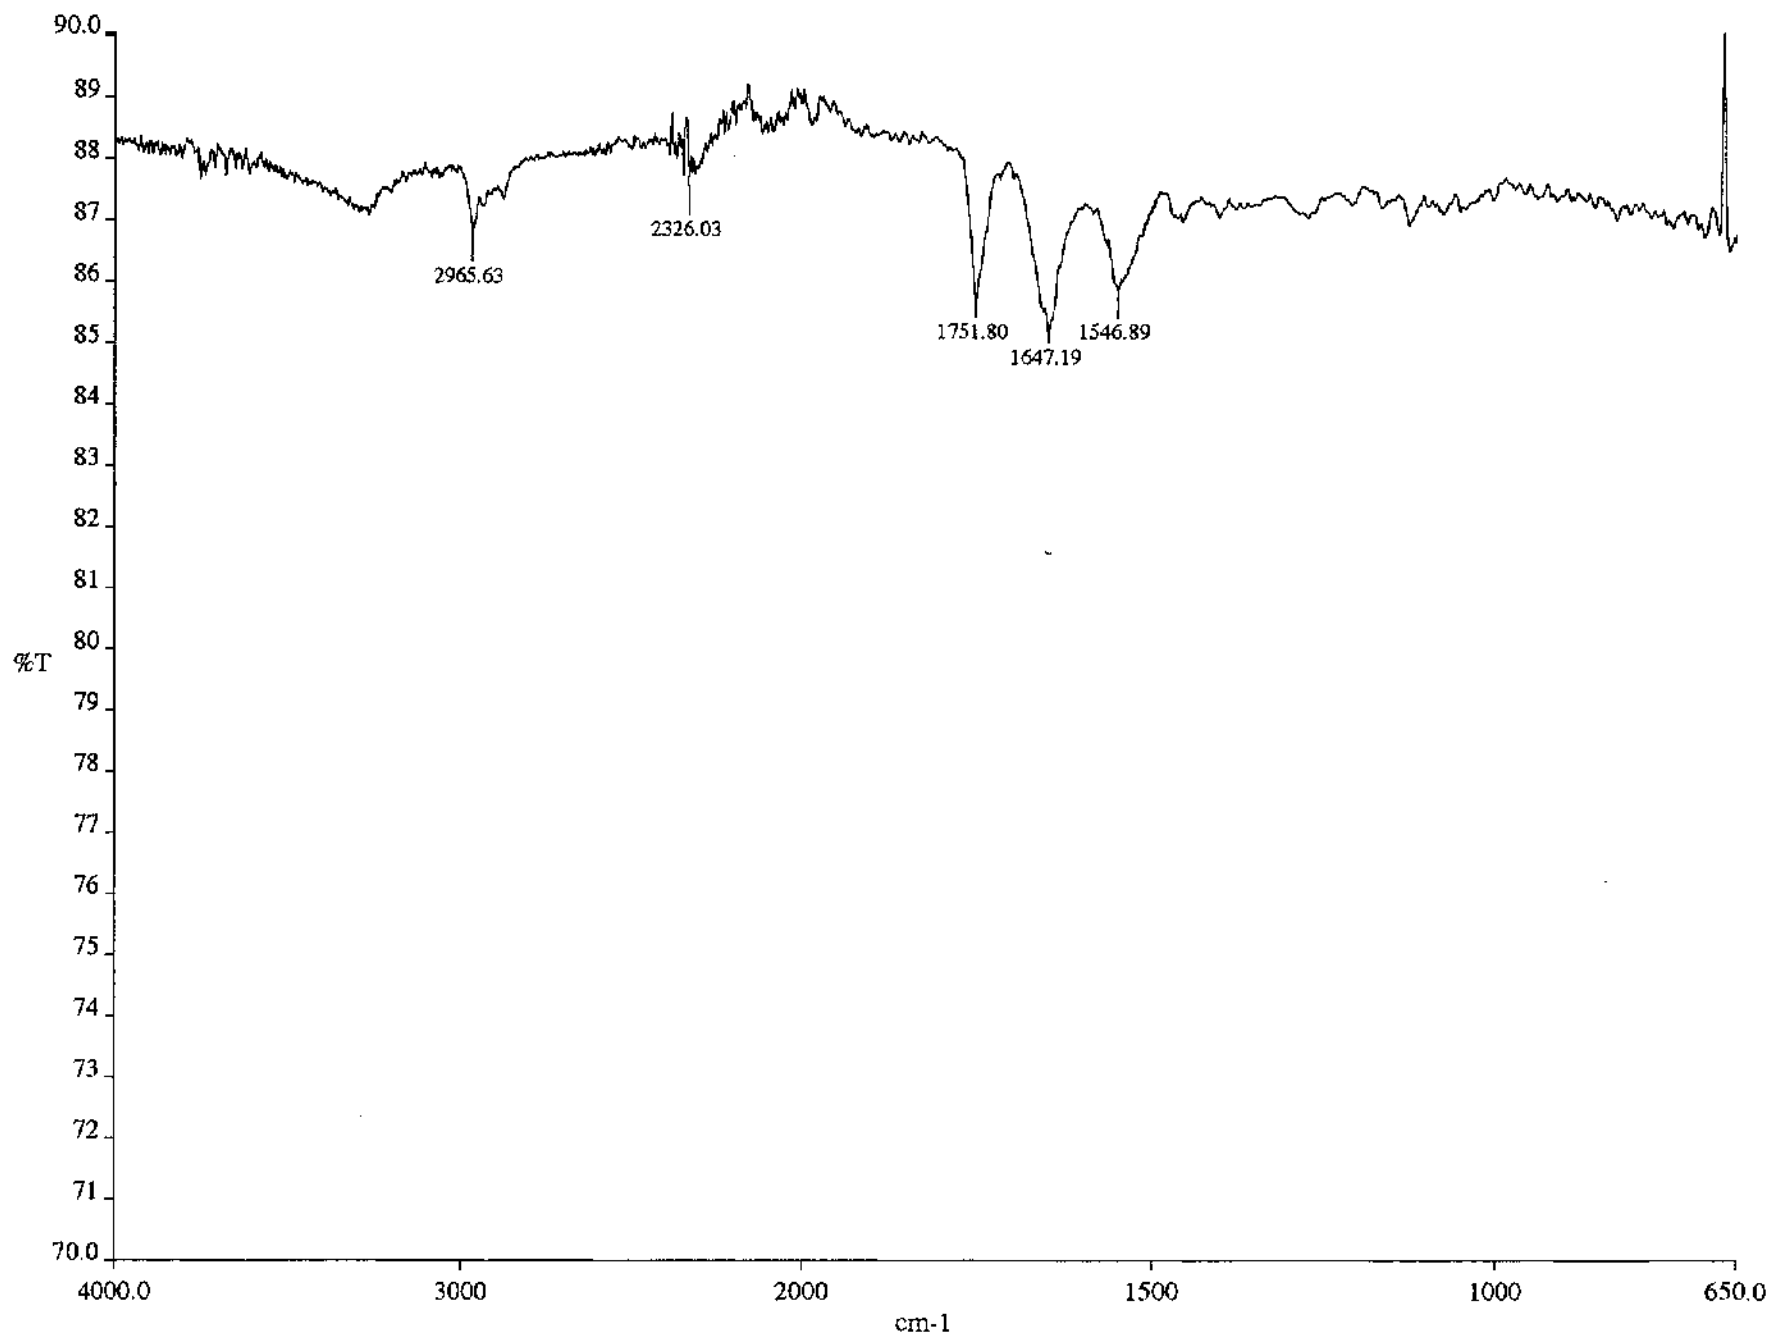

I-63/2

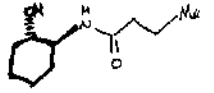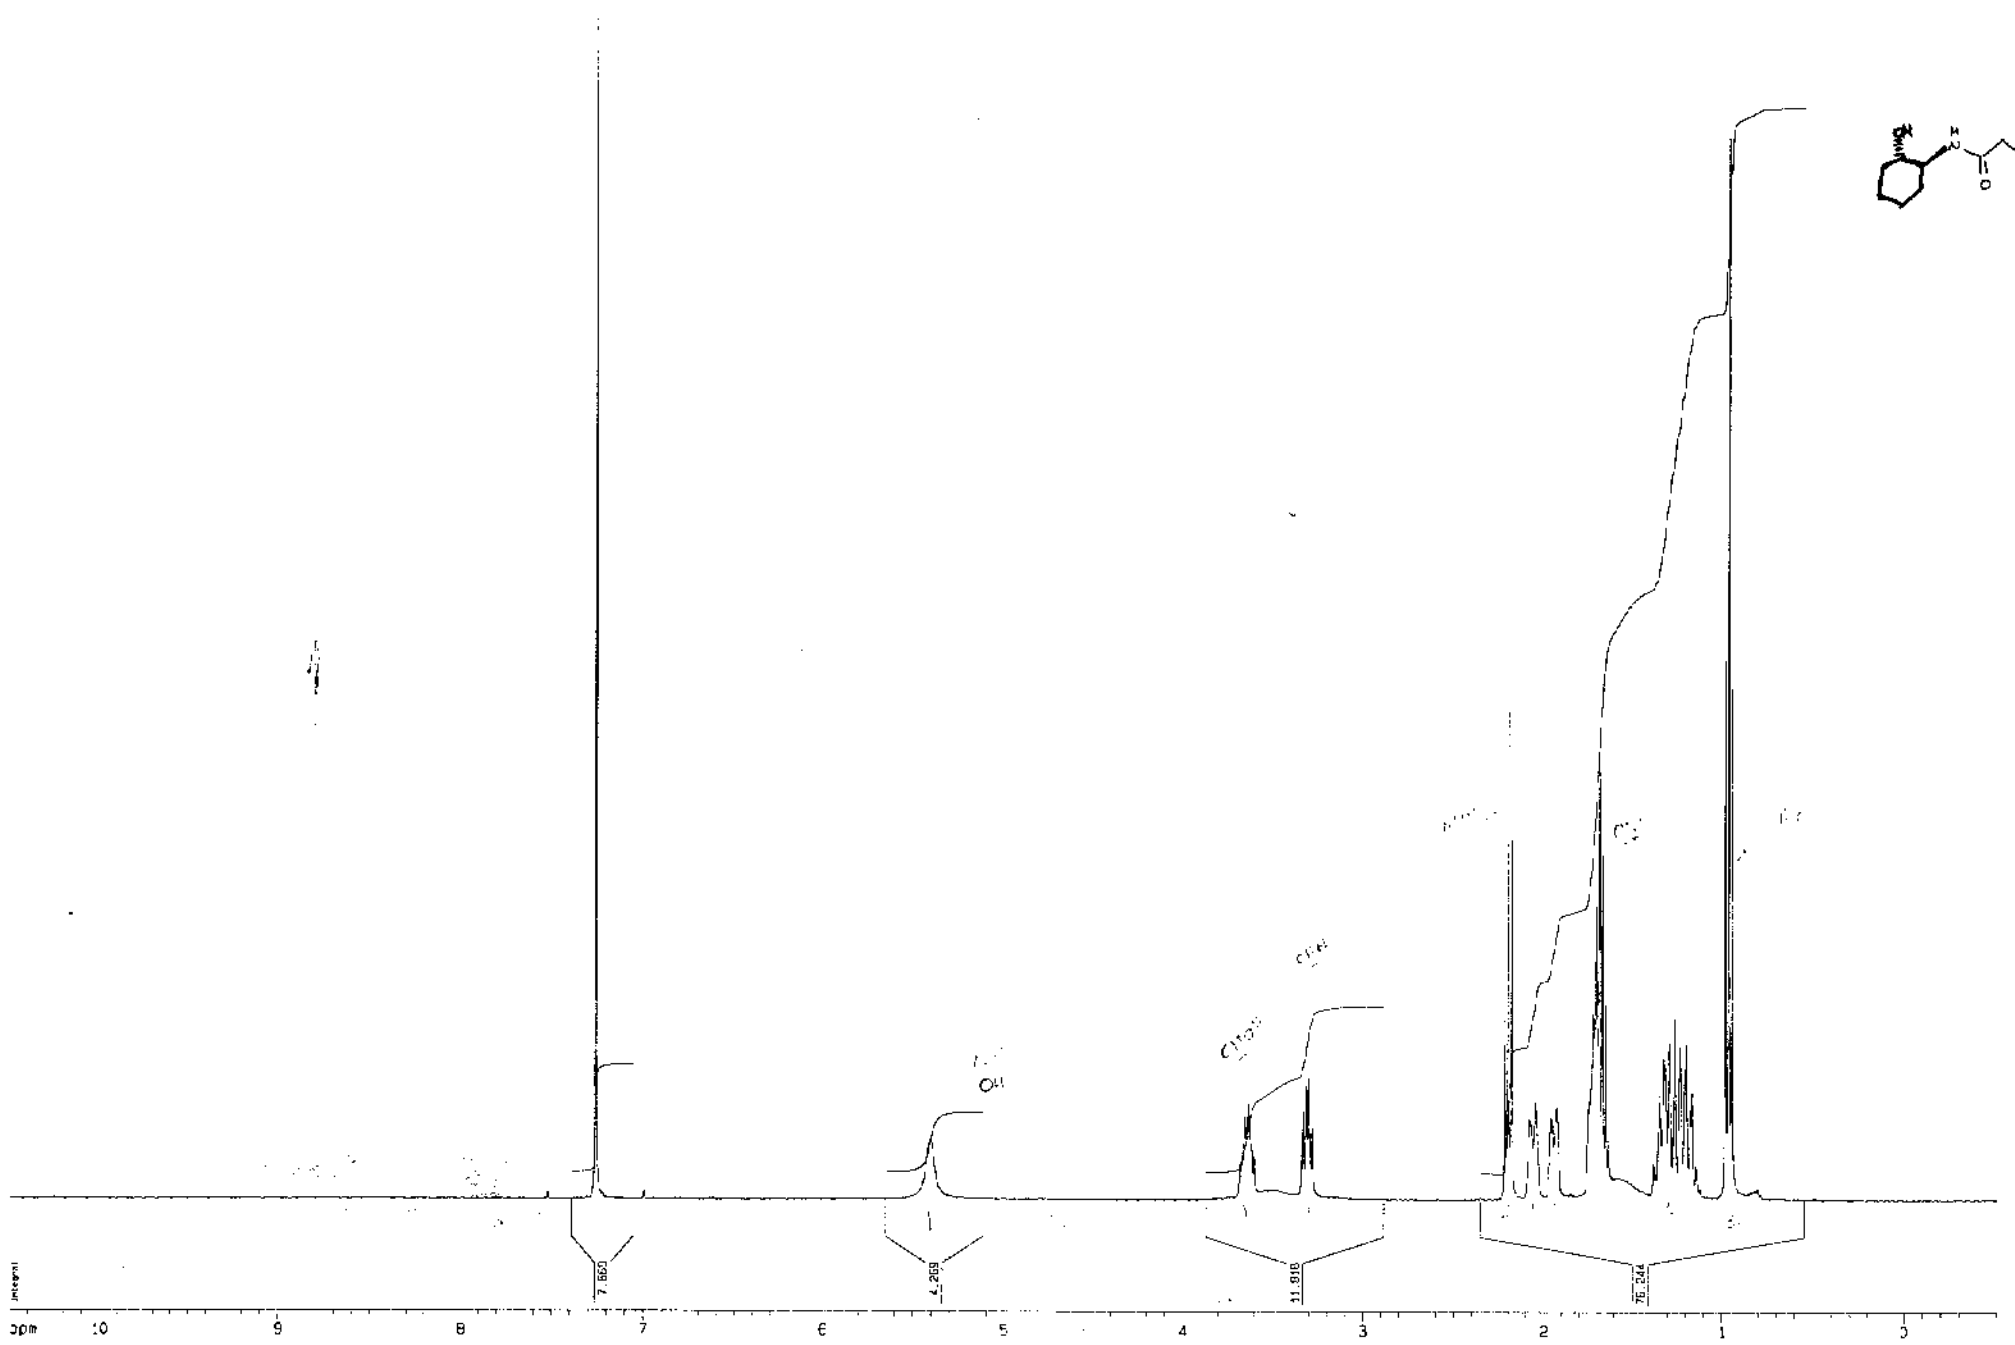

ppm

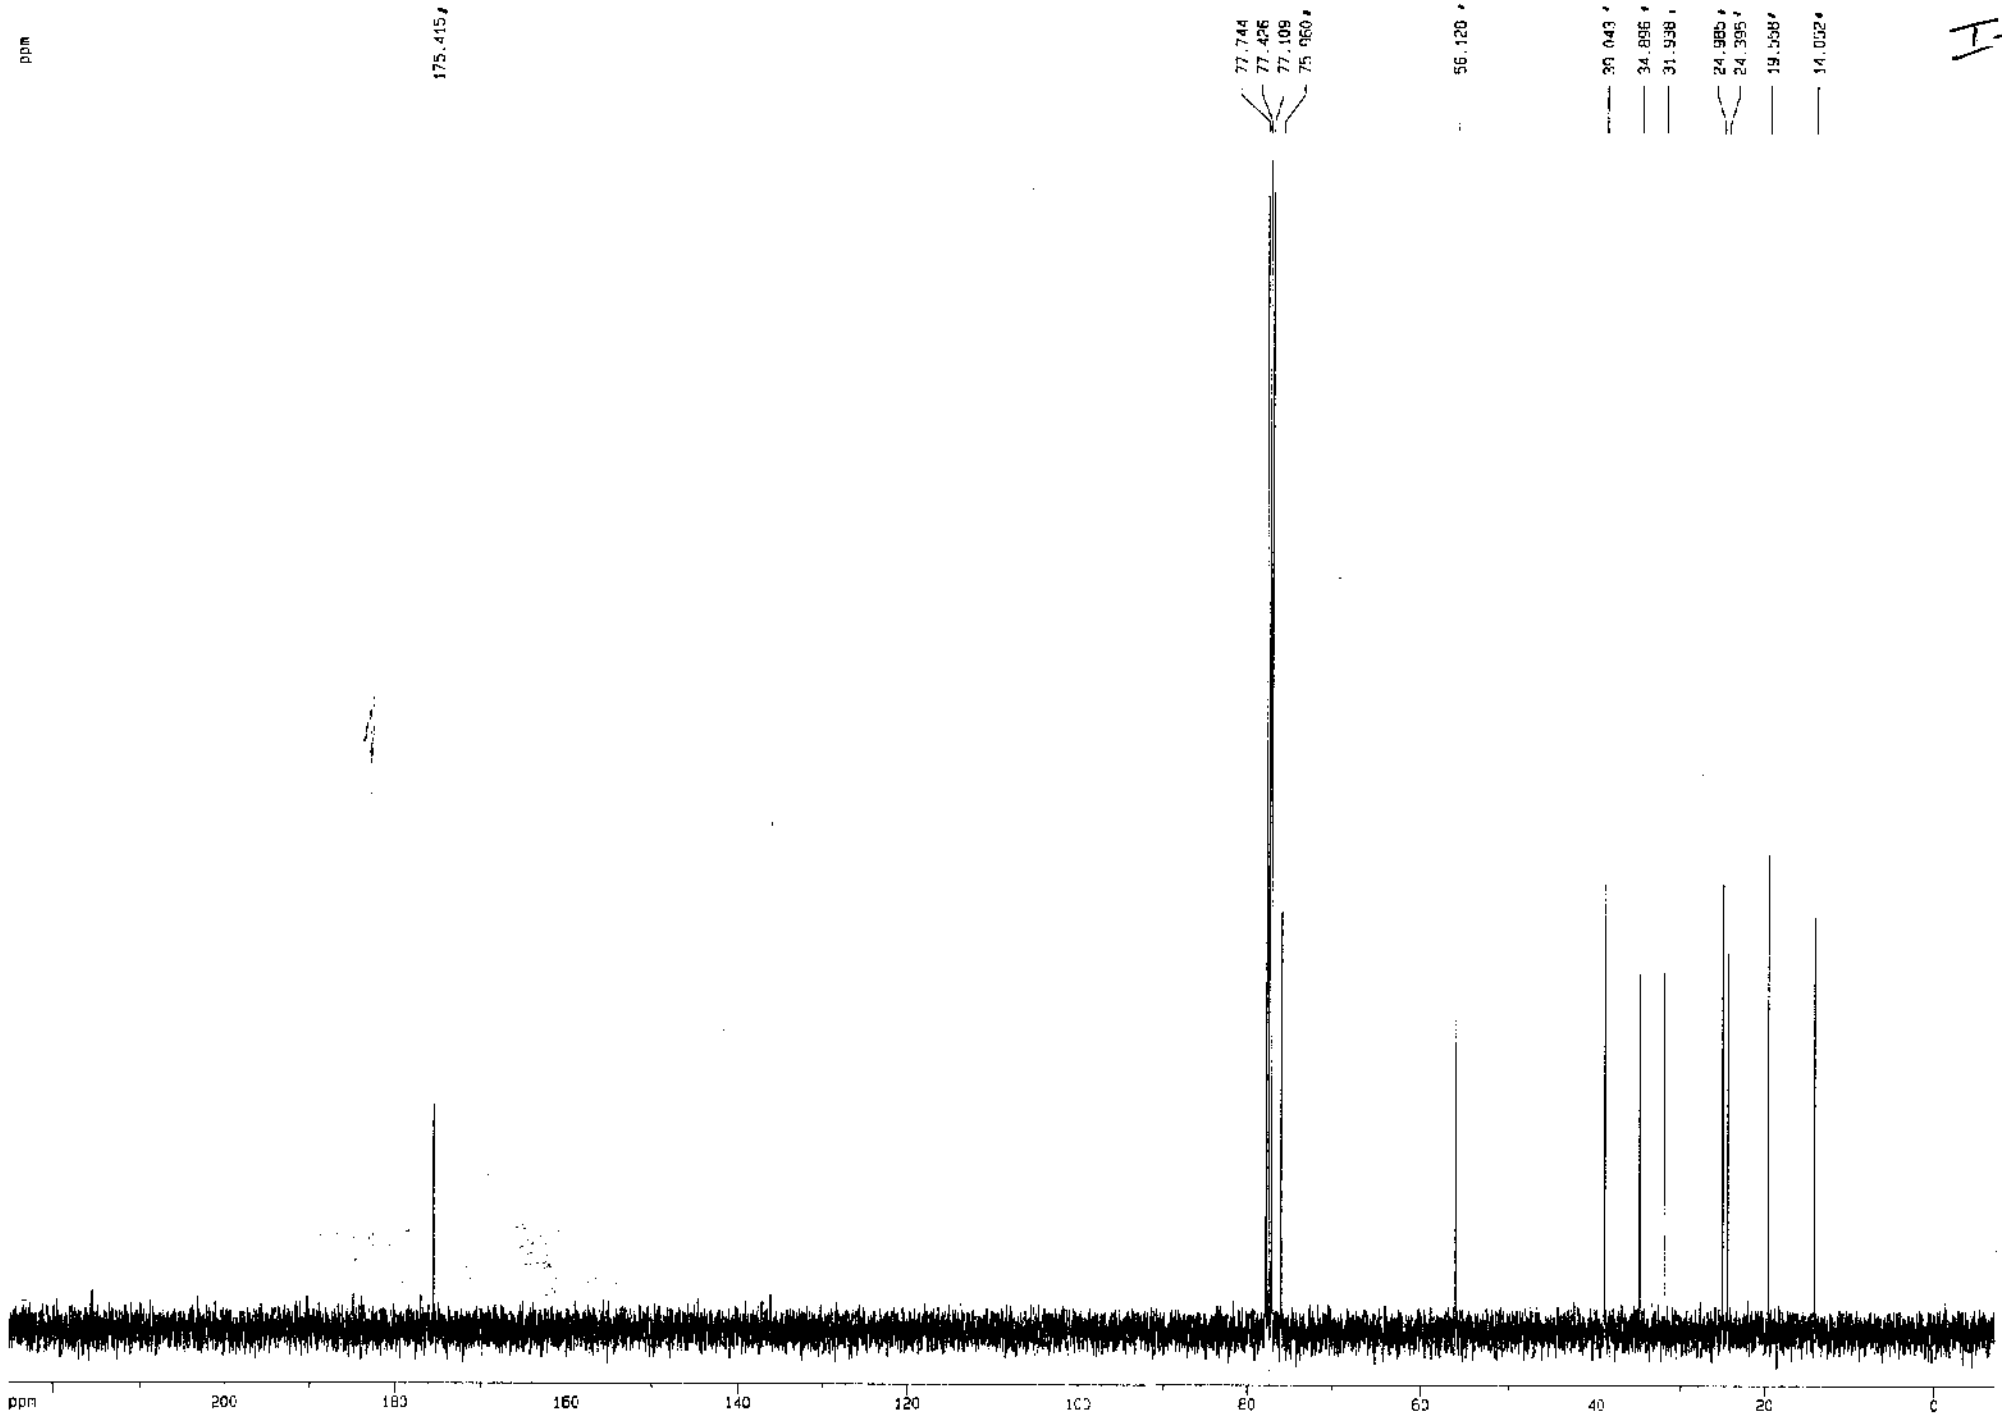

ppm 200 180 160 140 120 100 80 60 40 20 0

I-63/2

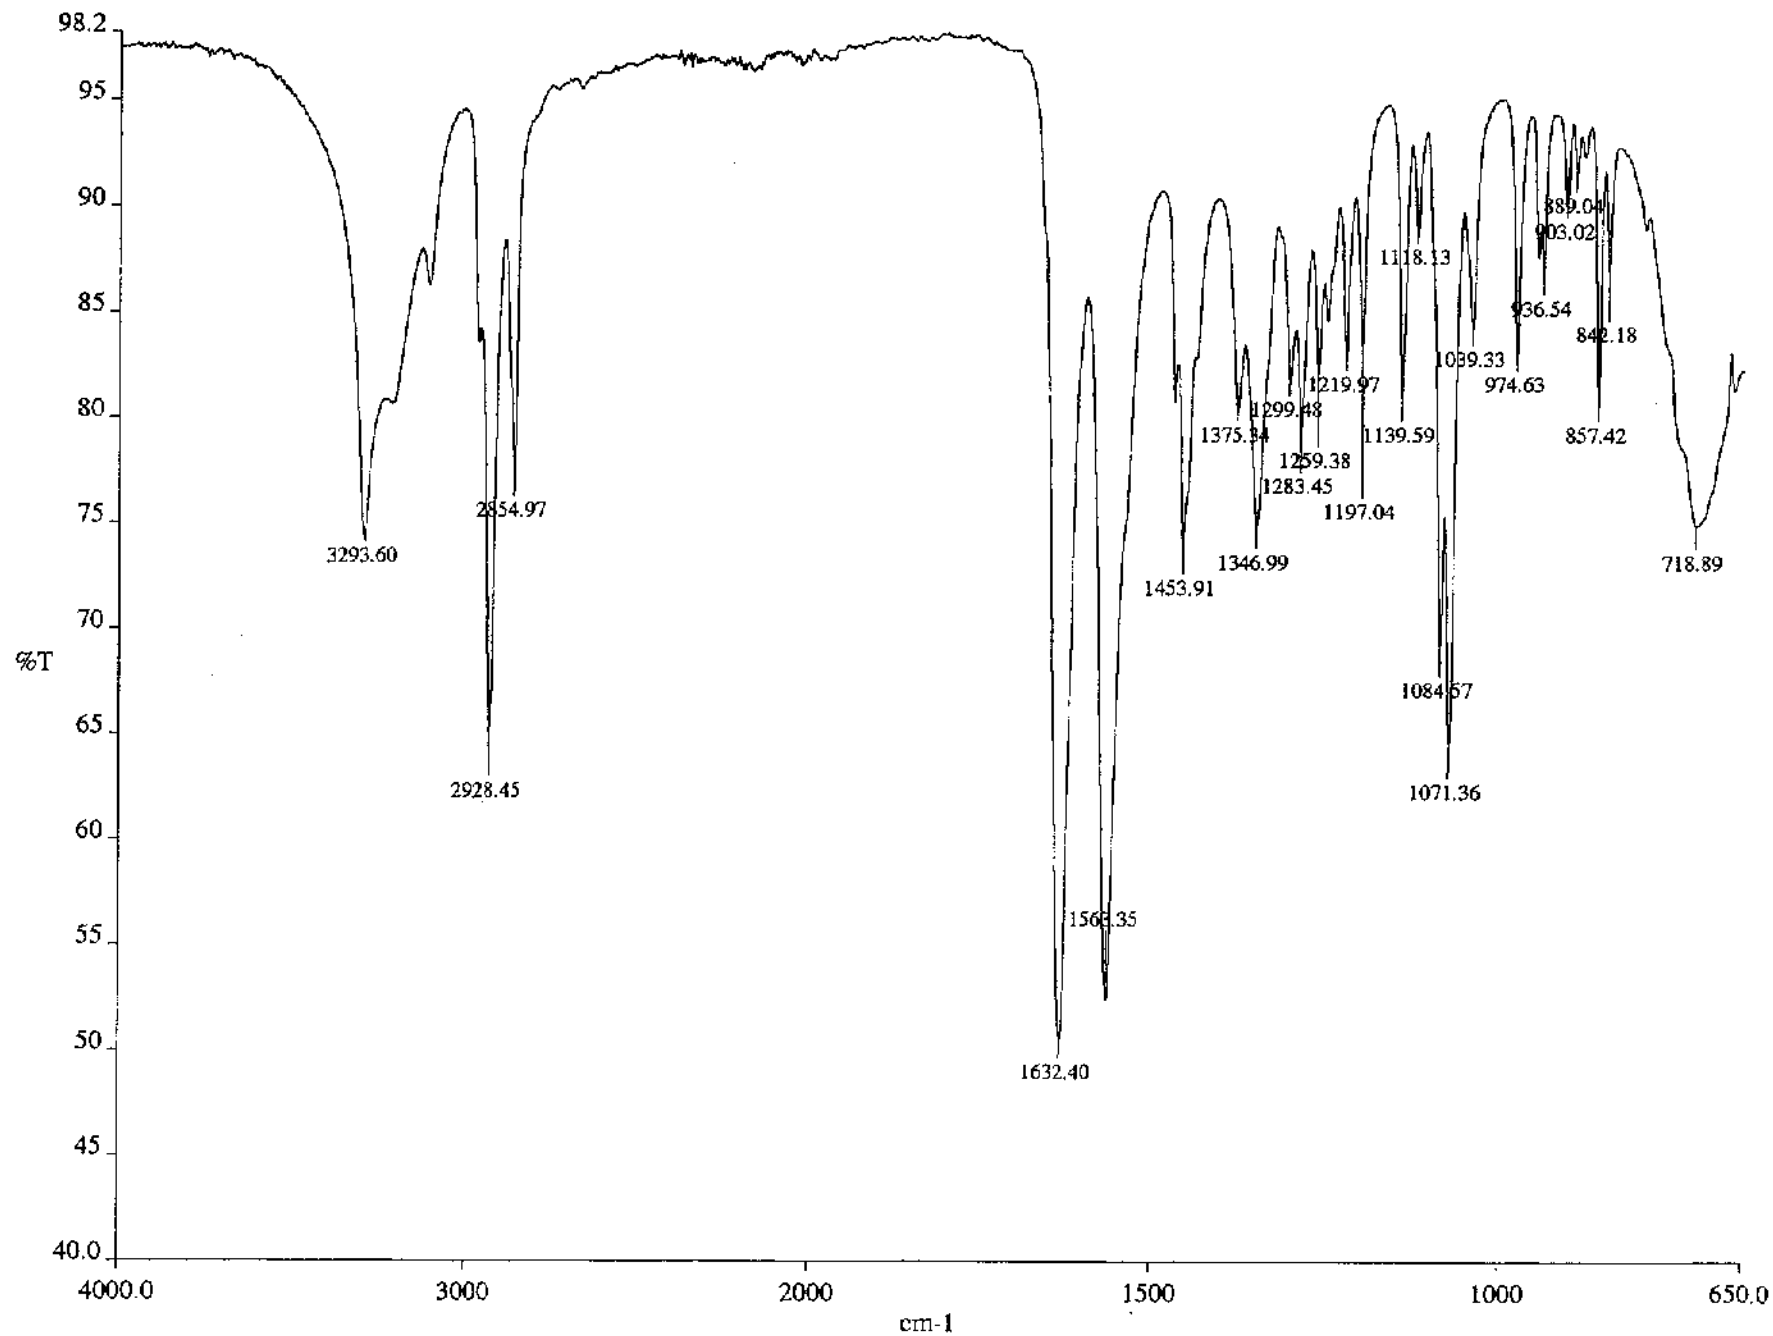

I-66/2

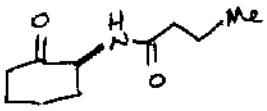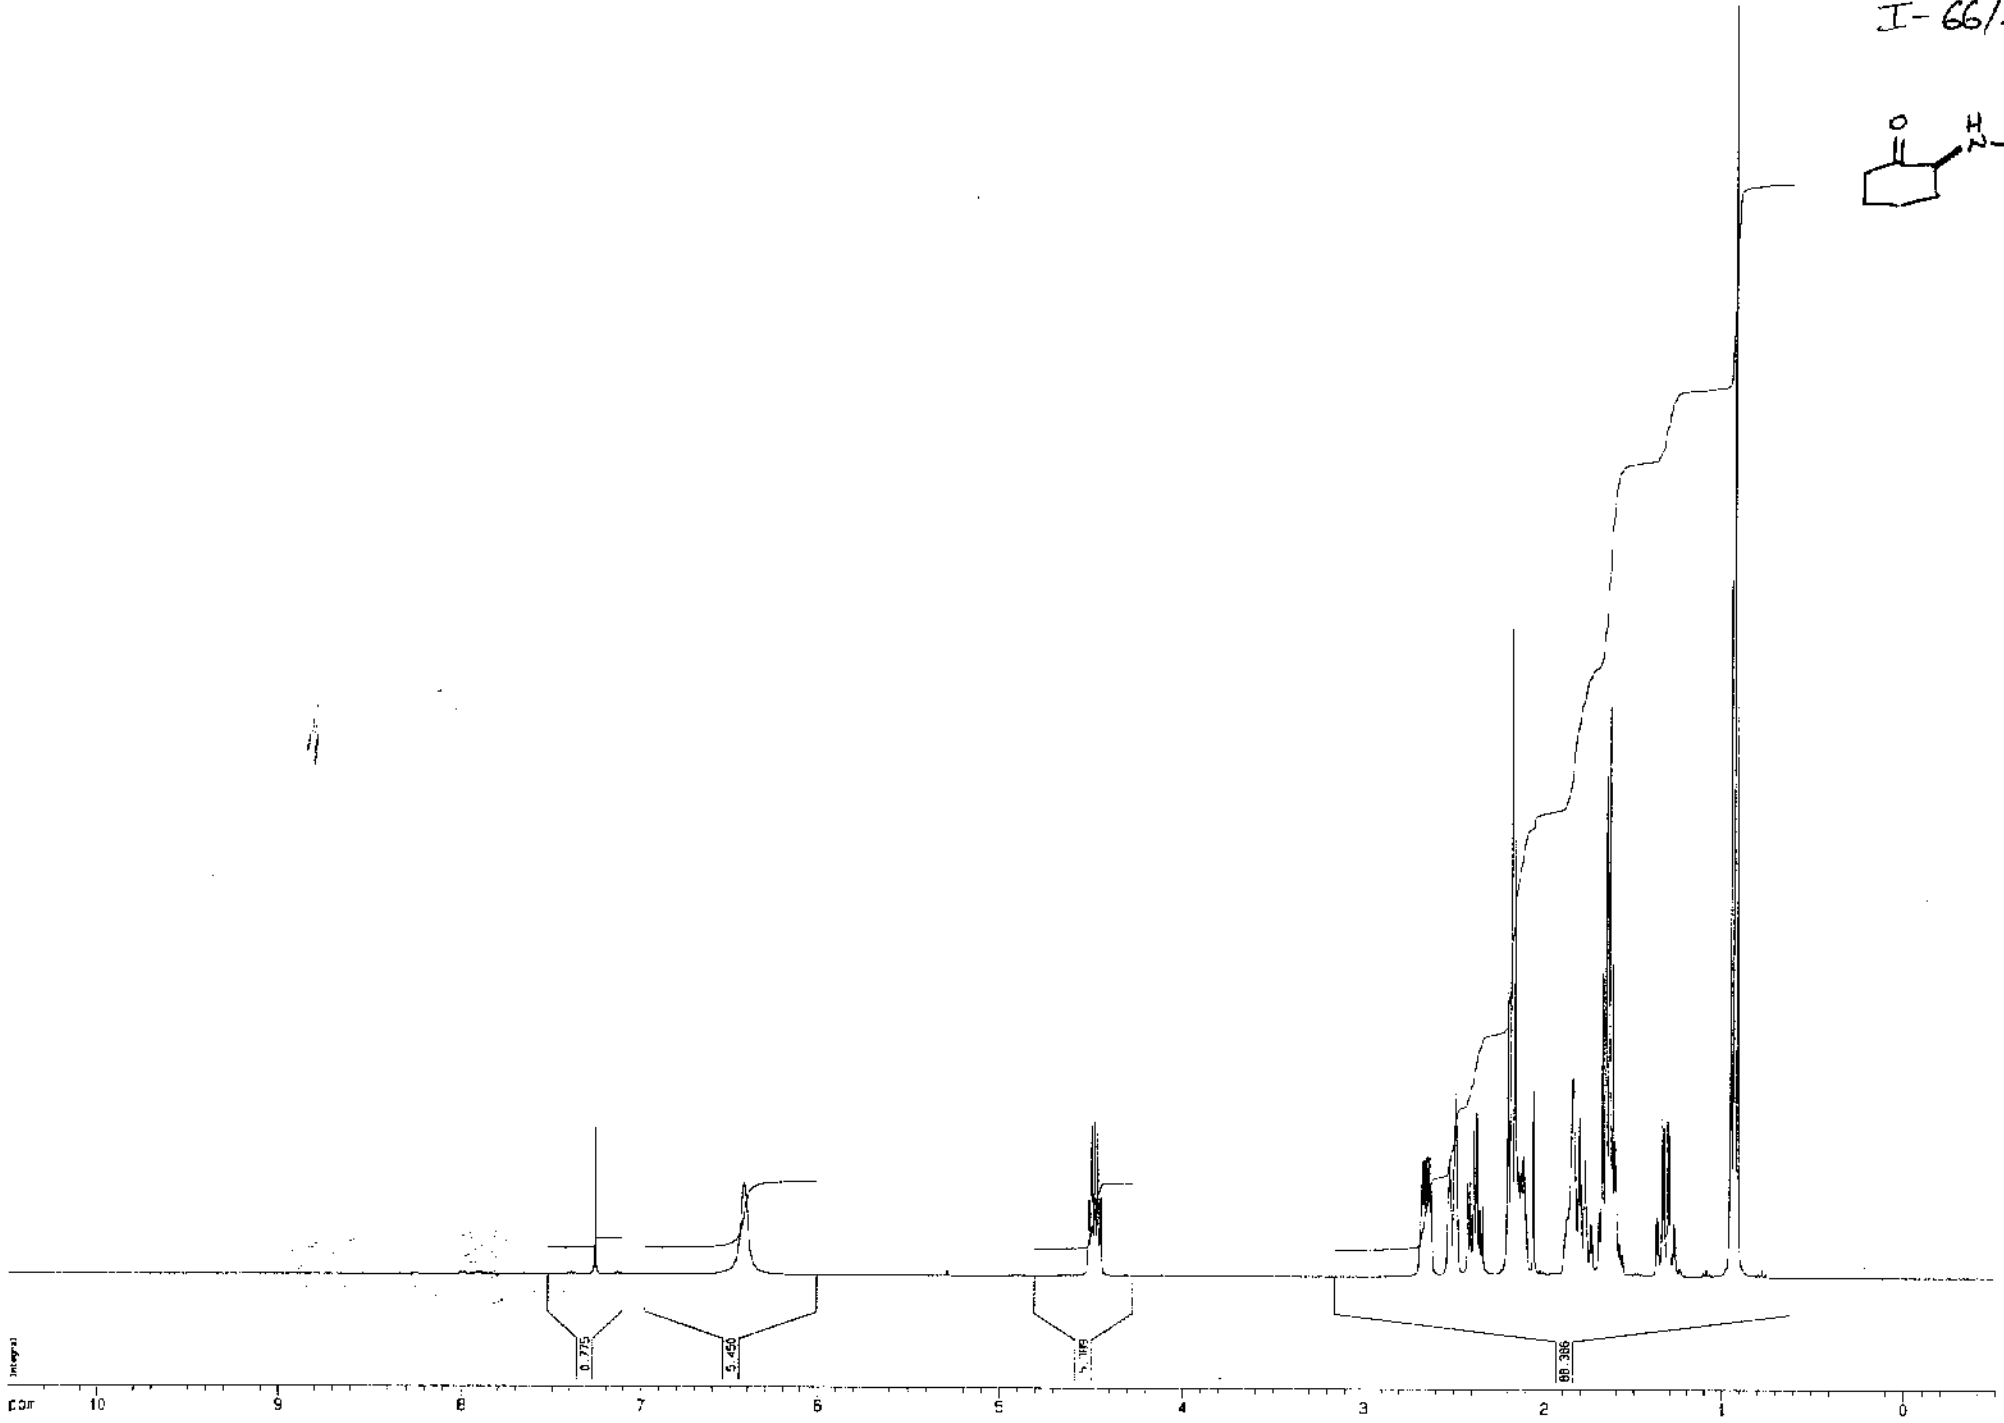

PPM

200.345

173.055

77.740  
77.422  
77.105

58.404

41.545  
38.933  
35.005

28.462  
24.424

19.473  
14.050

I-66/2

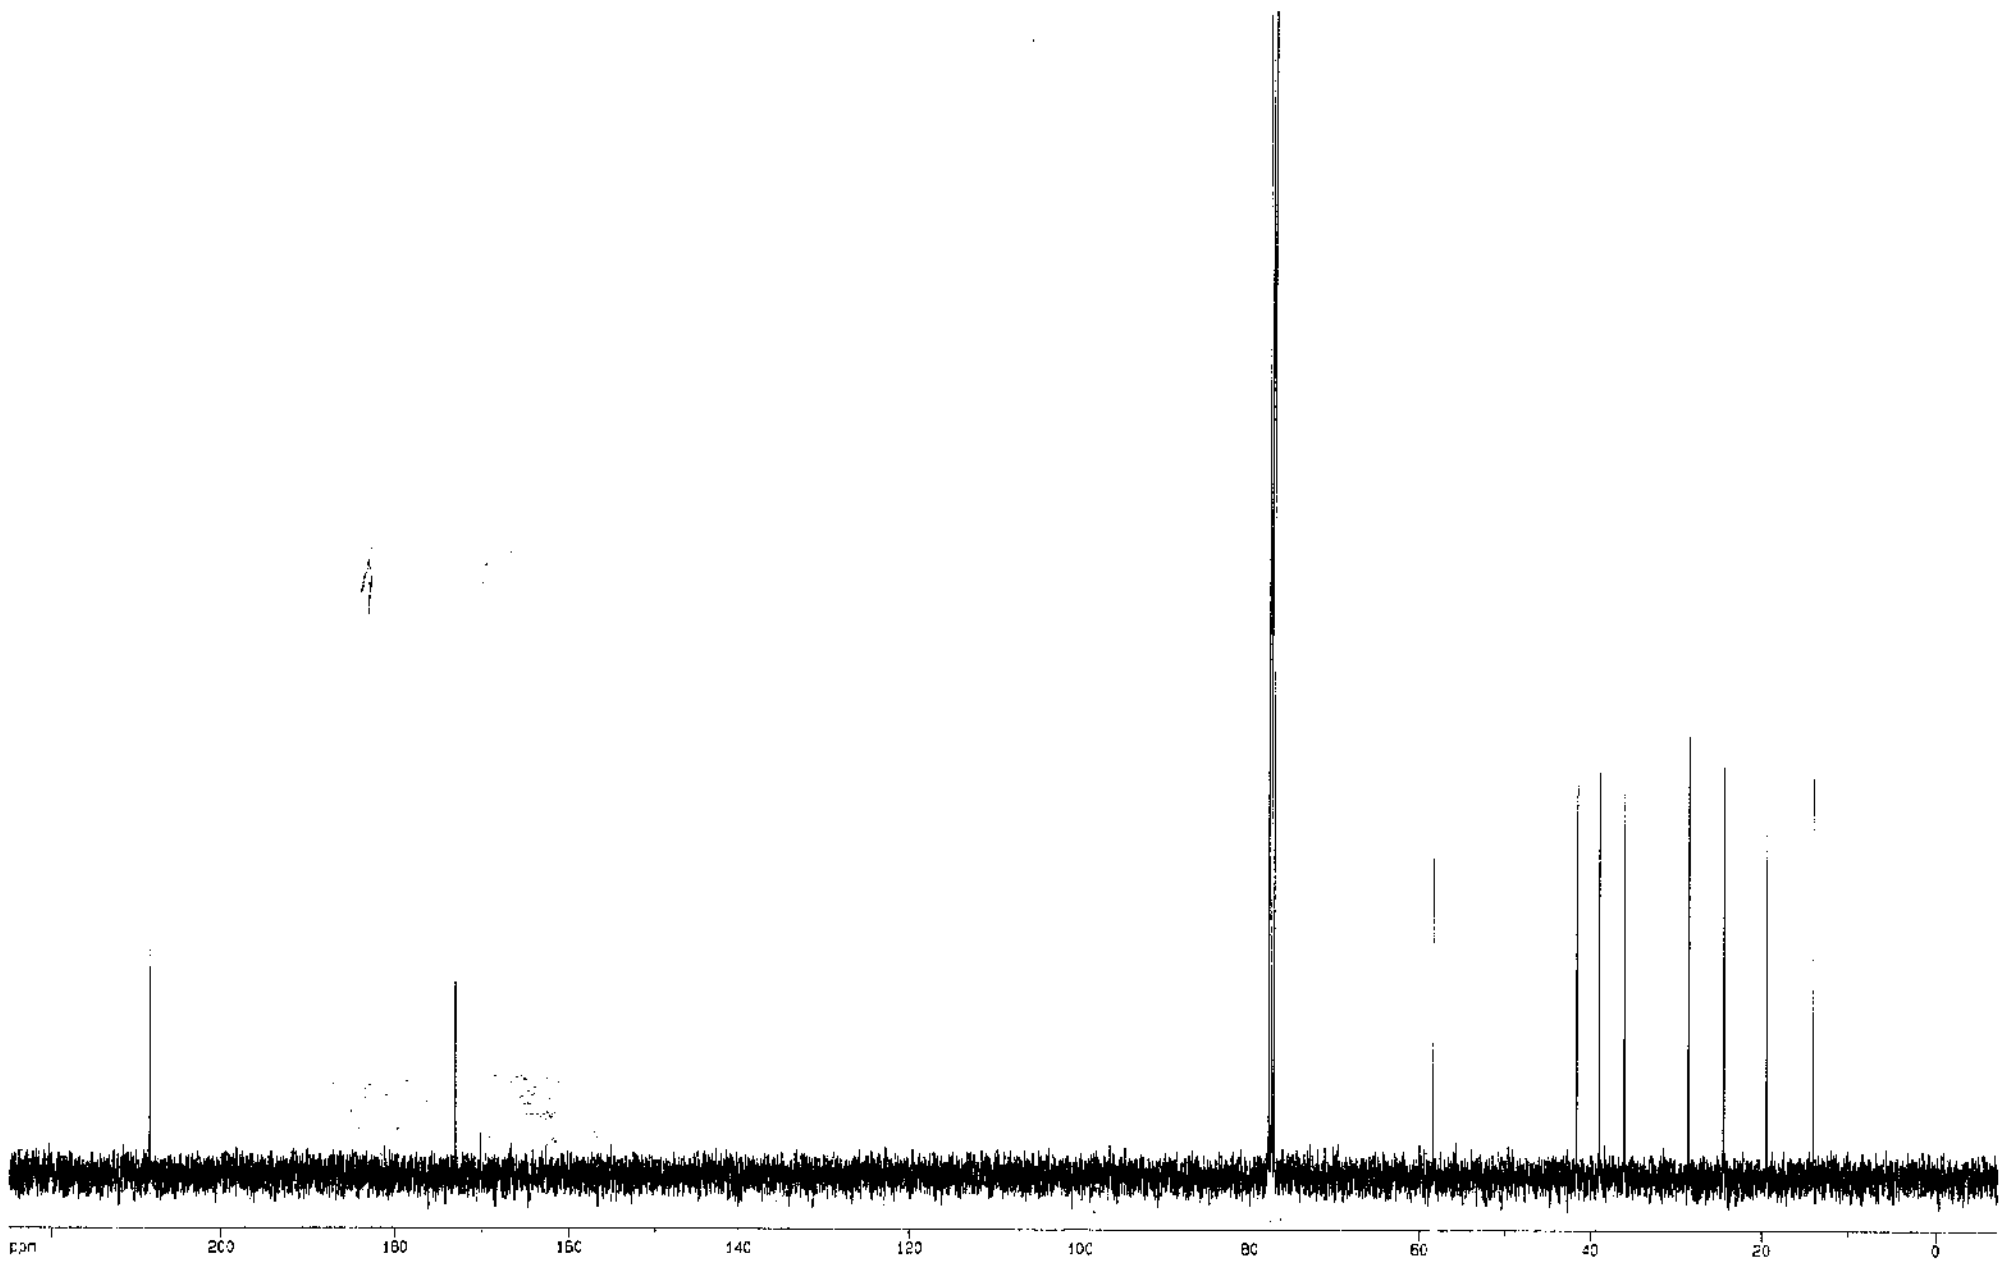

I-66/2

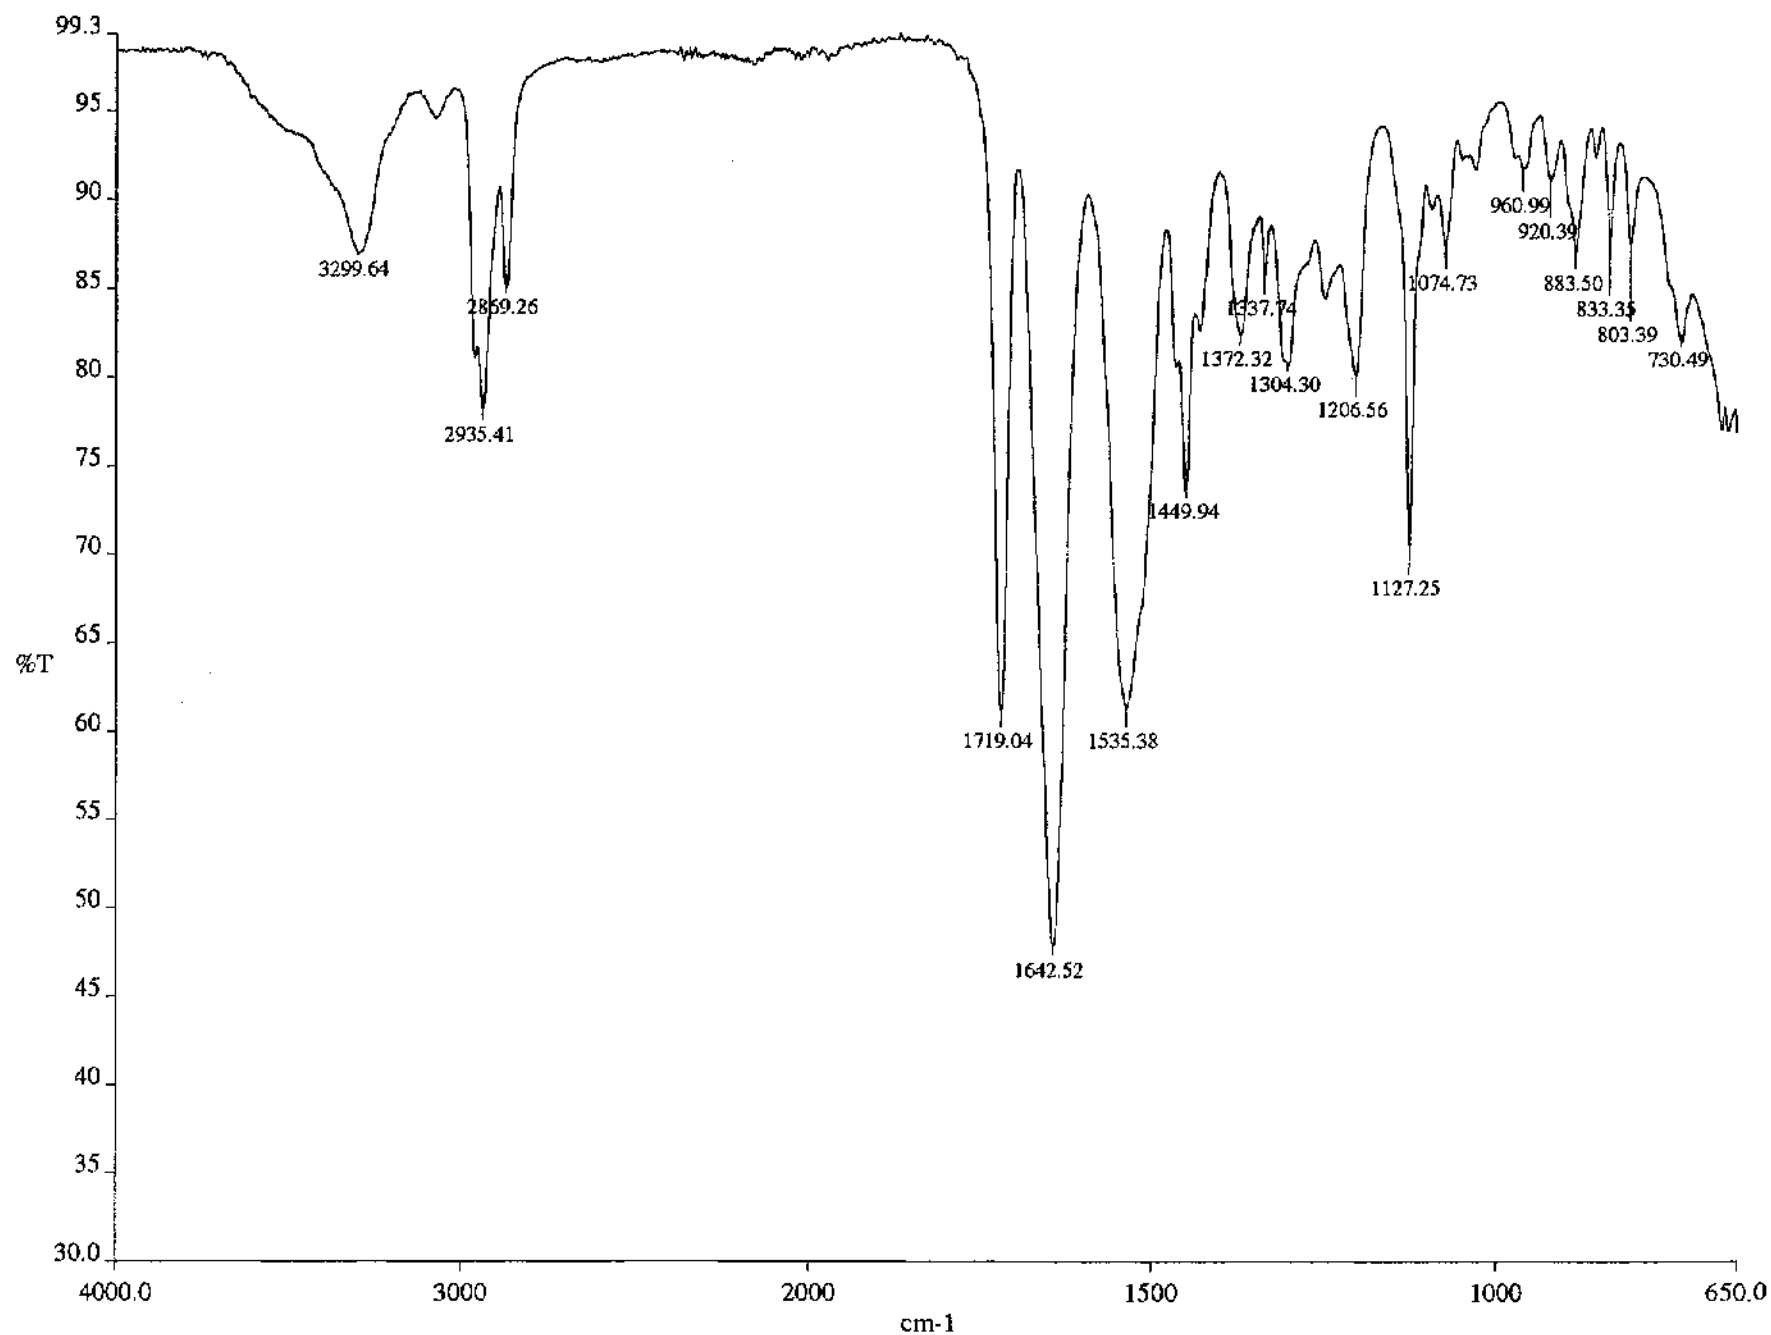

I-162/2

ppm

Starcard A™ 6B DRX500 1H

Current Data Parameters  
 NAME I:62/2  
 EXPNO 3  
 PROCNO 1

F2 - Acquisition Parameters  
 Date\_ 20040326  
 Time 11.28  
 INSTRUM AV500  
 PROBHD 5 mm BBI BB-H  
 PULPROG zg30  
 TD 65536  
 SOLVENT CDCl3  
 NS 16  
 DS 2  
 SWH 10330.578 Hz  
 FIDRES 0.157532 Hz  
 AQ 3.1720407 sec  
 RG 512  
 DA 48.400 usec  
 DE 6.00 usec  
 TE 300.0 K  
 O1 1.0000000 sec

----- CHANNEL f1 -----  
 NUC1 1H  
 P1 10.75 usec  
 PL1 -3.00 dB  
 SFO1 500.2030885 MHz

F2 - Processing parameters  
 SI 131072  
 SF 500.2000000 MHz  
 NDM 0  
 SSB 0  
 LB 0.30 Hz  
 GB 0  
 PC 1.00

1D NMR plot parameters  
 CX 27.00 cm  
 CY 13.50 cm  
 FIP 12.000 ppm  
 F1 5032.40 Hz  
 F2 0.000 ppm  
 F2 0.00 Hz  
 PPH2 0.44444 ppm/cm  
 HZCM 222.31111 Hz/cm

- 4.08545
- 4.08125
- 3.86049
- 3.83119
- 3.82402
- 3.81546
- 3.81055
- 3.80117
- 3.63817
- 3.63268
- 3.62322
- 3.61170
- 3.61147
- 3.60271
- 2.25535
- 2.21101
- 2.19574
- 2.05658
- 1.93729
- 1.79043
- 1.77163
- 1.75598
- 1.78124
- 1.77085
- 1.76650
- 1.76208
- 1.74450
- 1.74735
- 1.72000
- 1.71826
- 1.70400
- 1.69994
- 1.67547
- 1.67364
- 1.61932
- 1.60338
- 1.59509
- 1.58586
- 1.58233
- 1.27599
- 1.12225
- 0.98756
- 0.90086
- 0.88281
- 0.86802
- 0.91411
- 0.90034

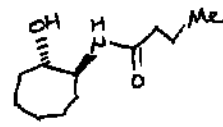

Integra

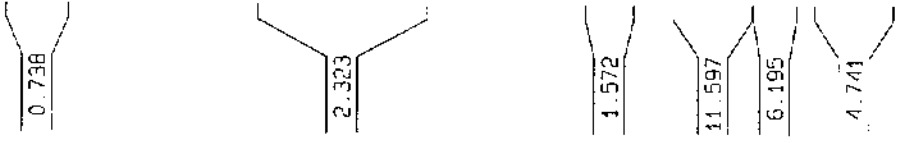

ppm 11 10 9 8 7 6 5 4 3 2 1

13C

174.1624

76.973  
77.261  
77.007  
76.753

69.250

38.642  
34.048  
31.456  
29.697  
28.568  
21.906  
22.905  
19.164  
13.679

Current Data Parameters  
NAME 1162/2  
EXPNO 1  
PROCNO 1

F2 - Acquisition Parameters  
Date\_ 20040326  
Time 10.37  
INSTRUM AN500  
PROBHD 5 mm BBO BB-1H  
PU\_PROG zgpg30  
TD 65536  
SOLVENT CCL3  
NS 671  
DS 4  
SFO 35211.270 MHz  
FIDRES 0.537281 Hz  
AQ 0.9306754 sec  
RG 16384  
DN 14.200 usec  
DE 6.00 usec  
TE 300.2 K  
D1 4.0000000 sec  
d12 0.0300000 sec  
d12 0.0000000 sec

----- CHANNEL f1 -----  
NUC1 13C  
P1 8.45 usec  
PL1 4.00 dB  
SFO1 125.7692253 MHz

----- CHANNEL f2 -----  
SFO2 500.1324996 MHz  
NUC2 1H  
P2 65.00 usec  
PL2 4.00 dB  
PL12 13.00 dB  
PL13 13.00 dB  
SFO2 500.1324996 MHz

F2 - Processing parameters  
SI 65536  
SF 125.7692253 MHz  
WDW EM  
SSB 0  
LB 2.00 Hz  
GB 0  
PC 1.40

1D NMR plot parameters  
CX 27.00 cm  
CY 300.00 cm  
F1P 250.000 ppm  
F1 31443.55 Hz  
F2P -25.000 ppm  
F2 -3144.39 Hz  
PPHM 10.18518 ppm/cm  
H2CM 1281.04565 Hz/cm

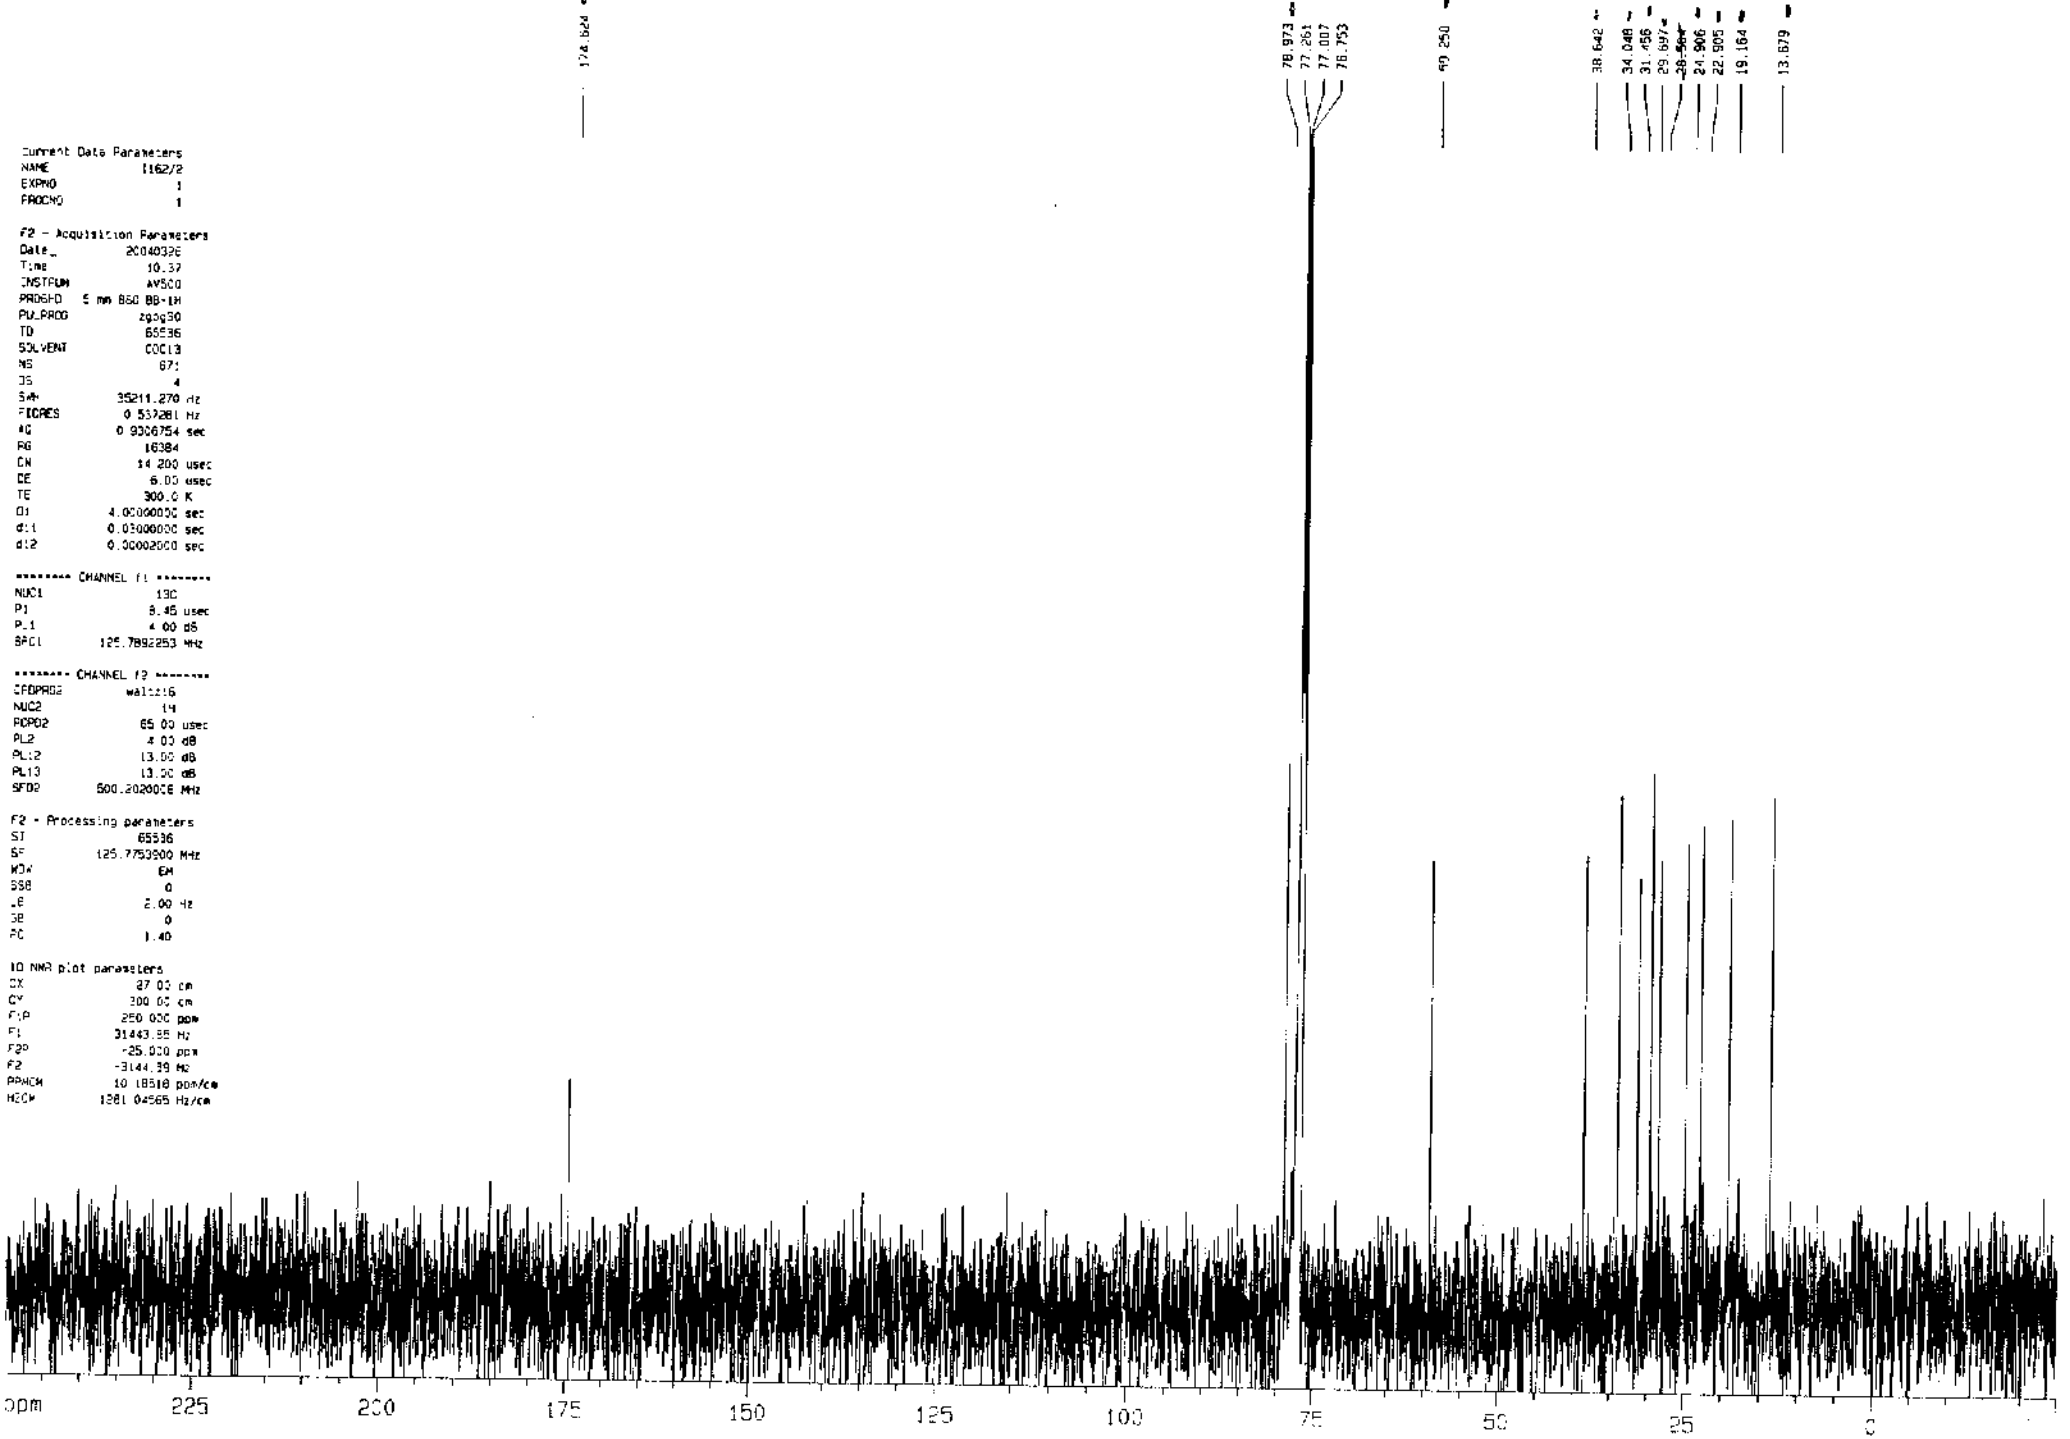

I-162/2

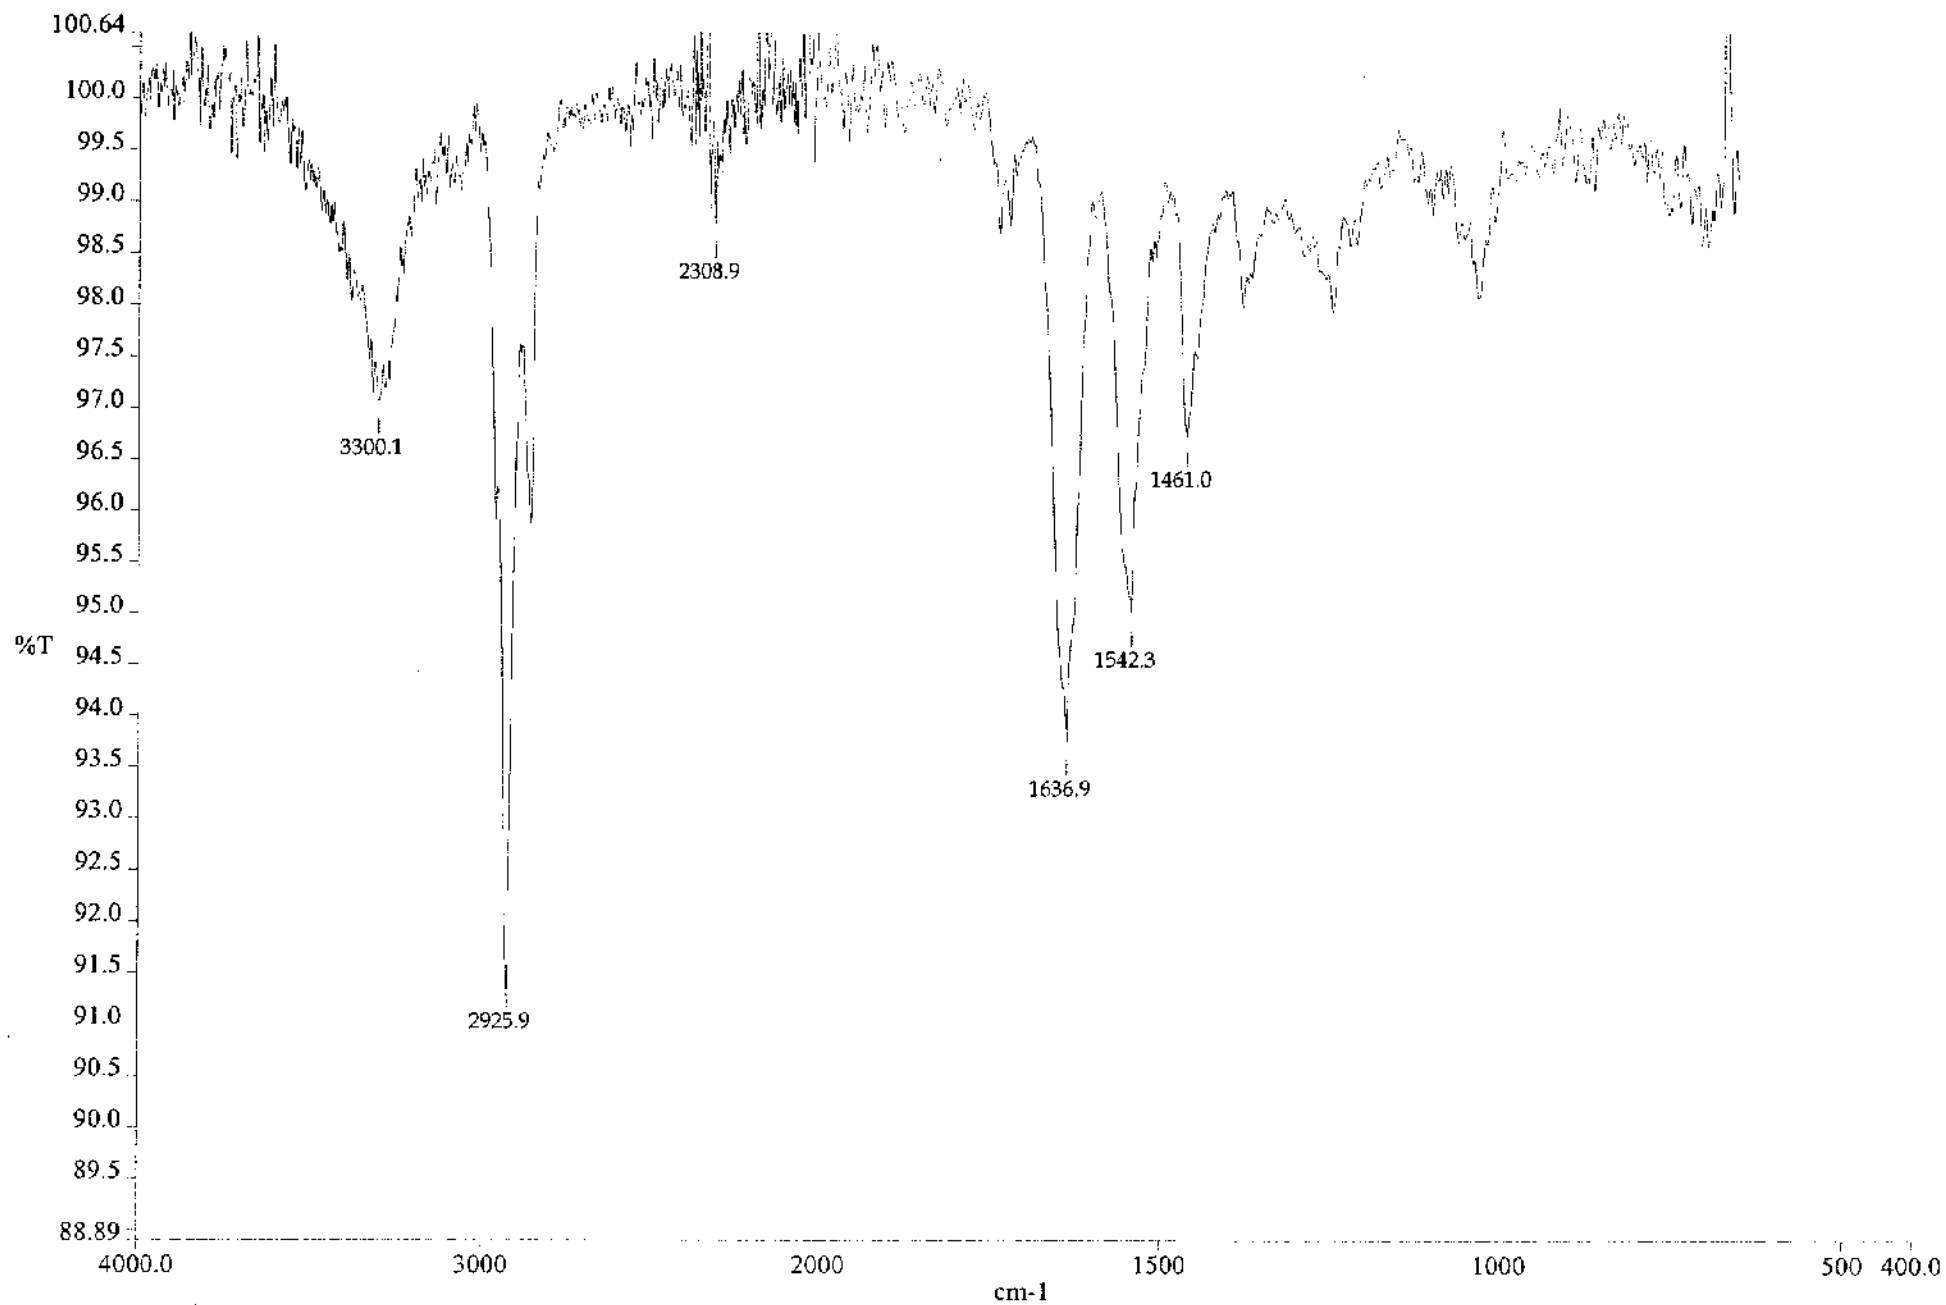

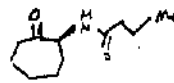

I-165/1

V62897  
 DS/I-165-1  
 David Spring  
 1H  
 CDCl3  
 Position: 14

Current Data Parameters  
 NAME V62897  
 EXPNO 10  
 PROCNO 1

F2 - Acquisition Parameters  
 Date\_ 20040402  
 Time 17.35  
 INSTRUM cp400  
 PROBHD 5 mm QNP 1H  
 PULPROG zg30  
 TO 32768  
 SOLVENT CDCl3  
 NS 16  
 DS 2  
 SWH 8223.585 Hz  
 FIDRES 0.250967 Hz  
 AQ 1.9923444 sec  
 RG 512.3  
 DW 60.800 usec  
 DE 6.00 usec  
 TE 300.0 K  
 D1 1.0000000 sec

\*\*\*\*\* CHANNEL f1 \*\*\*\*\*  
 NUC1 1H  
 P1 9.40 usec  
 PL1 0.00 dB  
 SFO1 400.1324710 MHz

F2 - Processing parameters  
 SI 32768  
 SF 400.1300135 MHz  
 NDNW EM  
 SSB 0  
 LB 0.30 Hz  
 GB 0  
 FC 1.00

1D NMR plot parameters  
 CX 35.00 cm  
 FIP 10.000 ppm  
 F1 4001.30 Hz  
 F2P -0.500 ppm  
 F2 -200.67 Hz  
 PPMCV 0.30000 ppm/c  
 F2CV 120.03600 Hz/c

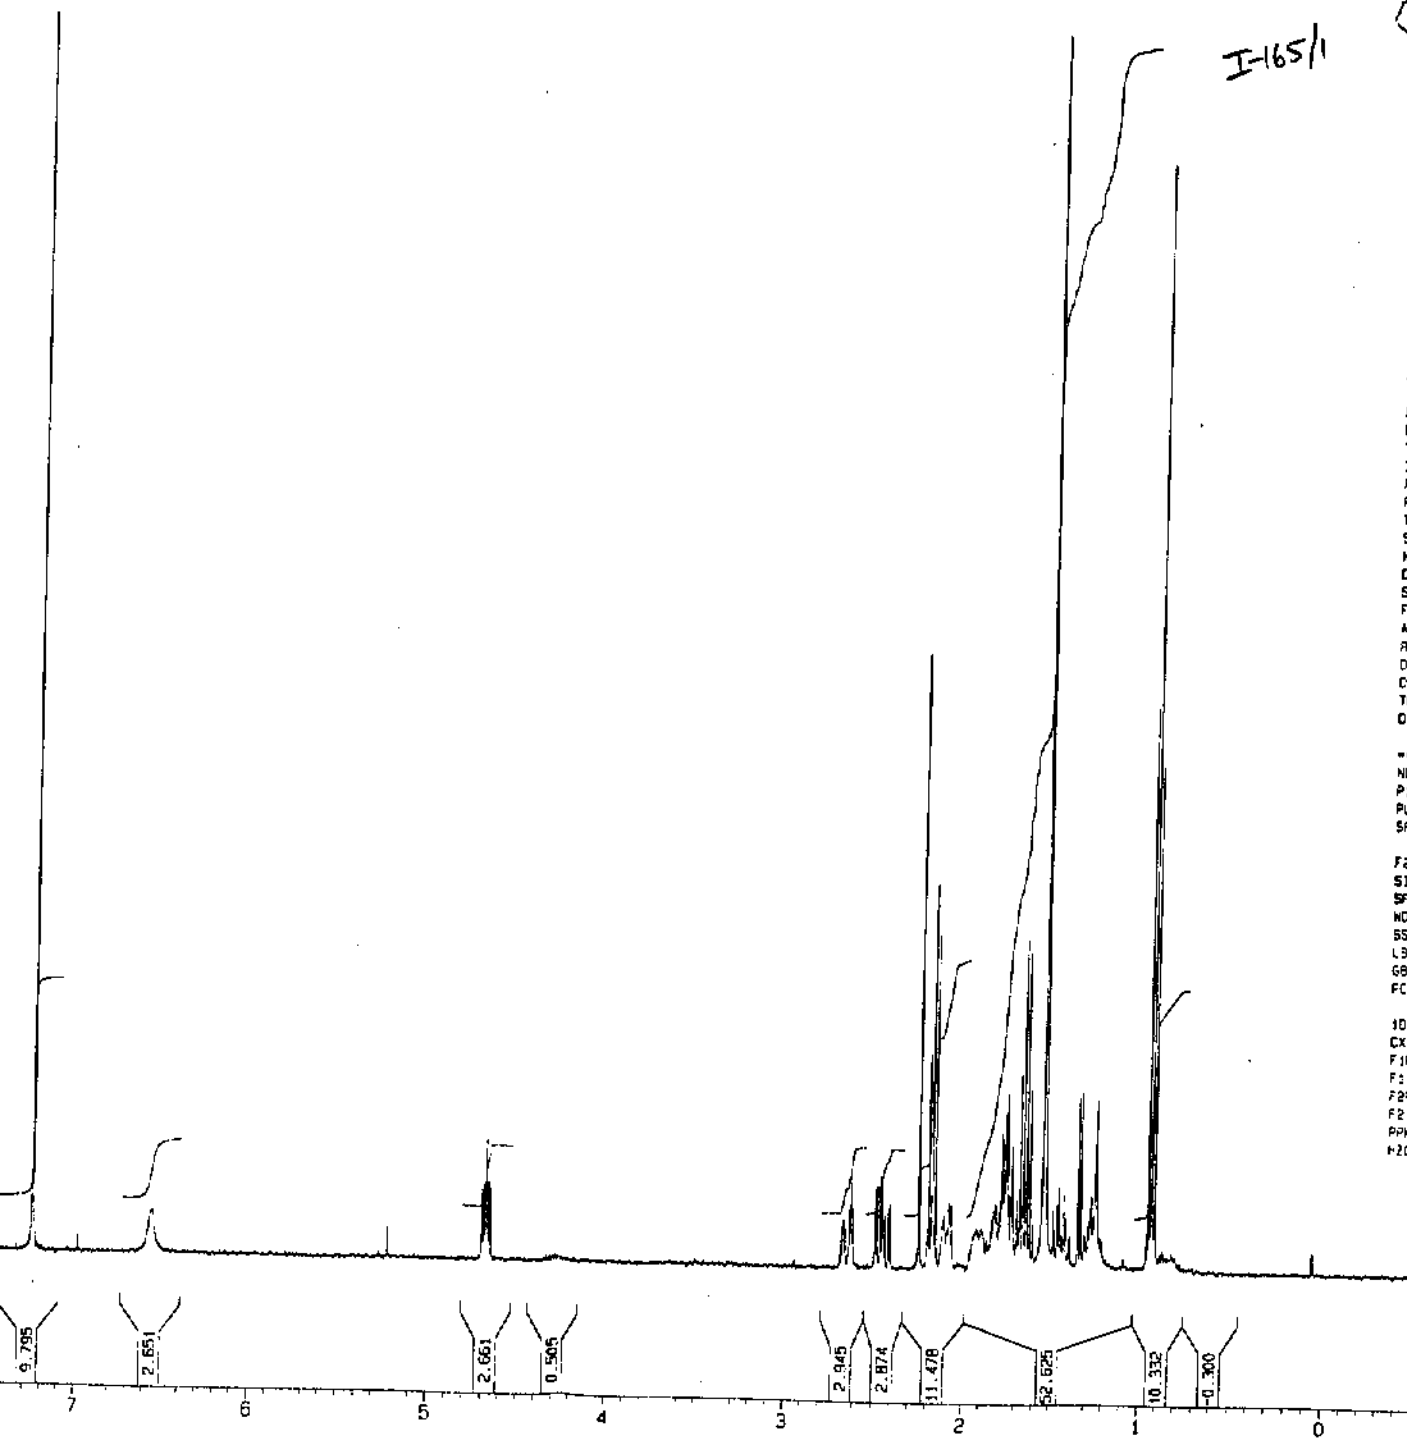

ppm

Standard 13C CRX-500  
FGG 1\_31\_2

210.38

172.21

77.21  
77.00  
76.79

58.75

41.53  
38.49

32.88  
28.97  
27.57

23.06  
19.02

13.65

I-165/1

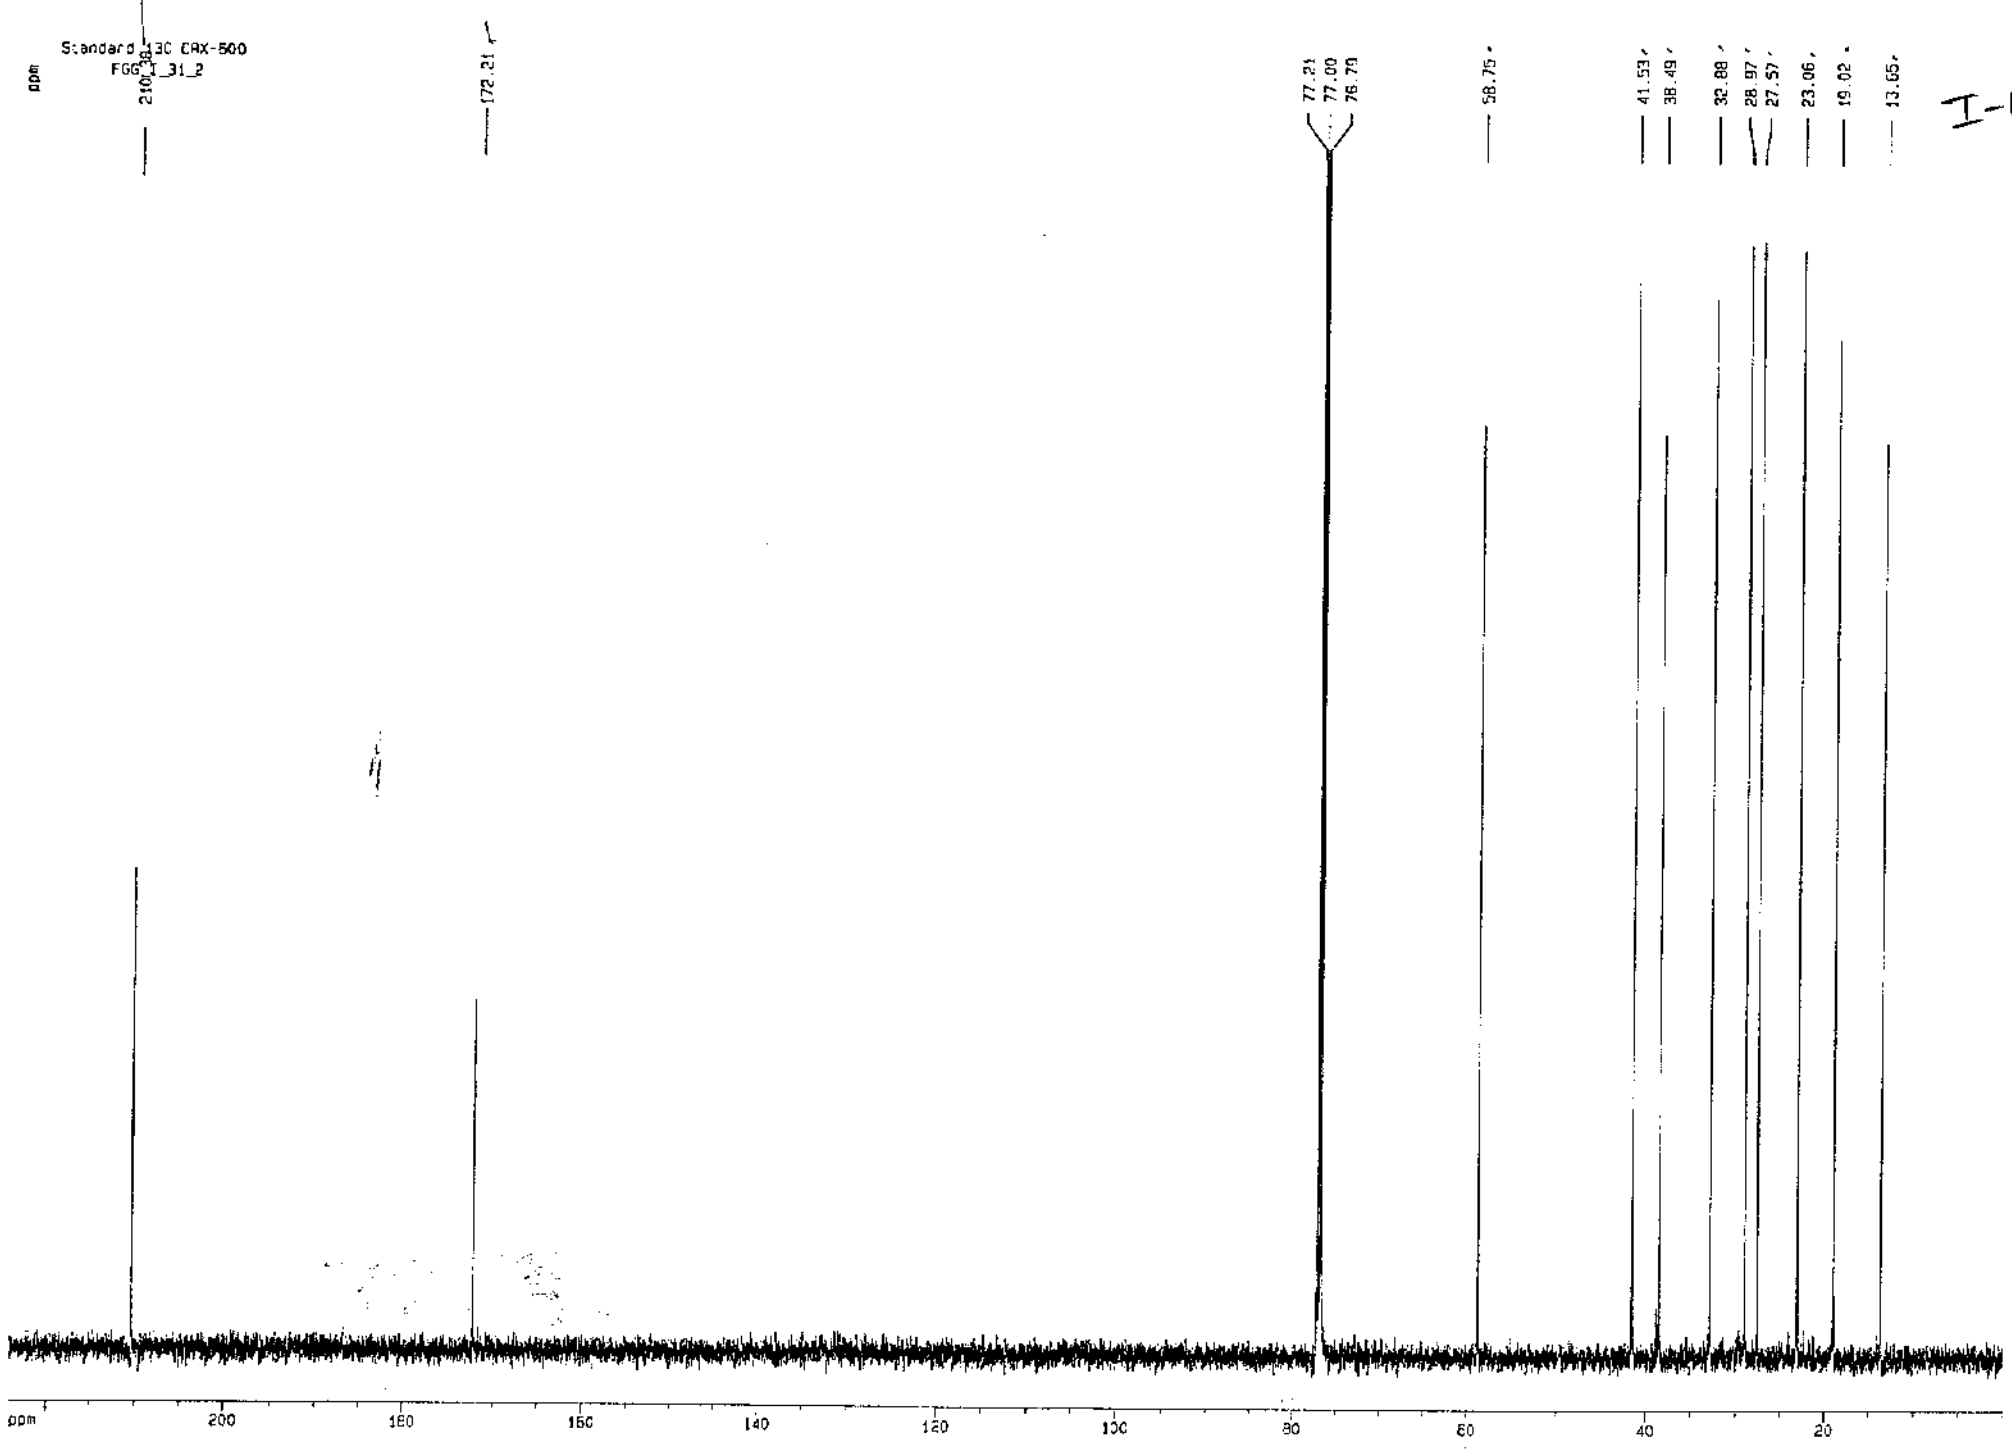

200 180 160 140 120 100 80 60 40 20

FGG-I-31/2

I-165/1

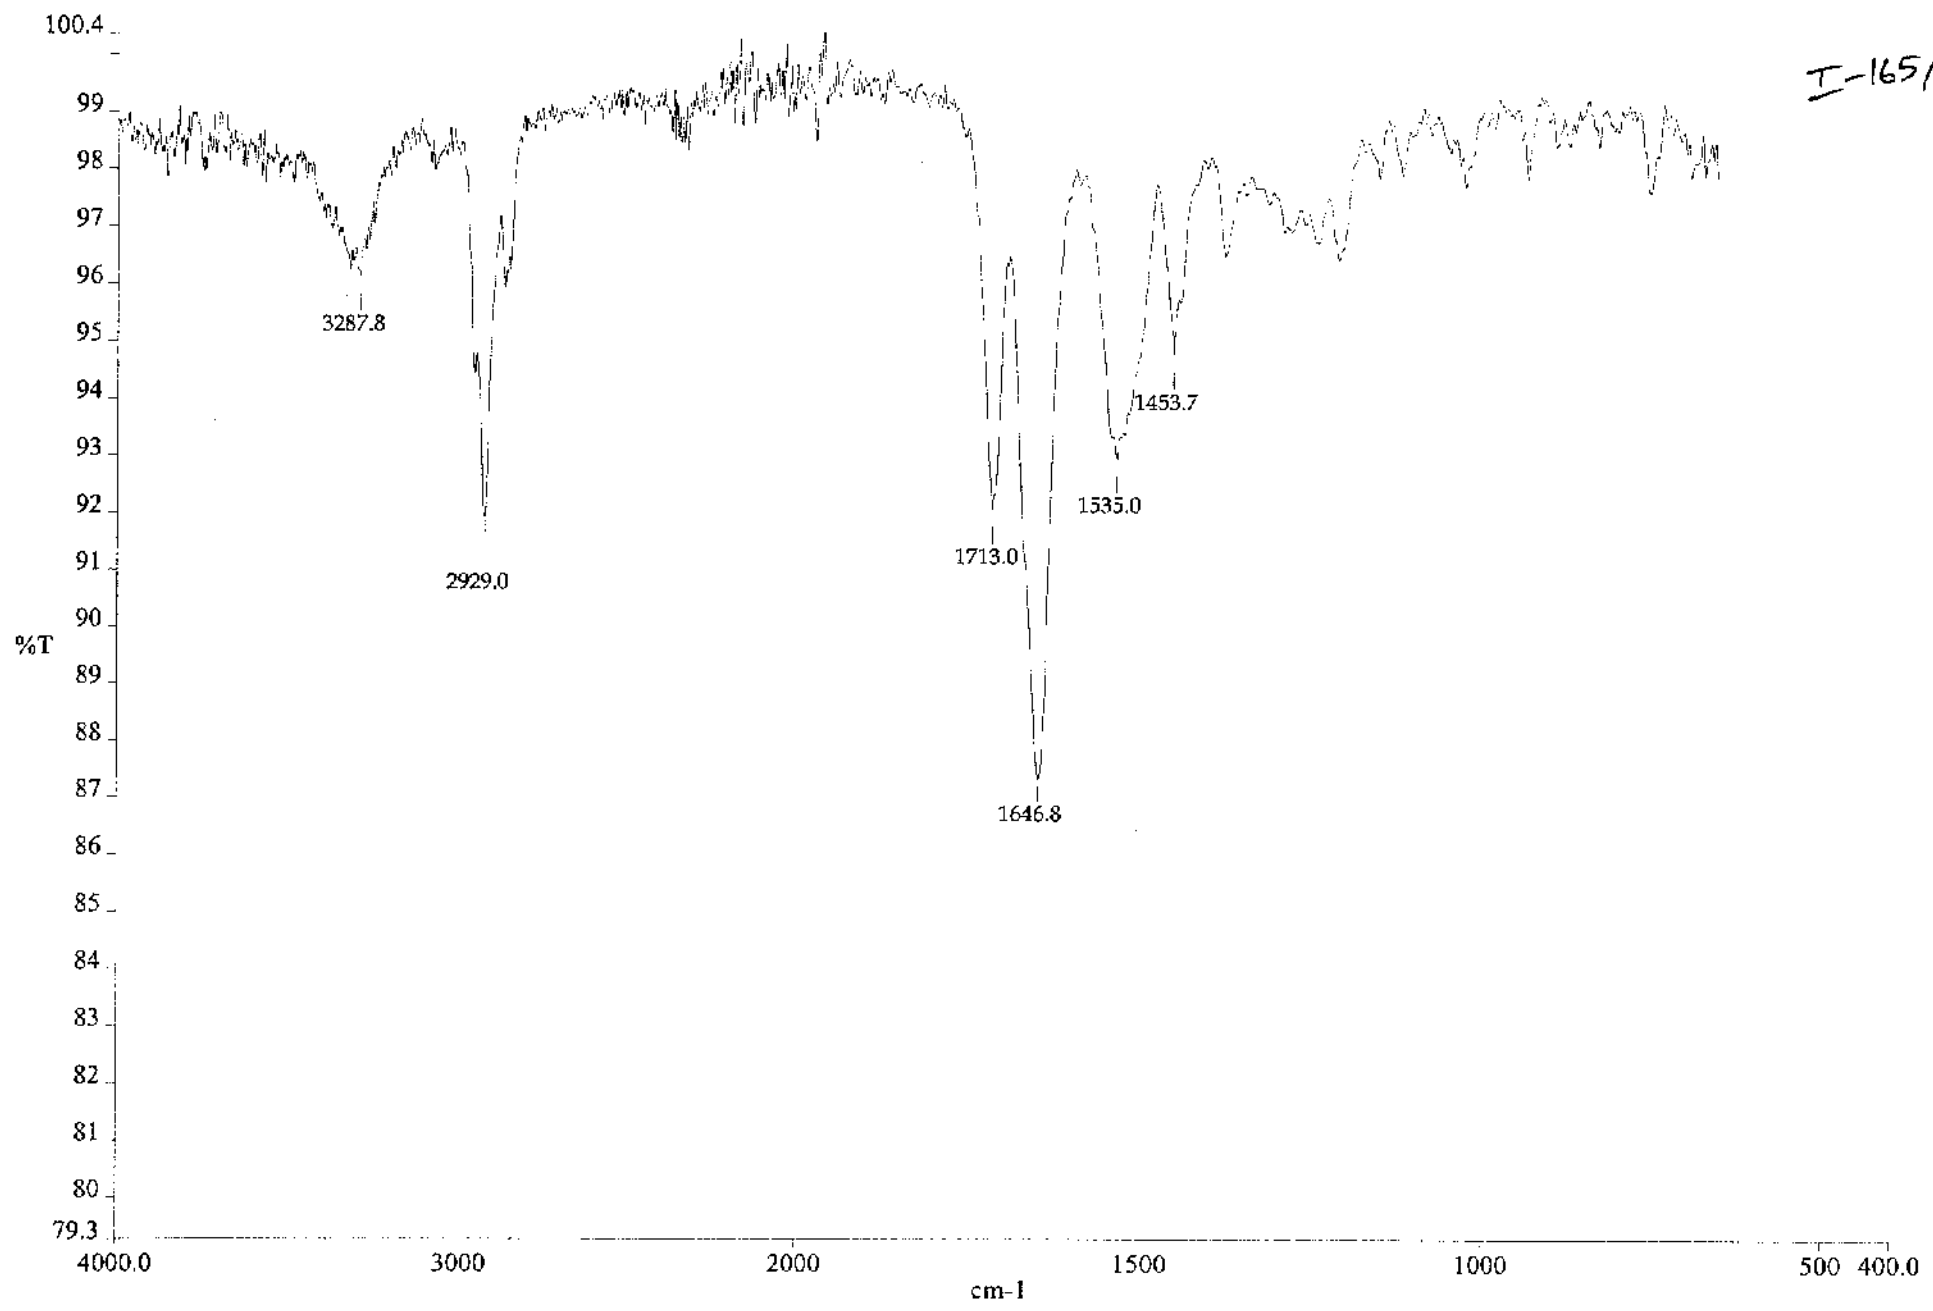

c:\pel\_data\spectra\fgg-i-2.sp

I-107/2

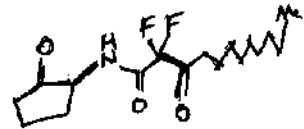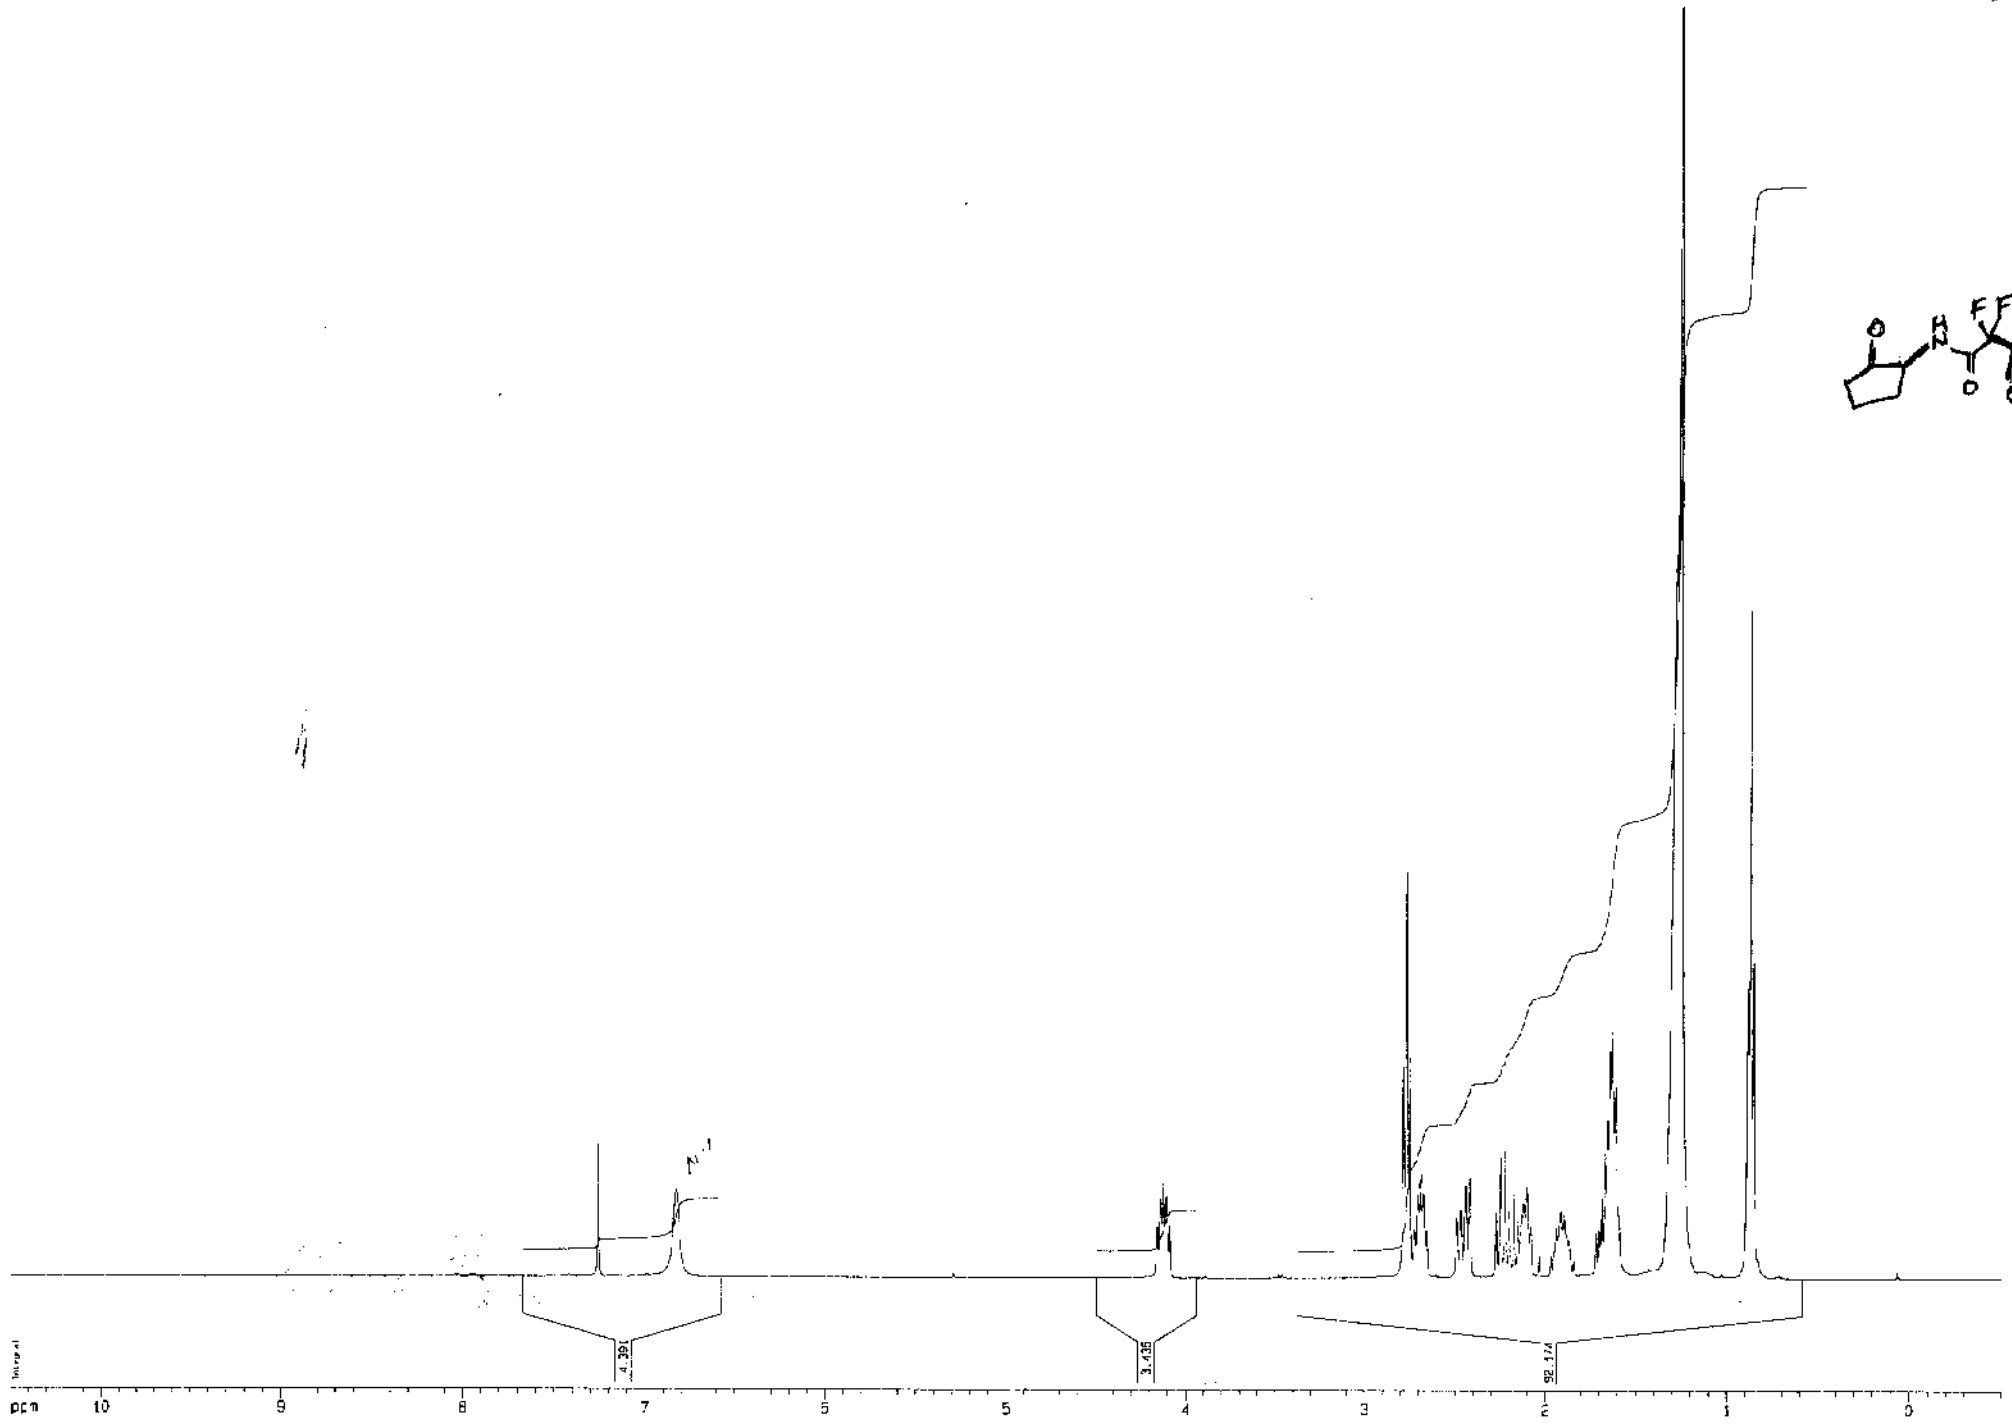

ppm

213.181

198.698  
198.427

162.096

109.450

77.720  
77.403  
77.085

58.254

37.844  
34.973  
32.219  
29.722  
29.622  
29.594  
23.028  
22.811  
18.443  
14.466

I-107/2

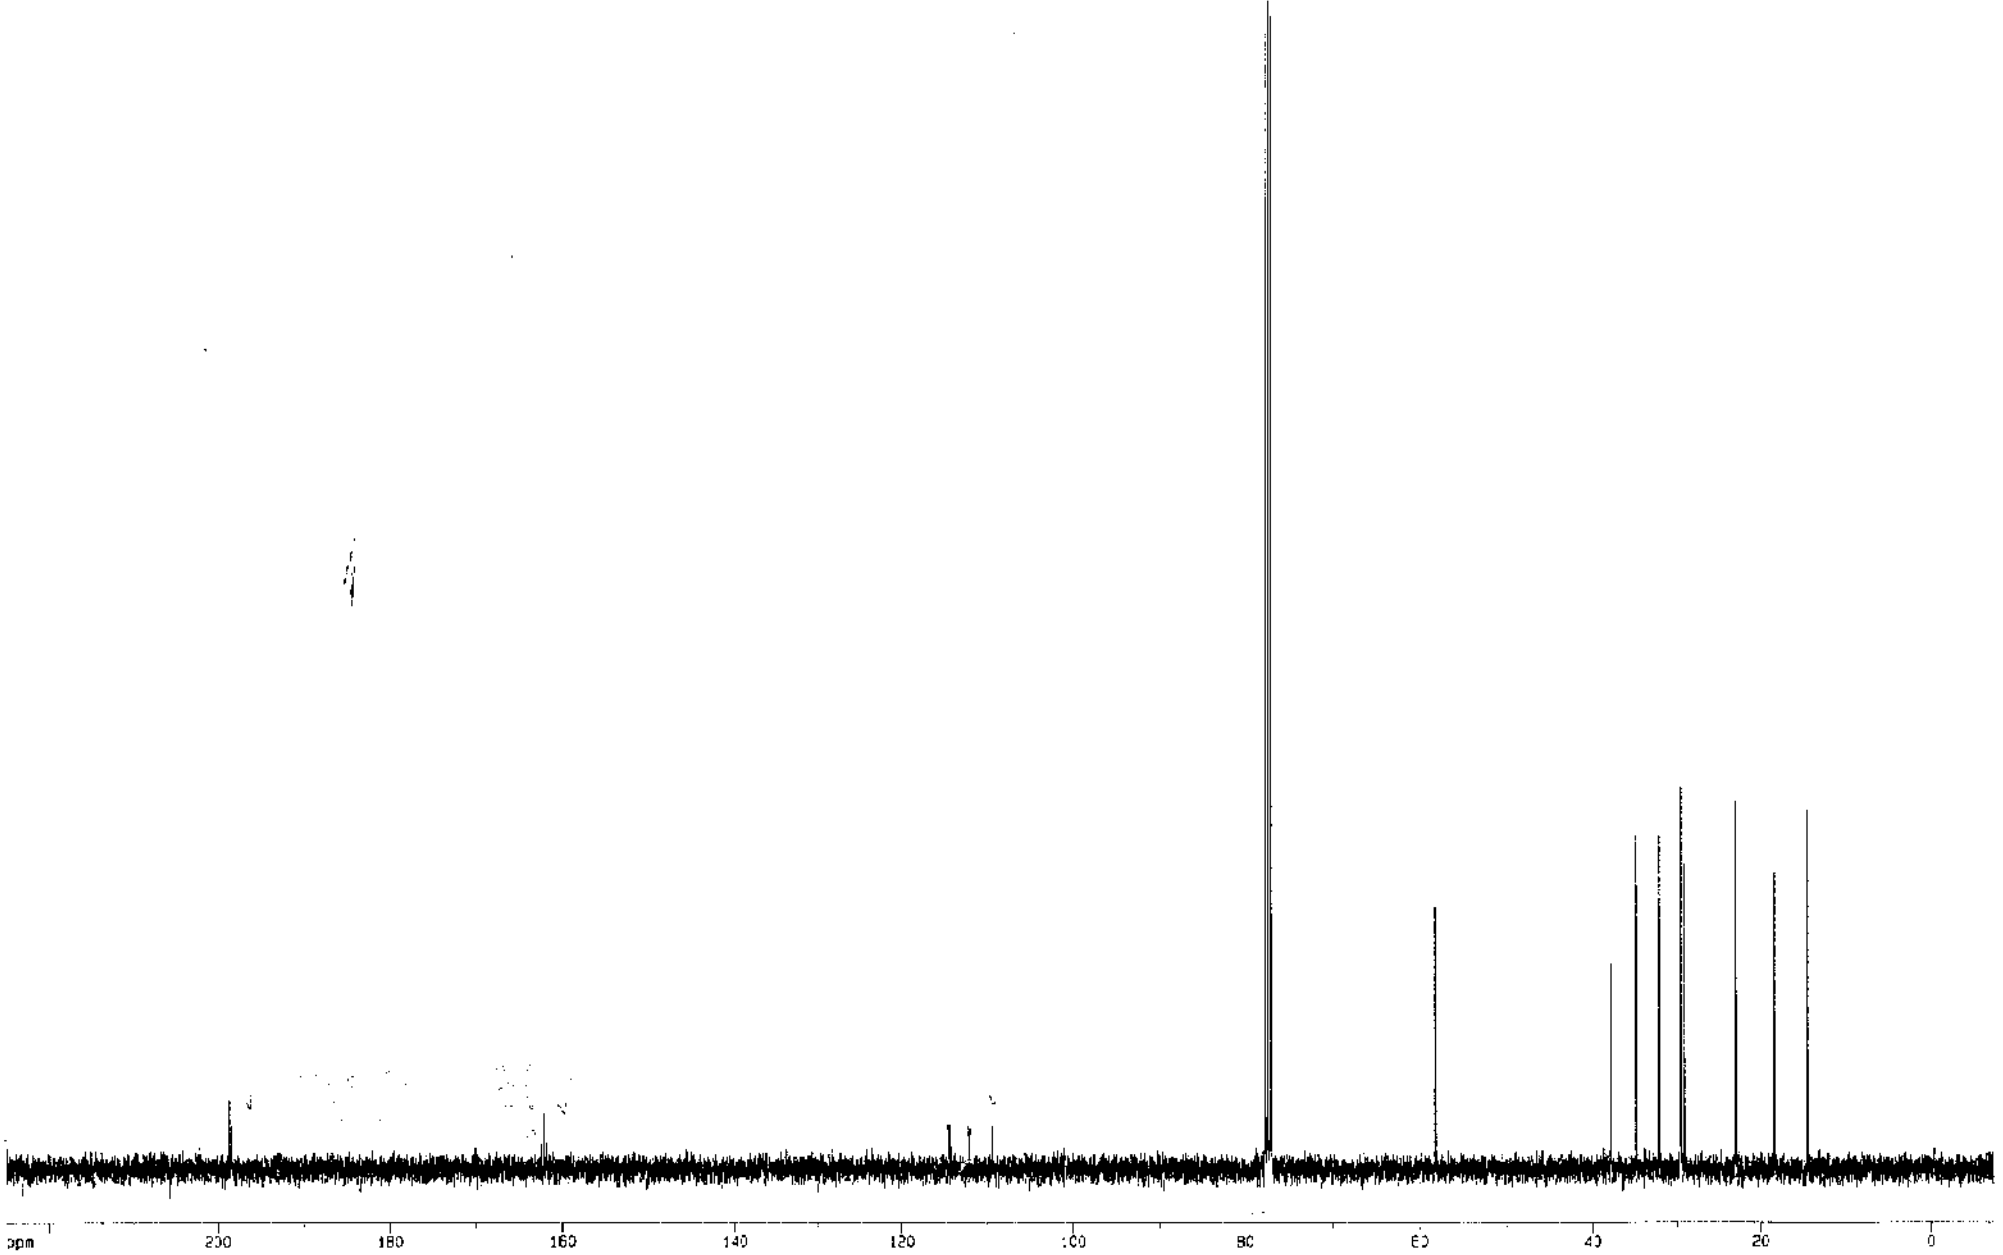

ppm

200

180

160

140

120

100

80

60

40

20

0

DPX400 fluorine  
fluorineCPD.std CDC13 /disk2 service 62

I-107/2

<sup>19</sup>F NMR

ppm

-115.01  
-115.03

Current Gate Parameters  
NAME svl-05-107-2  
EXPNO 10  
PROCNO 1

F2 - Acquisition Parameters  
Date\_ 20220701  
Time 18.06  
INSTRUM dpx400  
PROCNO 5 see QNP IH  
PULPROG zg30hgen  
TC 262144  
SOLVENT CDC13  
NS 250  
DS 4  
SWH 75187.965 Hz  
FIDRES 0.256813 Hz  
AQ 1.7423076 sec  
RG 512  
DN 6.650 .sec  
DE 6.00 .sec  
TE 302.0 K  
D1 1.00000000 sec  
d11 0.03000000 sec  
d12 0.05000000 sec

----- CHANNEL f1 -----  
NUC1 19F  
P1 12.00 usec  
PL1 -6.00 dB  
SFO1 376.4428882 MHz

----- CHANNEL f2 -----  
PULPROG waltz16  
NUC2 1H  
PCPD2 100.00 usec  
PL2 0.00 dB  
PL12 20.00 dB  
SFO2 400.1316005 MHz

F2 - Processing parameters  
SI 262144  
SF 376.4984577 MHz  
WDW E4  
SSB 0  
LB 0.30 Hz  
GB 0  
PC 1.00

1D NMR plot parameters  
Ck 38.00 cm  
F1 10.000 ppm  
F1 3764.98 Hz  
F2F -200.000 ppm  
F2 -75289.60 Hz  
P1CHN 5.52632 ppm/cm  
H2CH 2085.64917 Hz/cm

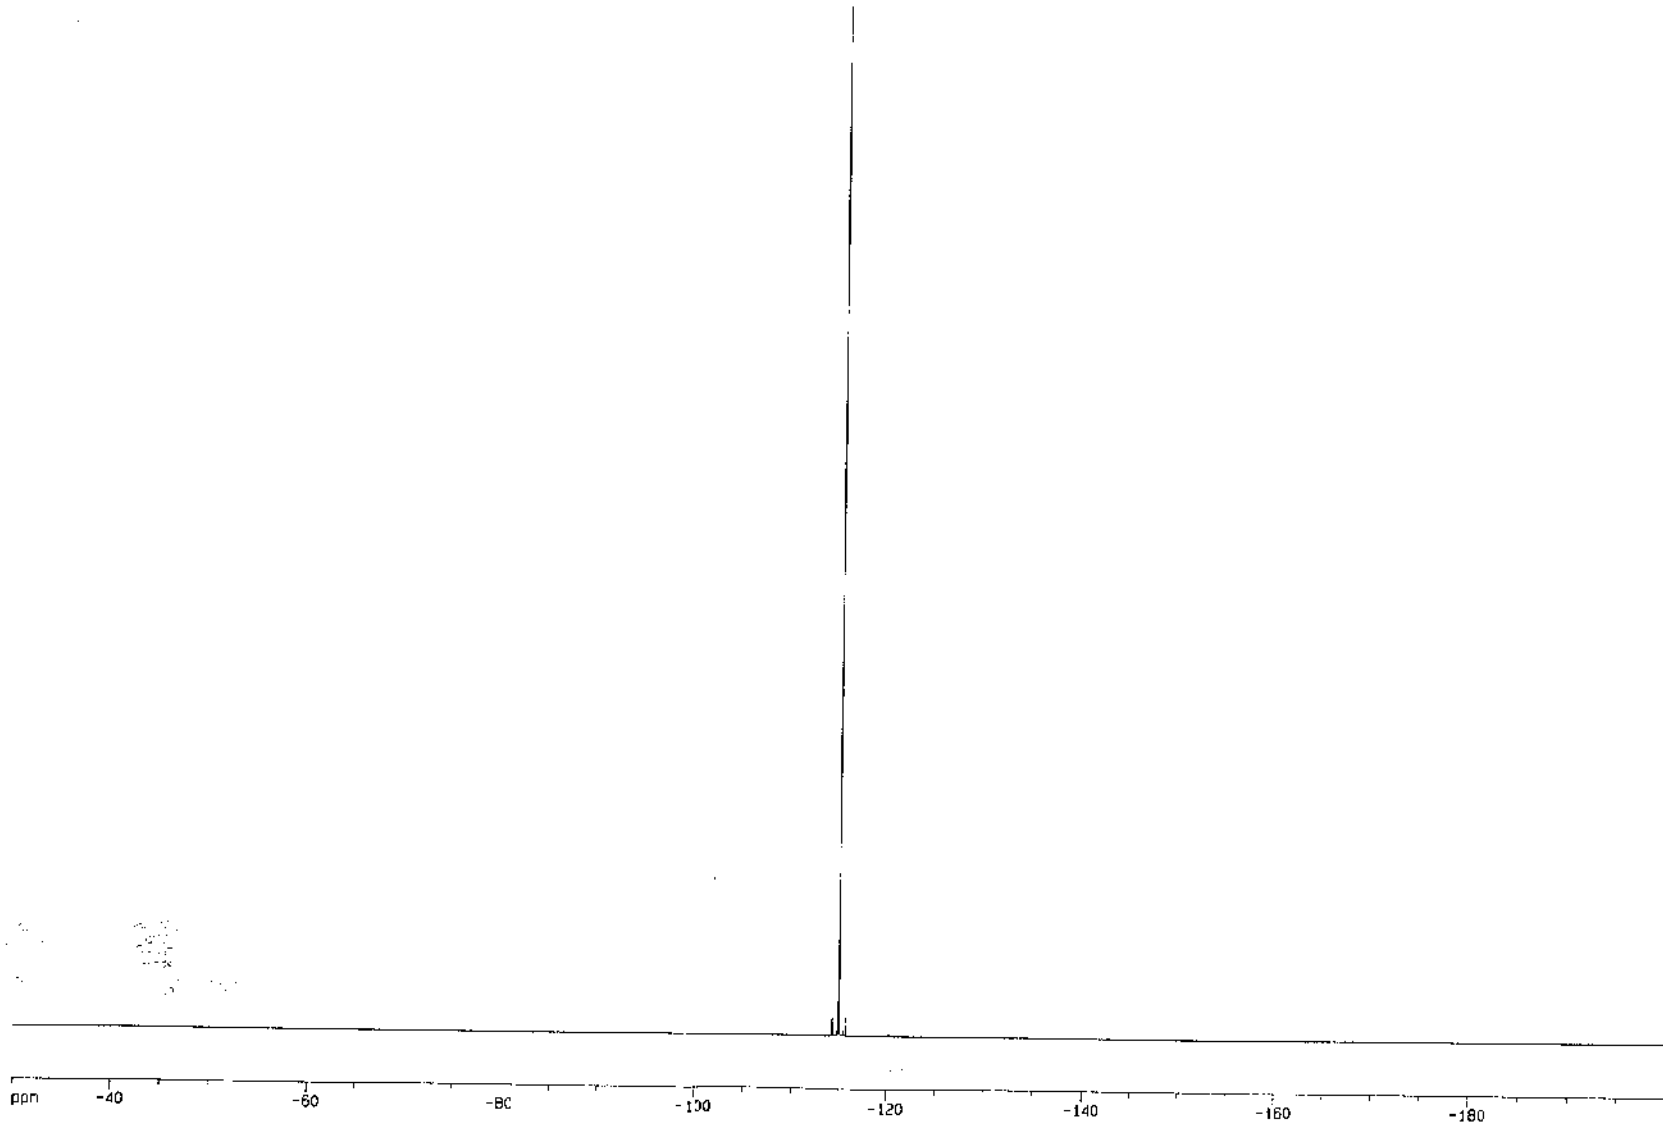

ppm -40 -60 -80 -100 -120 -140 -160 -180

T-107/2

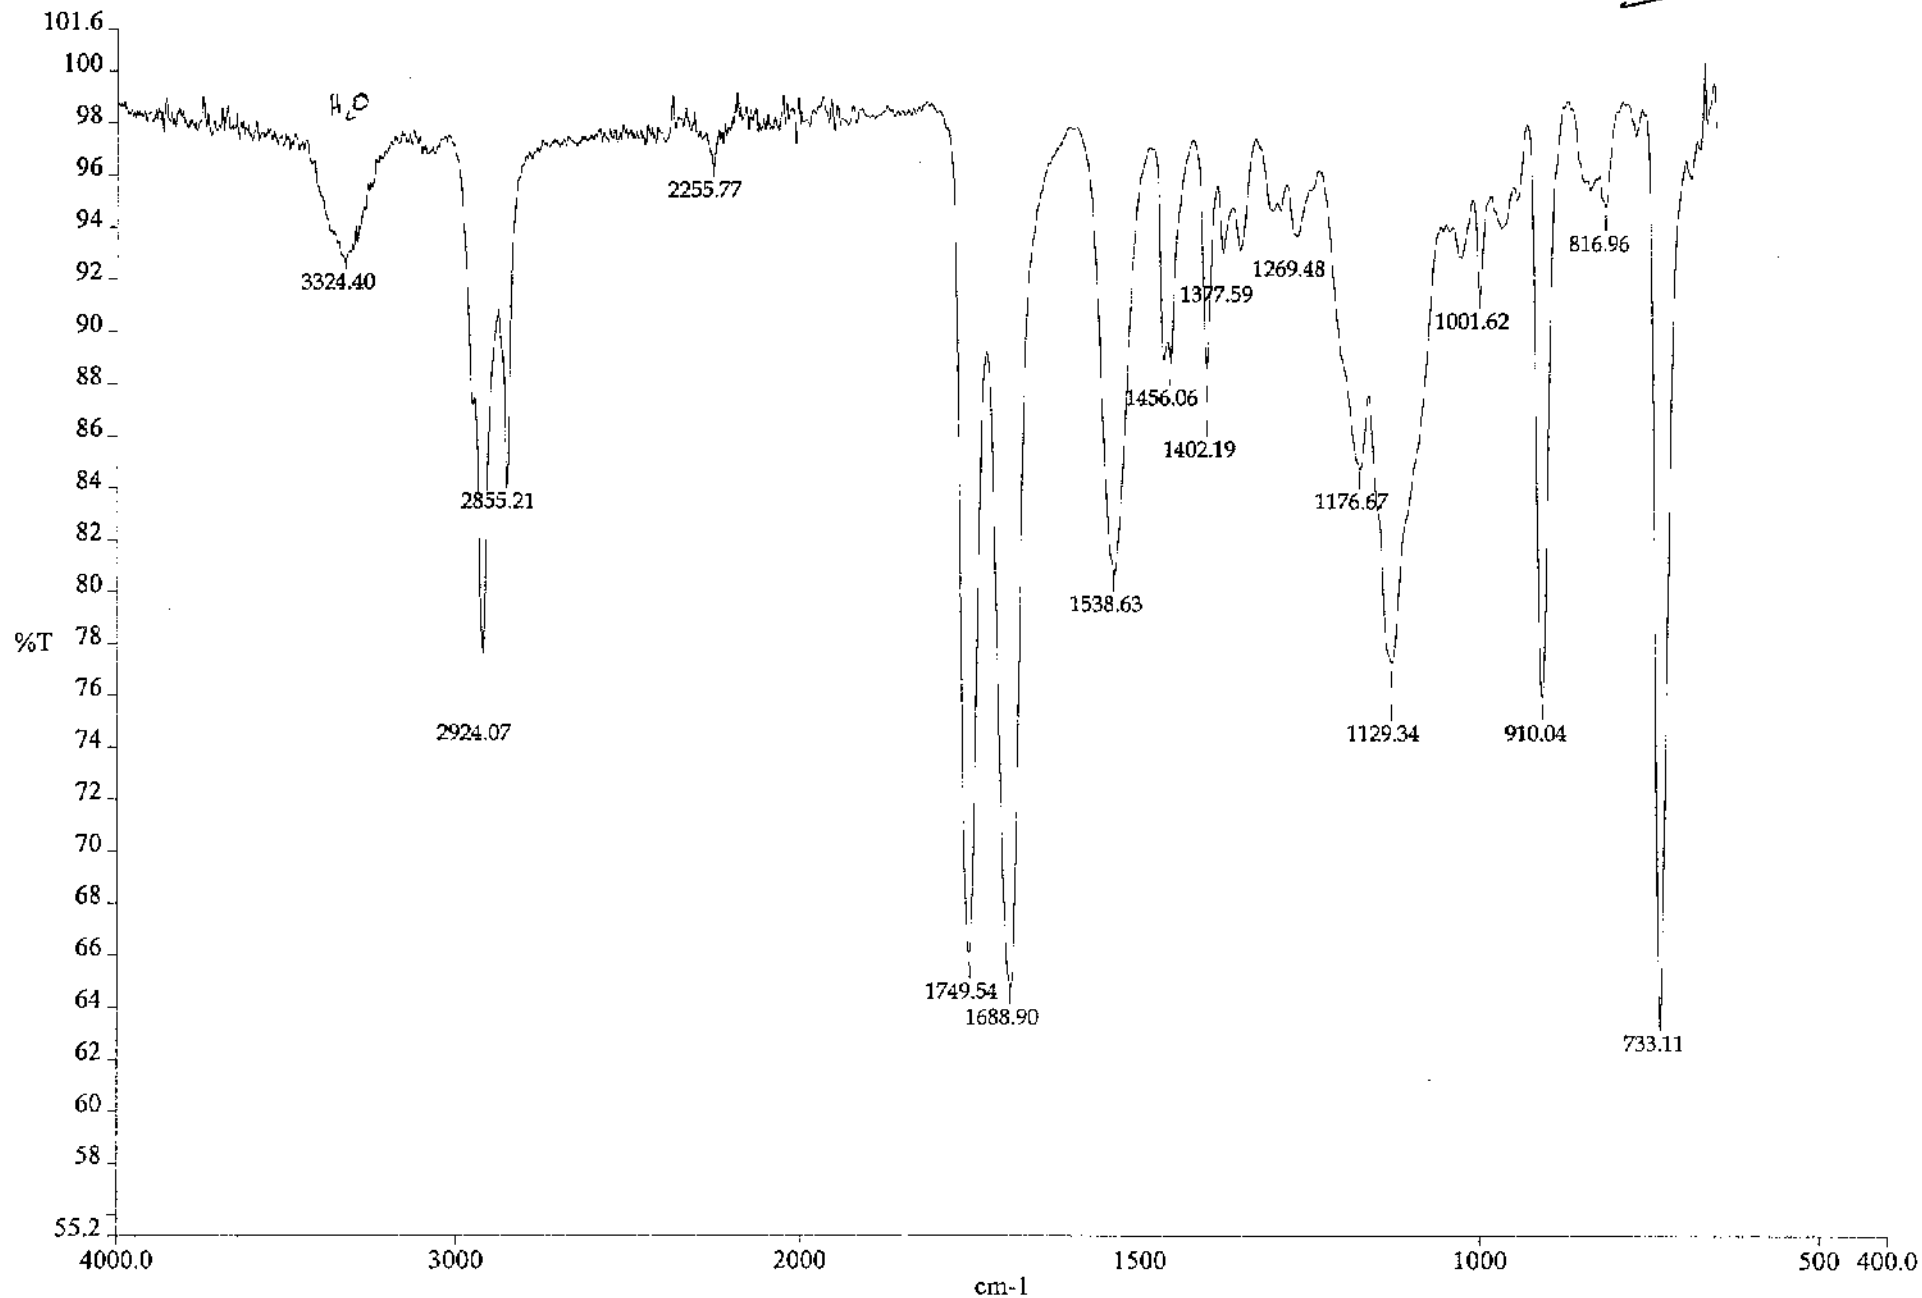

I-108/2

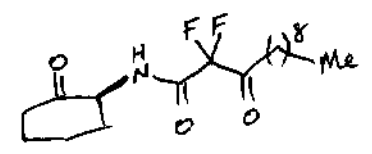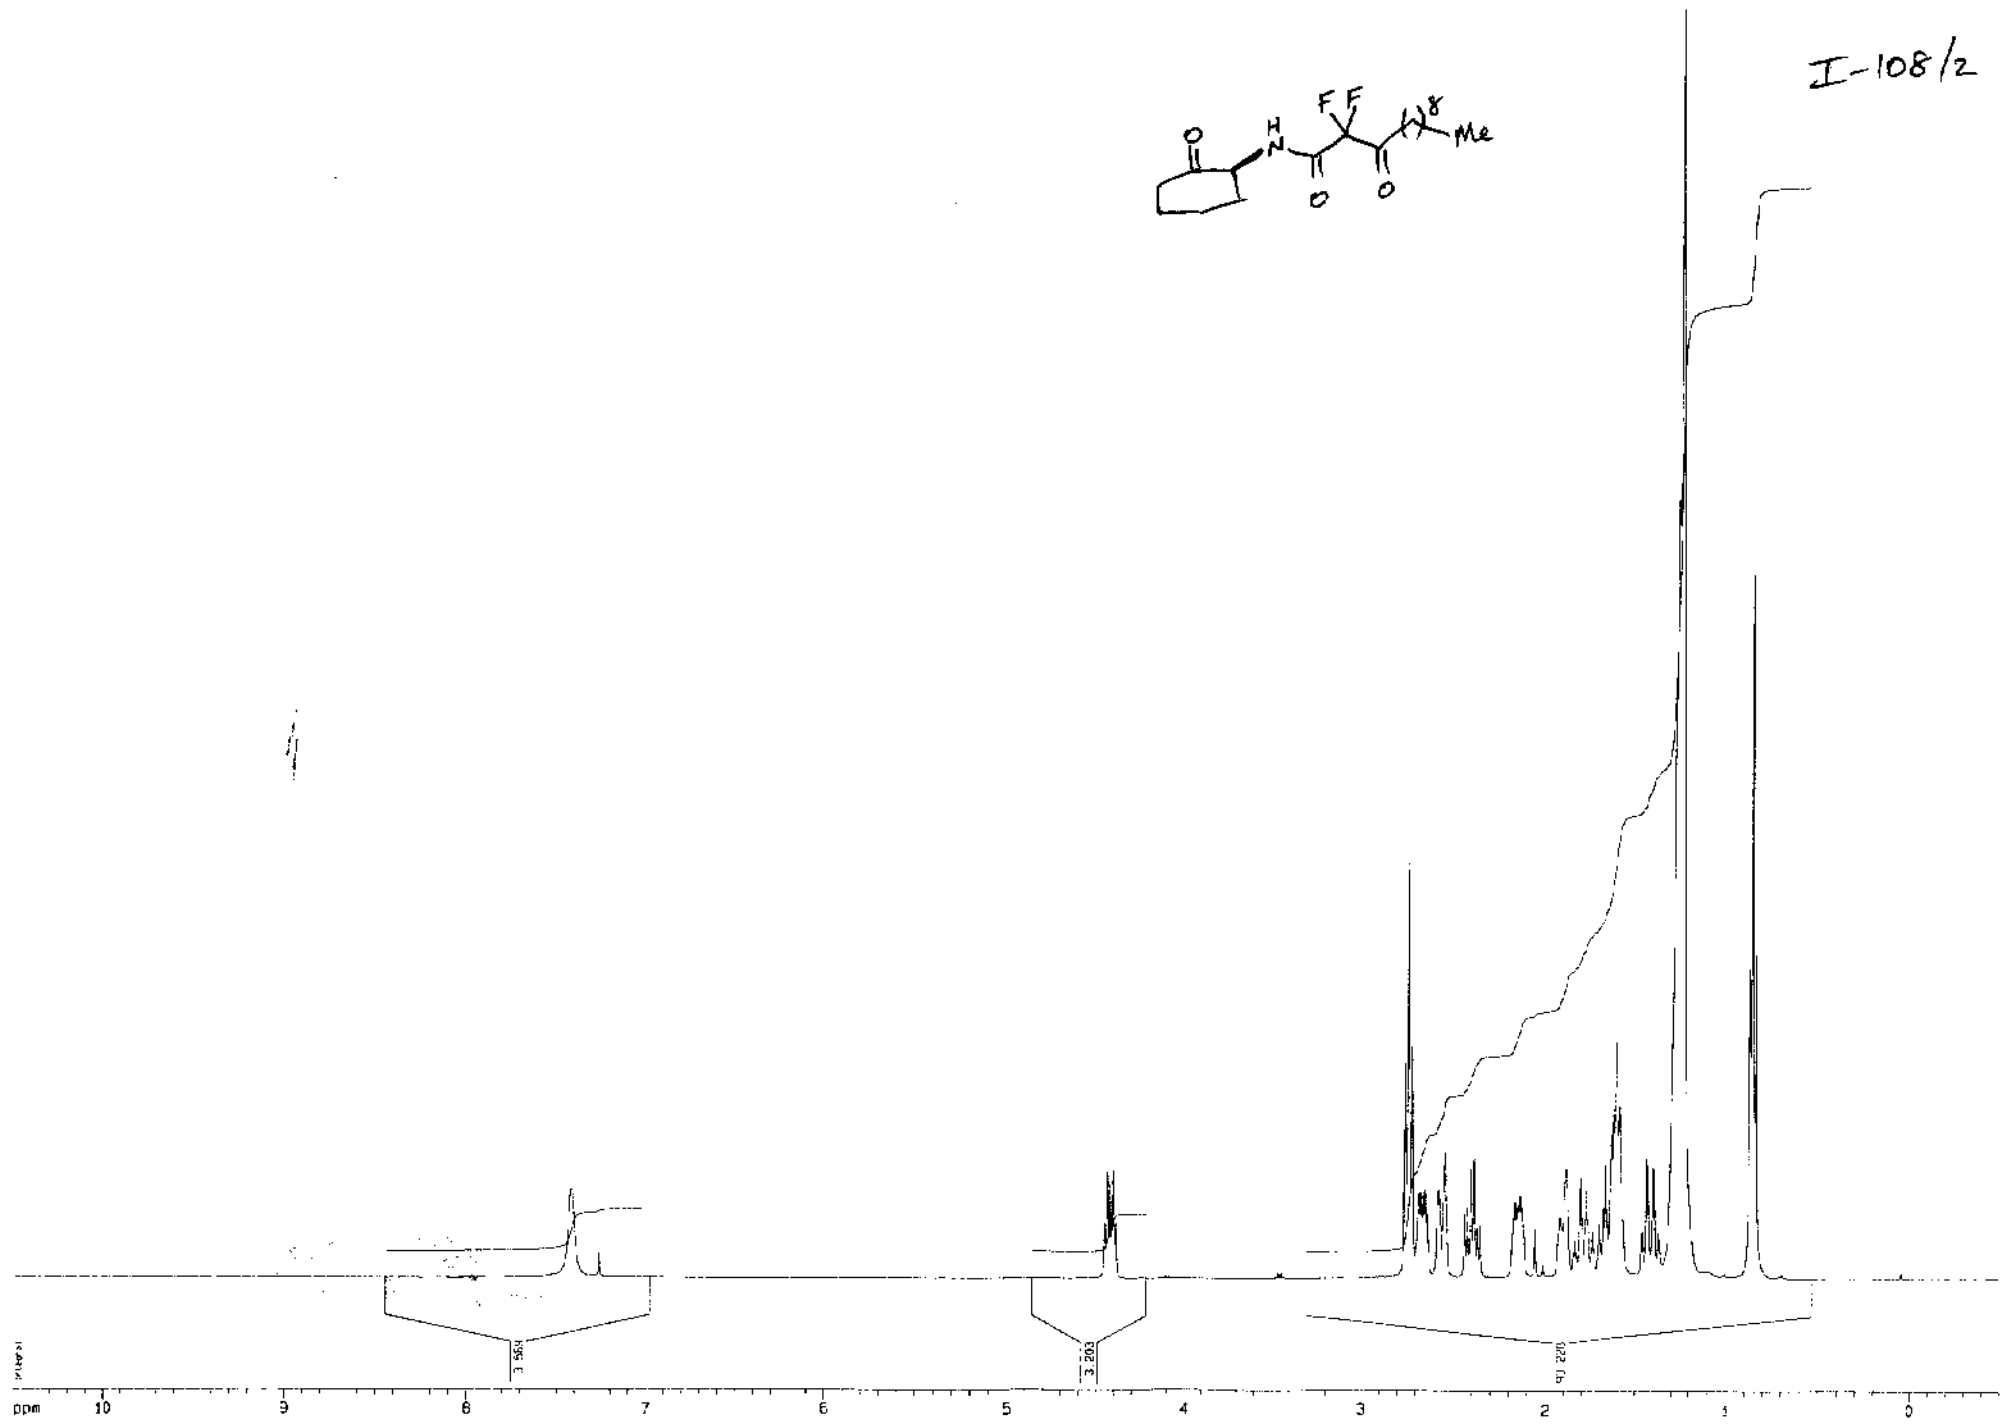

ppm

115.12  
115.15

Current Data Parameters  
NAME sv1-ds-108-2  
EXPNO 10  
PROCNO 1

F2 - Acquisition Parameters  
Date\_ 20020701  
Time 18.25  
INSTRUM dp400  
PROBHD 5 mm QNP 1H  
PULPROG zgpg30  
TC 262144  
SOLVENT CDCl3  
NS 256  
DS 0  
SWH 75.87569 Hz  
FIDRES 0.286019 Hz  
AQ 1.7433076 sec  
RG 512  
CW 6.650 usec  
DE 6.00 usec  
TE 300.0 K  
D1 1.0000000 sec  
d11 0.0300000 sec  
d12 0.0002000 sec

----- CHANNEL f1 -----  
NUC1 19F  
P1 12.00 usec  
PL1 -6.00 dB  
SFO1 376.445892 MHz

----- CHANNEL f2 -----  
CPDPRG2 waltz16  
NUC2 1H  
PCPD2 100.00 usec  
PL2 0.00 dB  
PL12 20.00 dB  
SFO2 400.136005 MHz

F2 - Processing parameters  
SI 262144  
SF 376.4984577 MHz  
WDW EM  
SSB 0  
\_B 0.30 Hz  
GB 0  
PC 1.00

1D NMR plot parameters  
GX 38.00 cm  
F1P -77.375 ppm  
F1 -29131.68 Hz  
F2P -154.760 ppm  
F2 -52867.01 Hz  
PQWCH 2.03645 ppm/cw  
HZCM 756.71936 Hz/cm

ppm

I-108/2

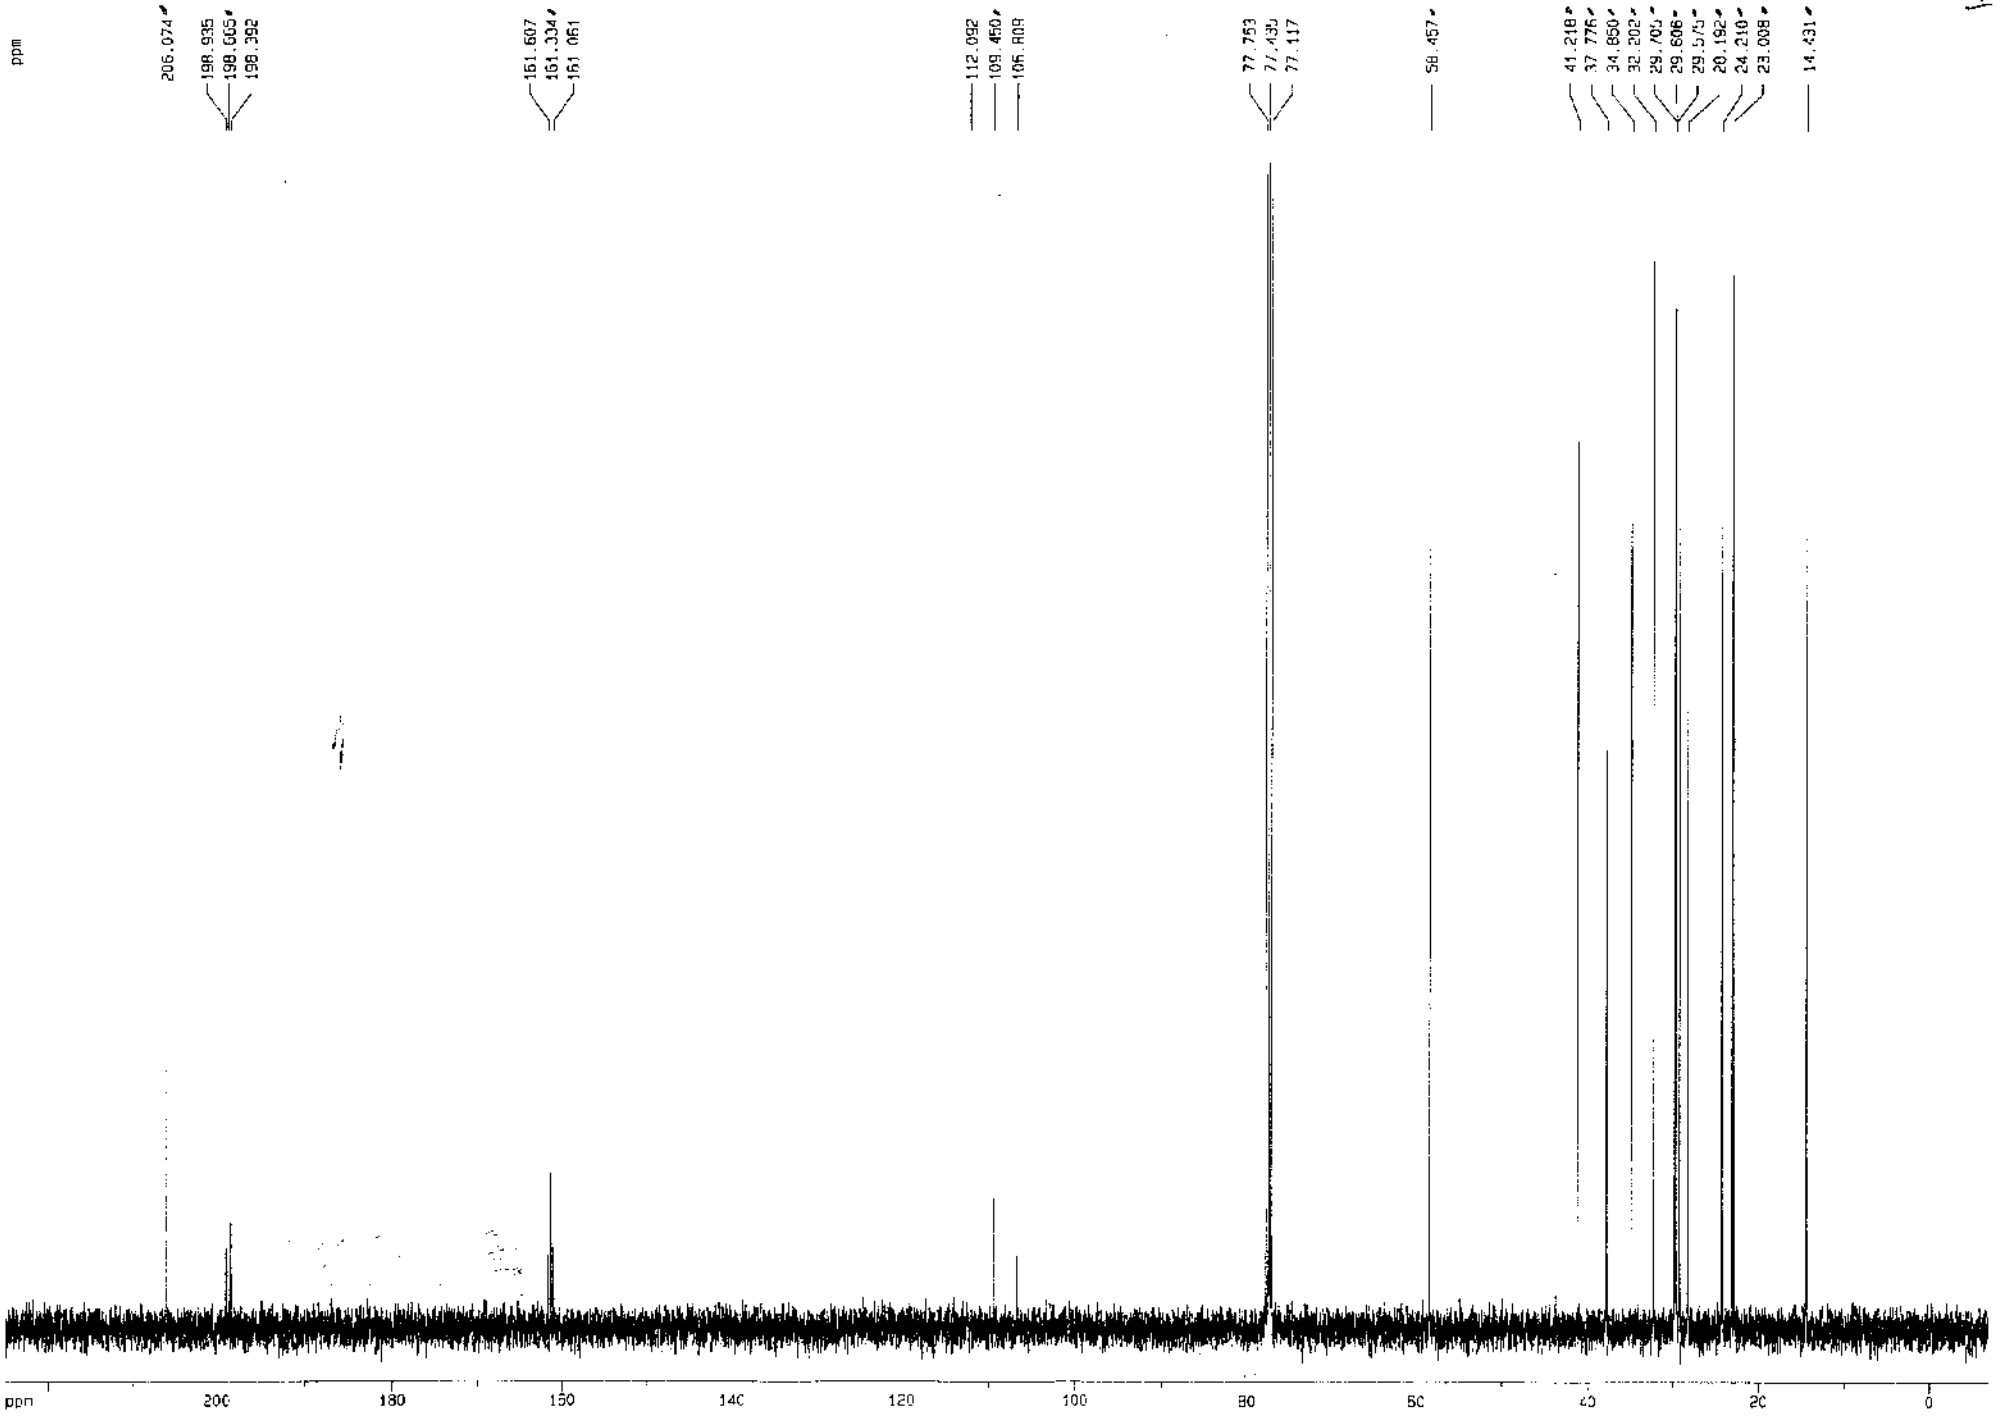

T-108/2

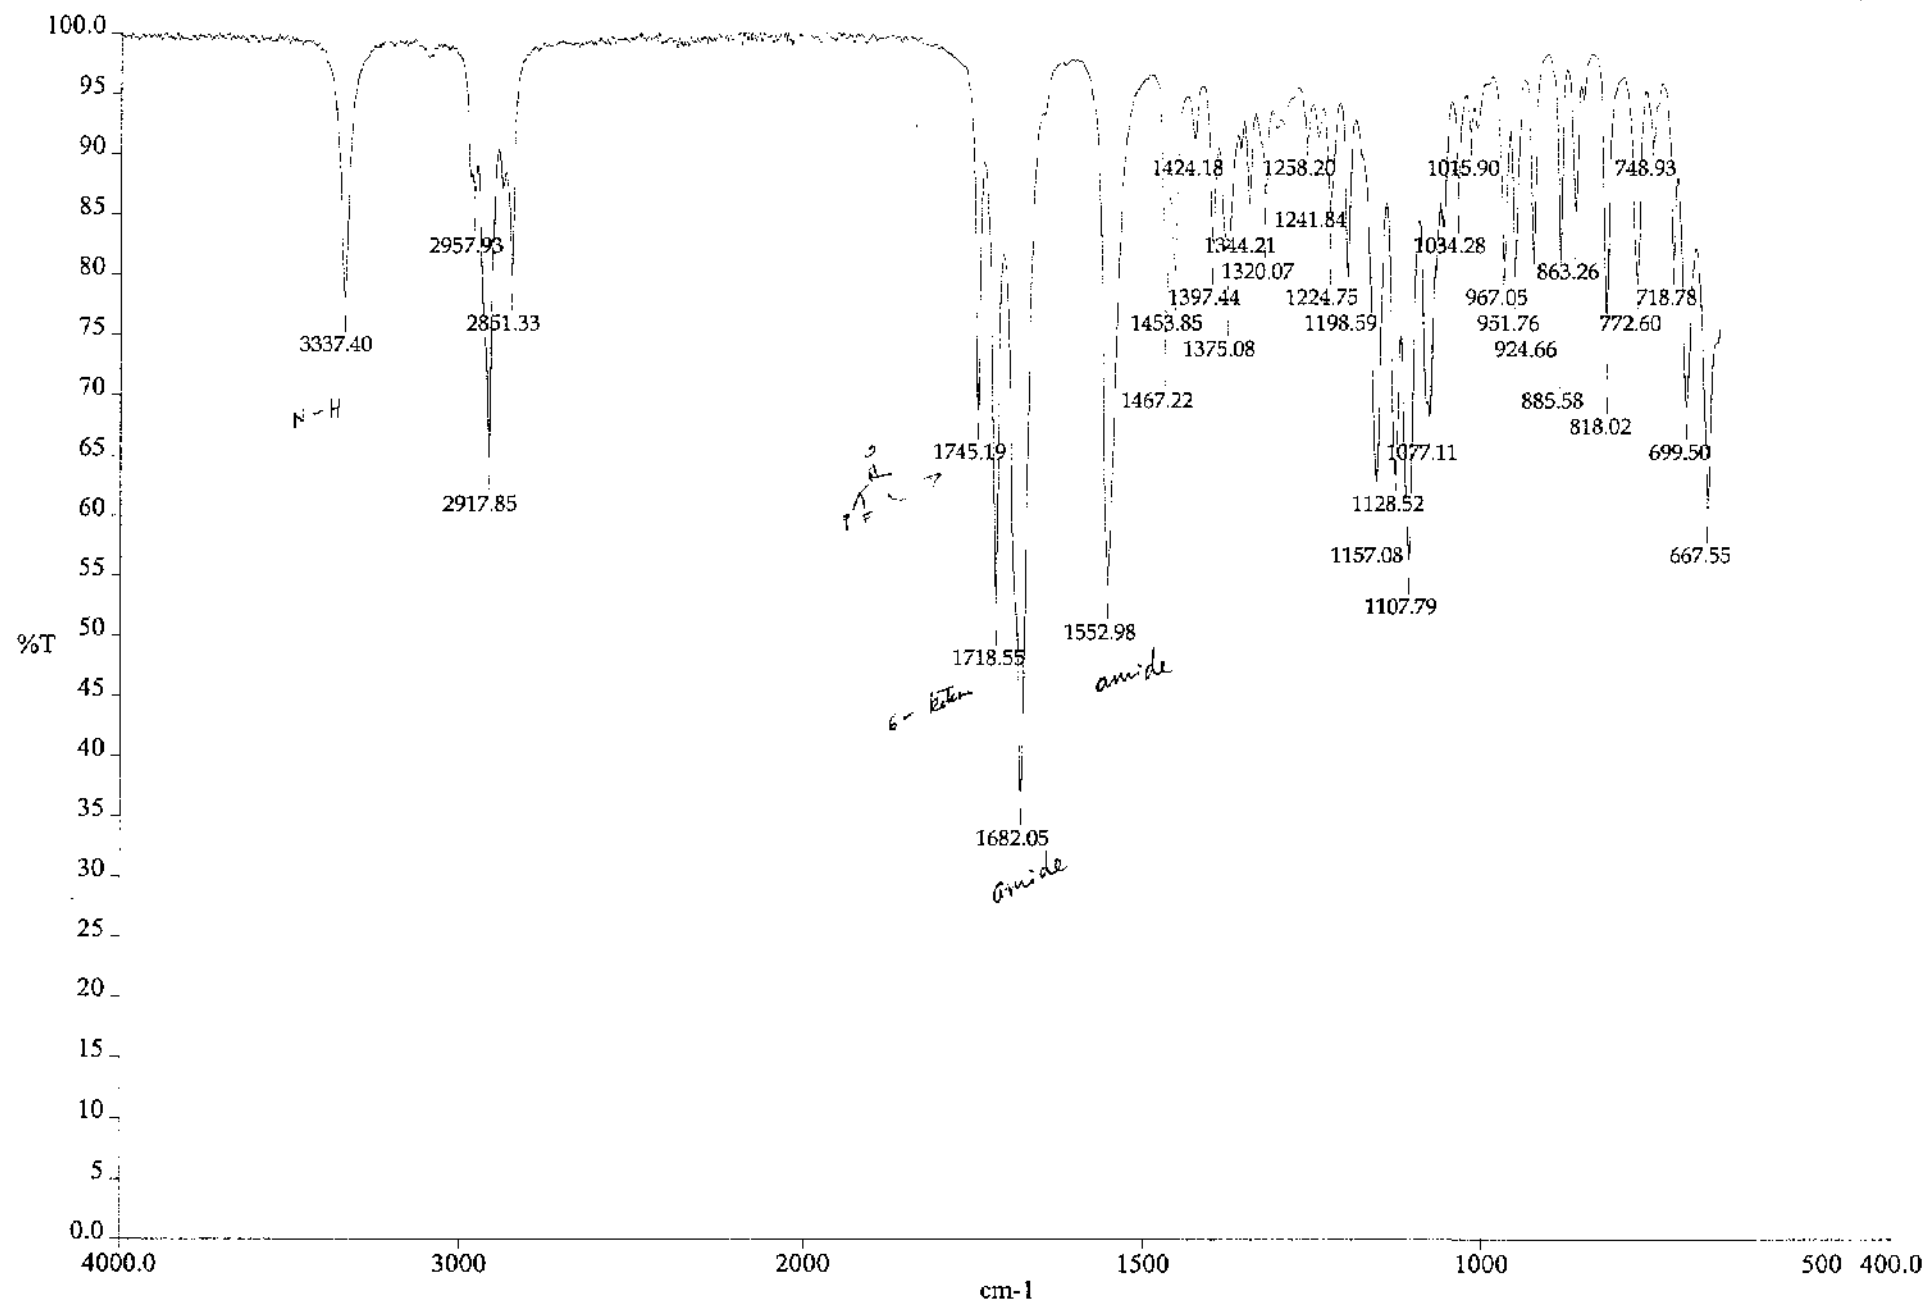

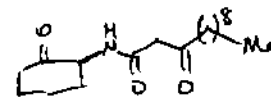

V54376  
 DS/GLT-1-131  
 Gemma Thomas  
 1H  
 CDC13  
 Position: 56

Current Data Parameters  
 NAME V54376  
 EXPNO 10  
 PROCNO 1

F2 - Acquisition Parameters  
 Date\_ 20040513  
 Time 15.22  
 INSTRUM gpc400  
 PROBHD 5 mm QNP 1H  
 PULPROG zgpg30  
 TD 32768  
 SOLVENT CDCl3  
 NS 16  
 DS 2  
 SWH 8223.688 Hz  
 FIDRES 0.250967 Hz  
 AQ 1.9523444 sec  
 RG 362  
 DH 60.800 usec  
 DE 6.00 usec  
 TE 300.0 K  
 D1 1.0000000 sec

\*\*\*\*\* CHANNEL f1 \*\*\*\*\*  
 NUC1 1H  
 P1 9.40 usec  
 PL1 0.00 dB  
 SFO: 400.1324710 MHz

F2 - Processing parameters  
 SI 32768  
 SF 400.1300135 MHz  
 KDW EM  
 ESSB C  
 LB 0.20 Hz  
 GB C  
 PC 1.00

1D NMR plot parameters  
 CX 35.00 cm  
 F1P 10.000 ppm  
 F1 400.130 Hz  
 F2P -0.500 ppm  
 F2 -200.07 Hz  
 PRMCM 0.30000 ppm/cm  
 HZCM 120.33900 Hz/cm

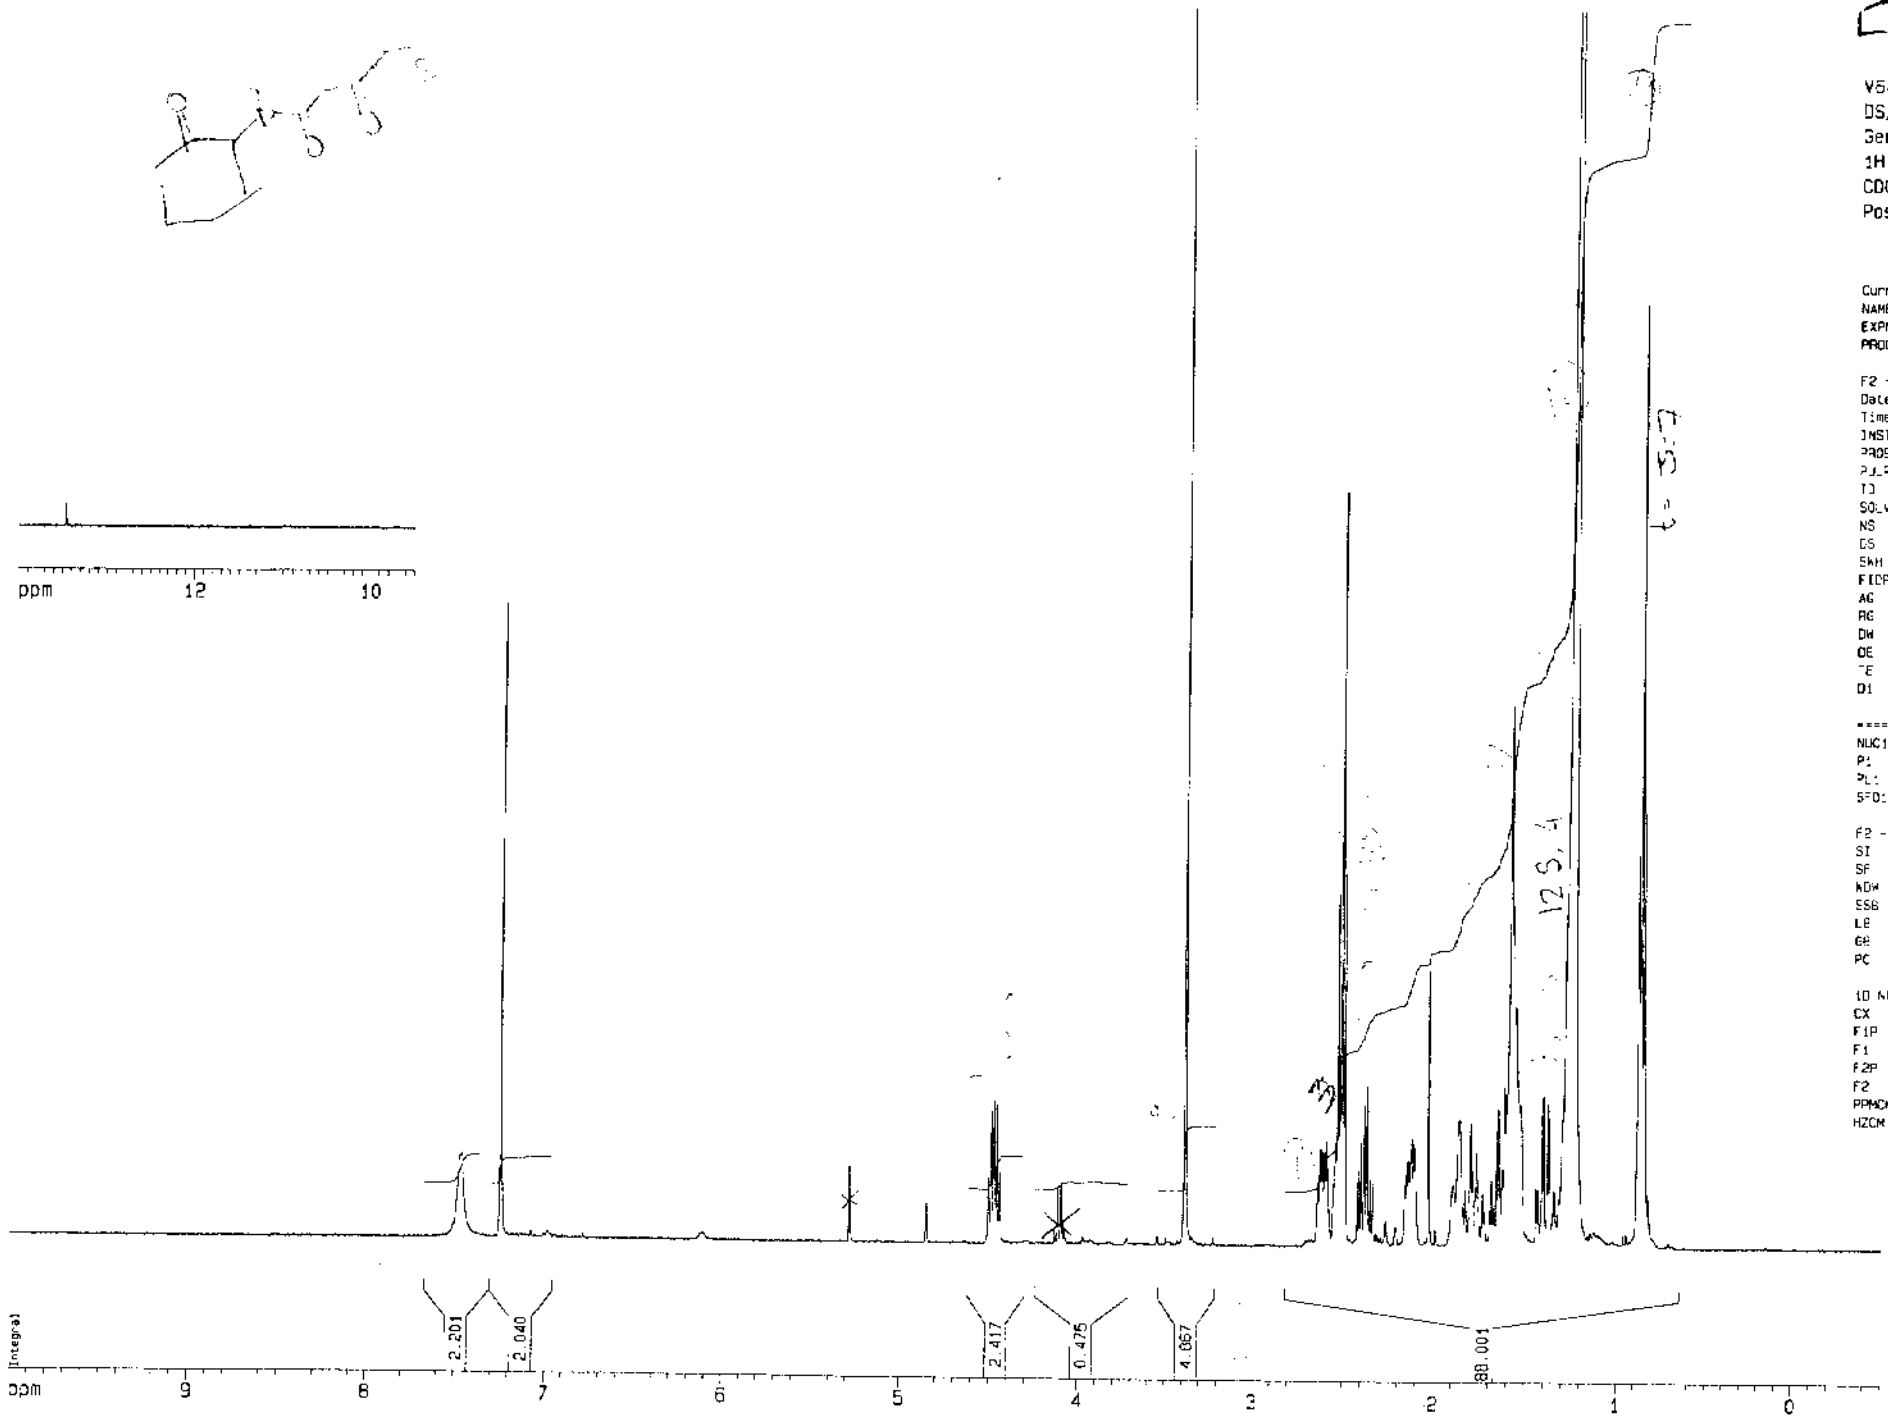

ppm

207.332  
206.288

165.756

77.725  
77.408  
77.090

58.614

49.751

44.116  
41.473

35.506  
32.228  
29.764

29.725  
29.615  
24.473

23.786  
23.027

14.456

glt-1-131

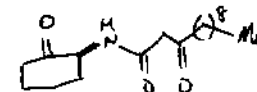

CH<sub>3</sub>

Q

Q

Q

CH

ppm

200

150

100

50

0

30

60

40

20

0

0

131

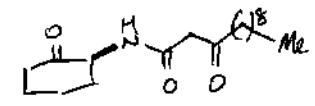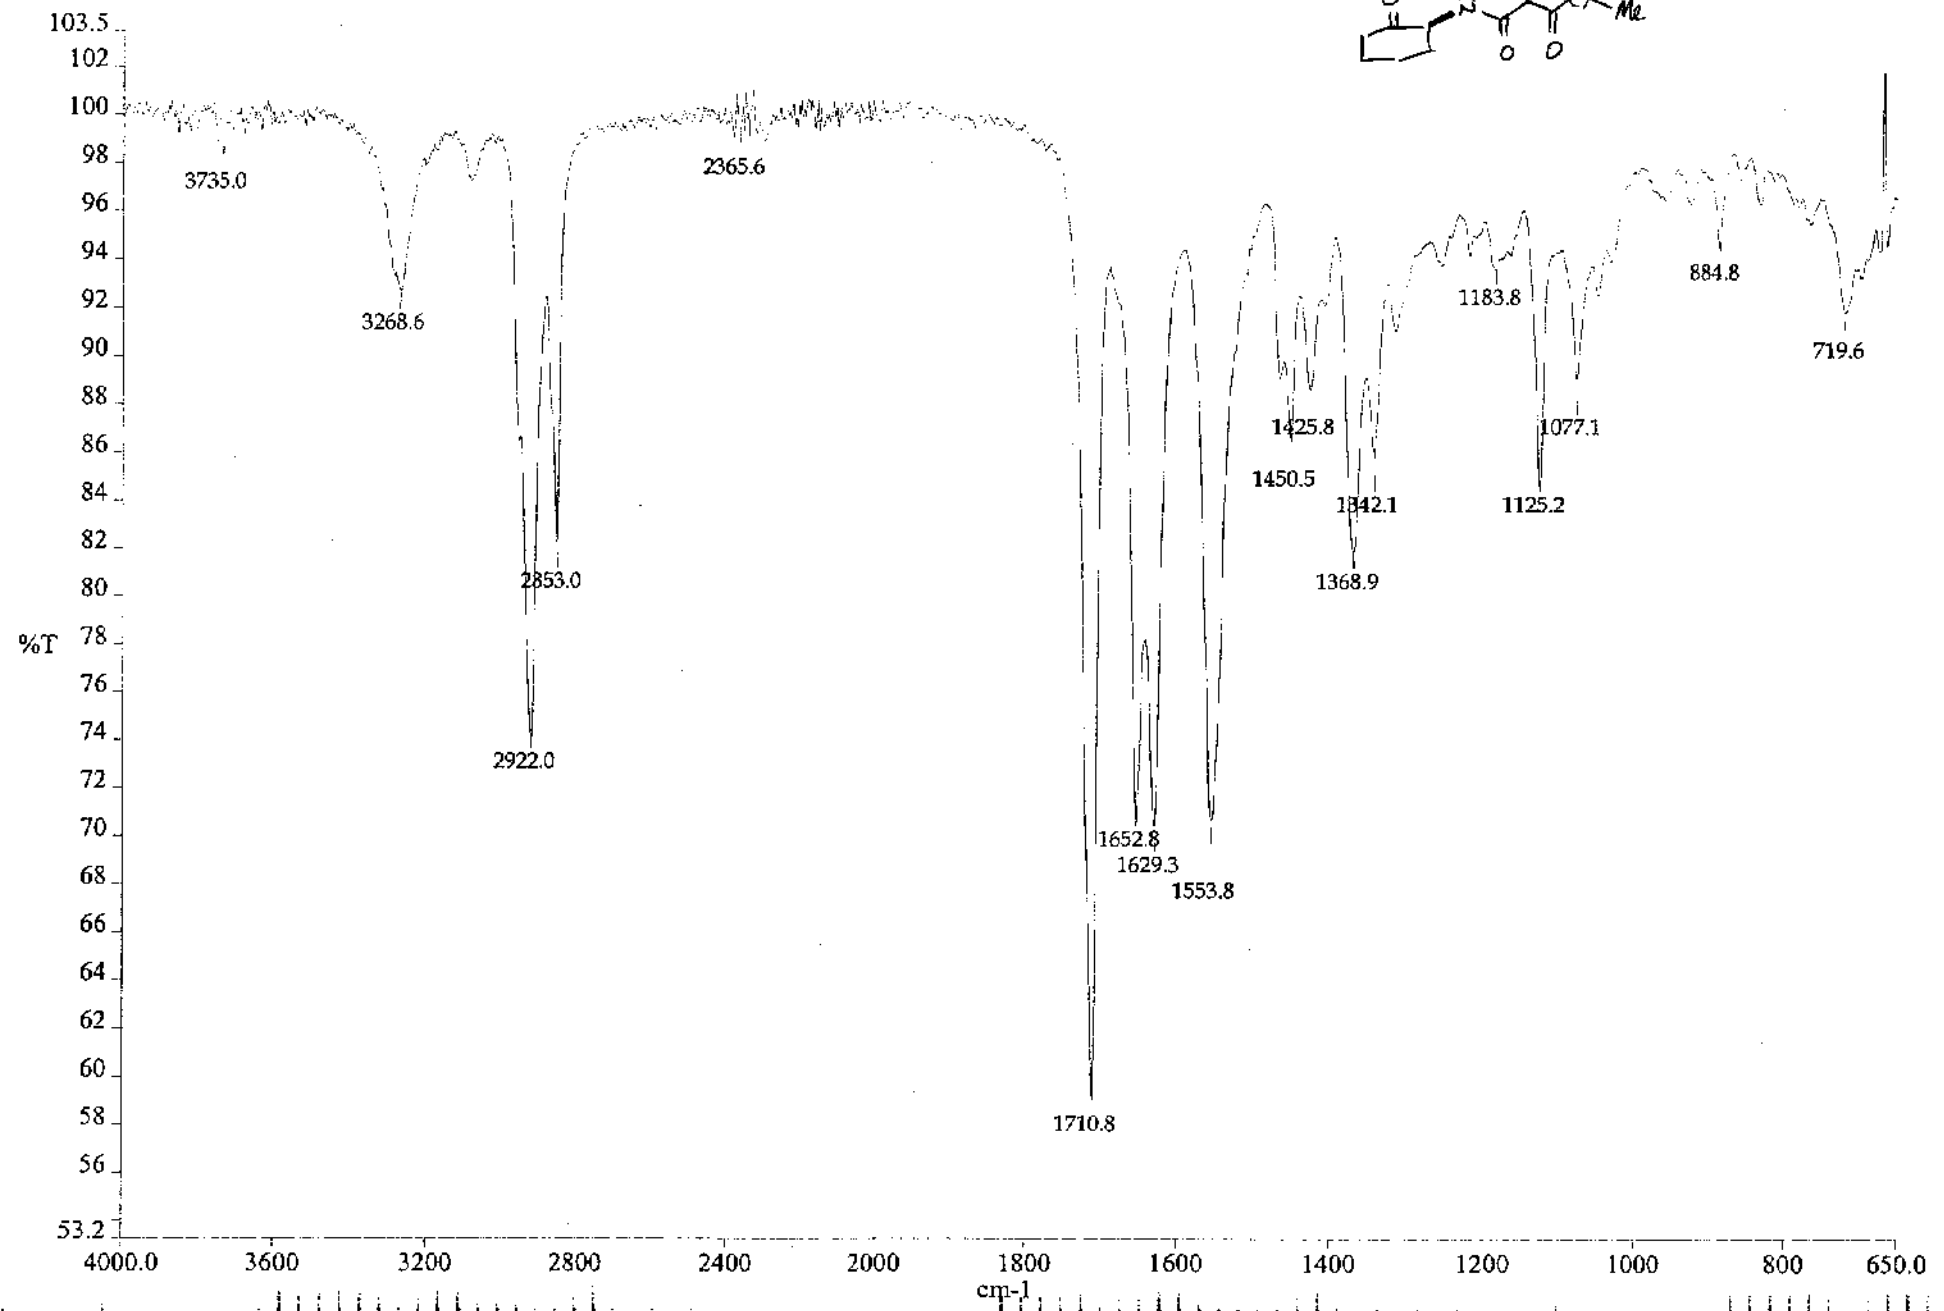

c:\pep\_data\spectra\gl-1-2435

I-33/2

V53615  
DS/FG6/I-33/2  
Freija Glansdorp  
1H  
CDCl3  
Position: 54

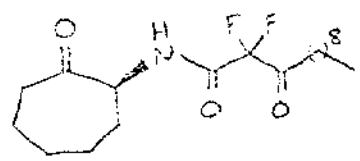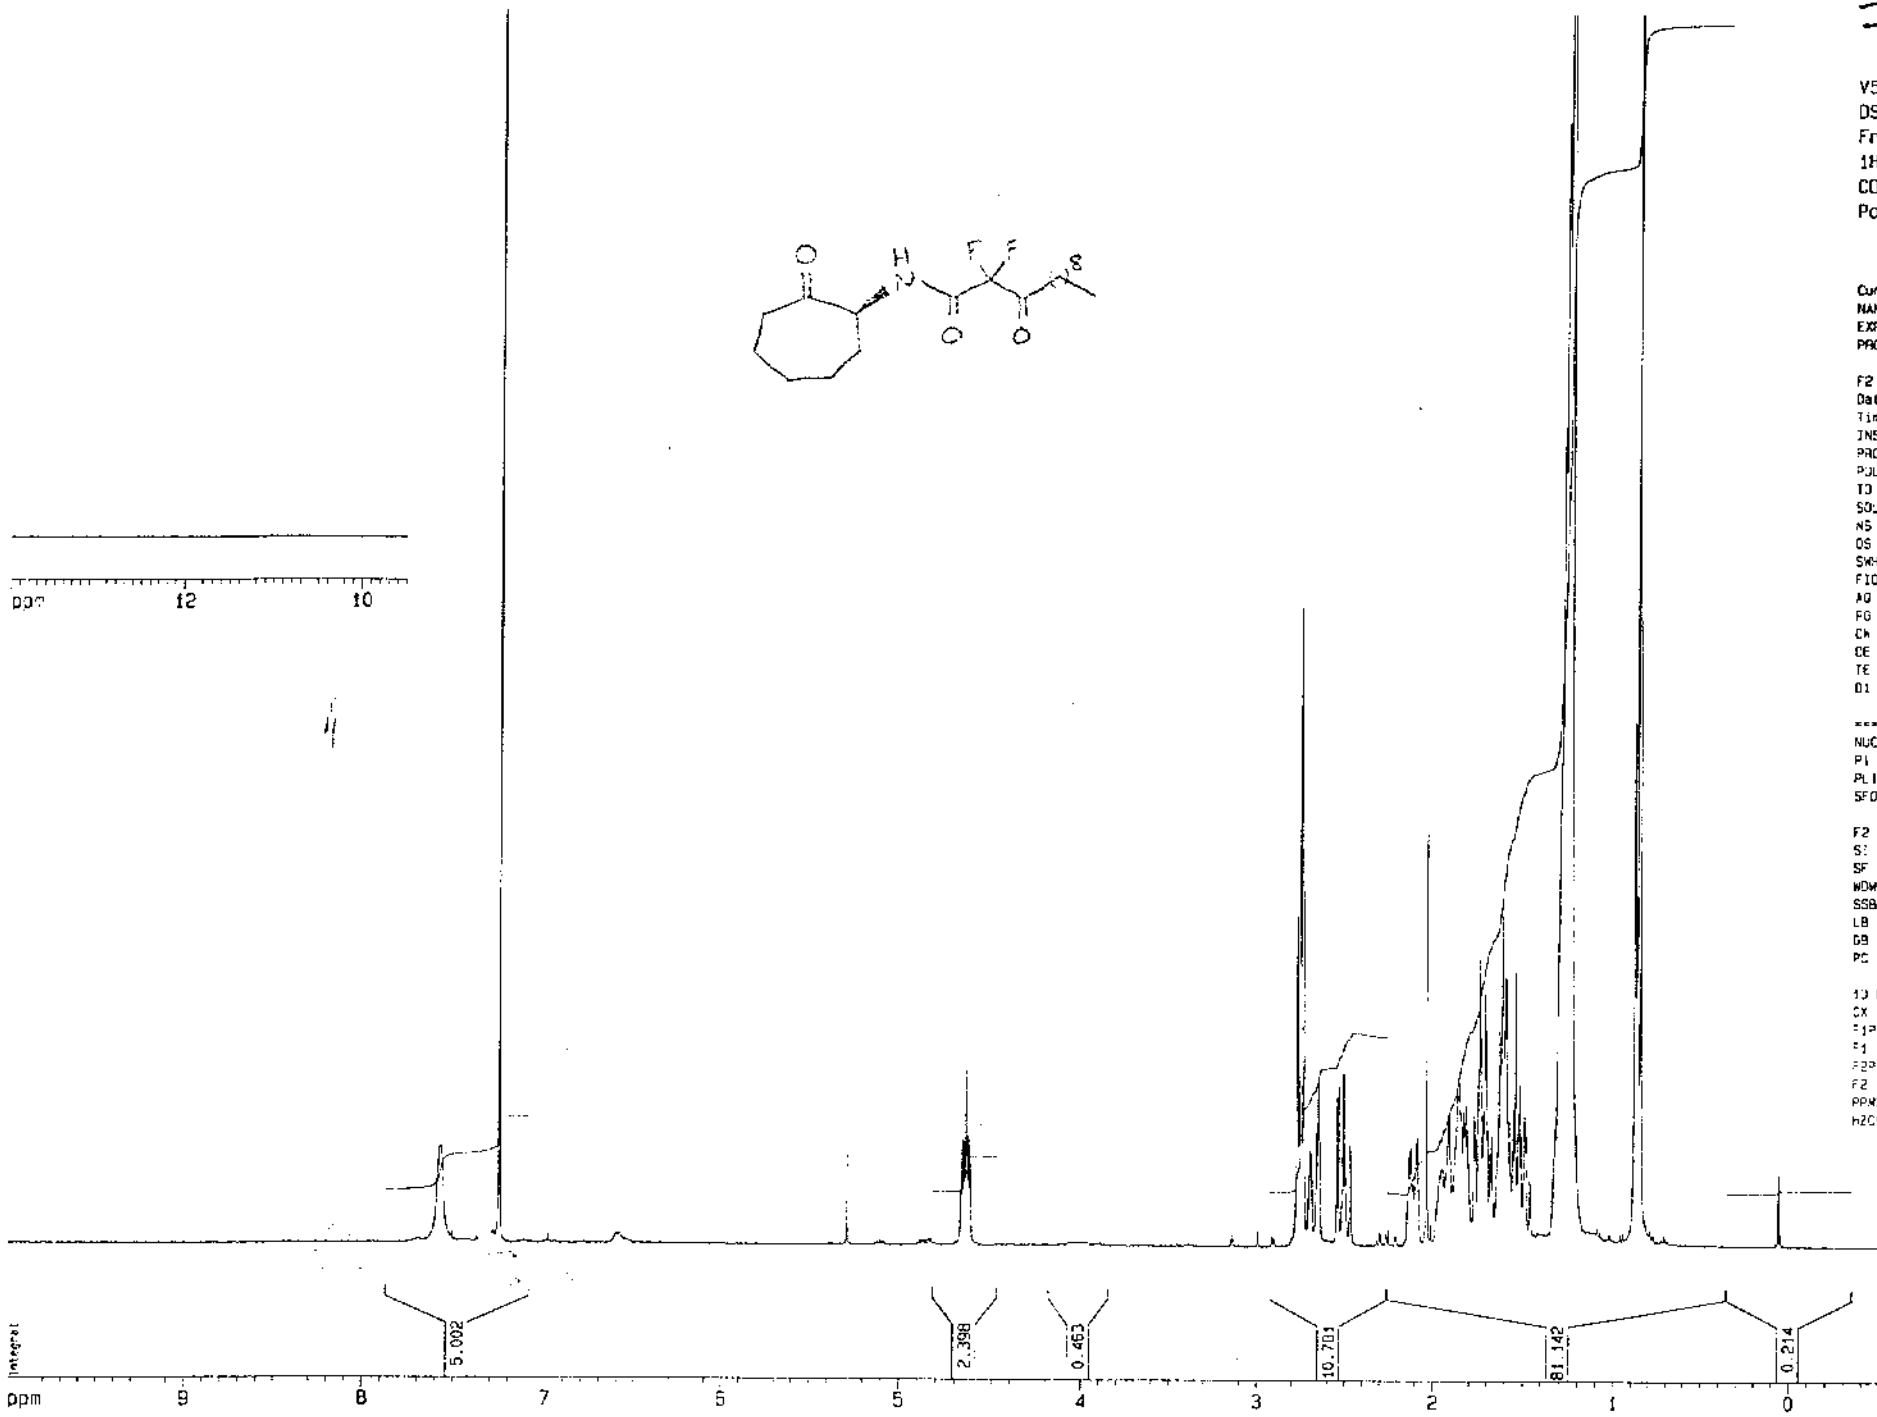

Current Data Parameters  
NAME V53615  
EXPNO 10  
PROCNO 1

F2 - Acquisition Parameters  
Date\_ 20030909  
Time 14.46  
INSTRUM dp4400  
PROBHD 5 mm QNP 1H  
PULPROG zg30  
TD 32768  
SOLVENT CDCl3  
NS 16  
DS 2  
SWH 8223.665 Hz  
FIDRES 0.250867 Hz  
AQ 1.9923444 sec  
RG 287.4  
CH 60.800 usec  
CE 5.00 usec  
TE 300.0 K  
D1 1.00000000 sec

----- CHANNEL f1 -----  
NUC1 1H  
P1 9.40 usec  
PL1 0.00 dB  
SFO1 400.1324710 MHz

F2 - Processing parameters  
SI 32768  
SF 400.1305135 MHz  
WDW EM  
SSB 0  
LB 0.30 Hz  
DB 0  
PC 1.00

1D NMR plot parameters  
CX 35.00 cm  
F1P 10.000 ppm  
F1 4001.50 Hz  
F2P -0.500 ppm  
F2 -200.07 Hz  
PP4CM 0.30000 ppm/cm  
HZCM 120.03900 Hz/cm

Standard 13C ORX-600

FGG\_1\_19C

200333\_2

100.58

101.02

I-33/2

ppm

200.19  
199.4

77.19  
76.98  
76.76

50.99  
58.43

41.27  
37.44  
32.03  
31.00  
29.30  
29.21  
29.17  
28.83  
28.76  
27.50  
22.92  
22.03  
22.38  
18.40  
14.04

ppm

200

180

160

140

120

100

80

60

40

20

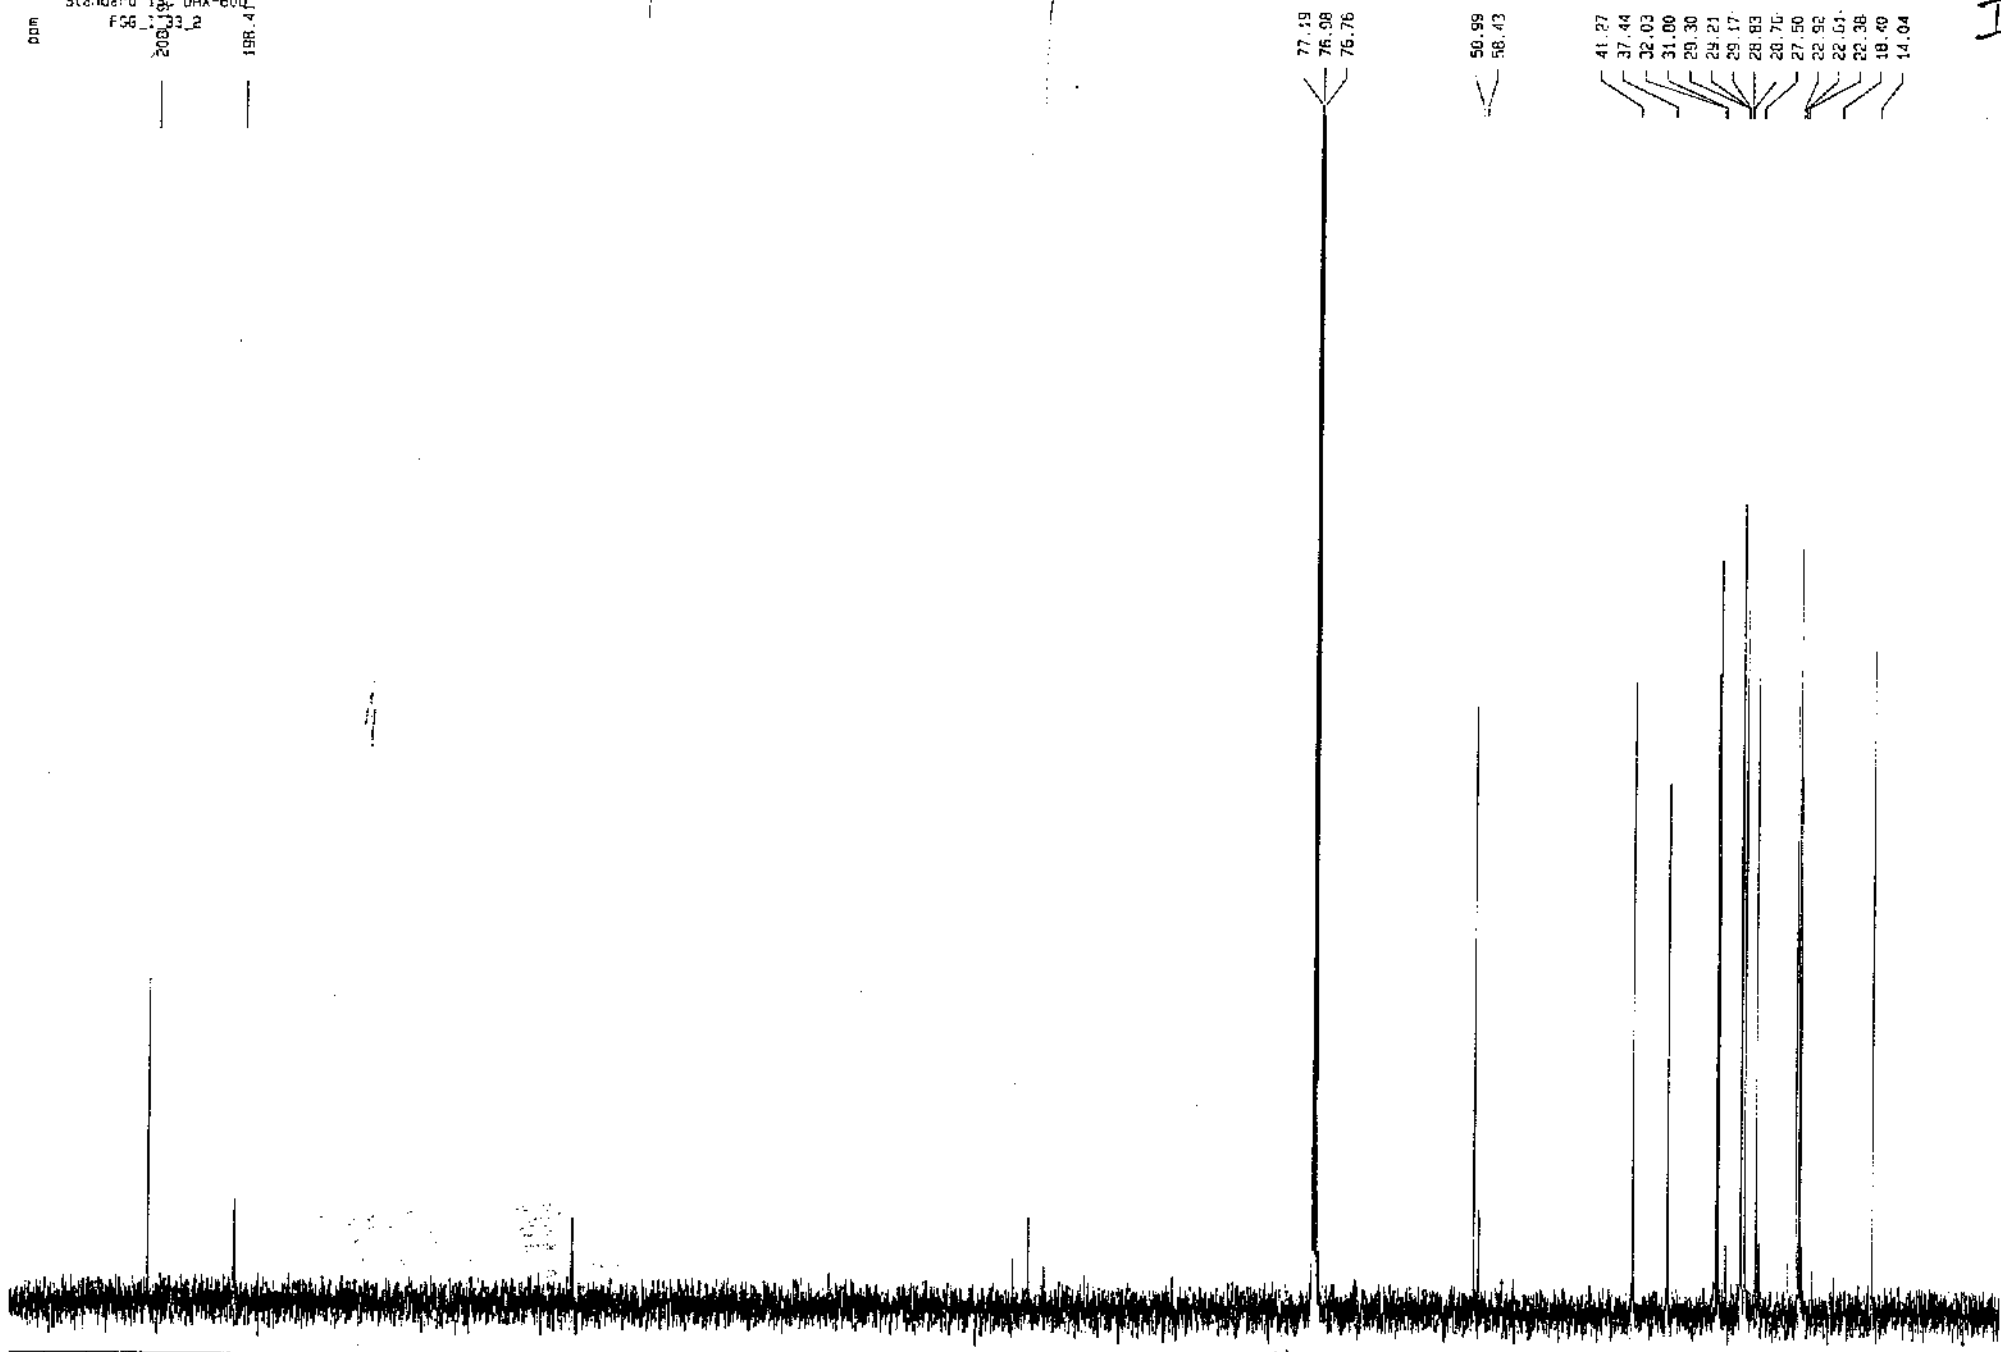

FGG-I-33/2

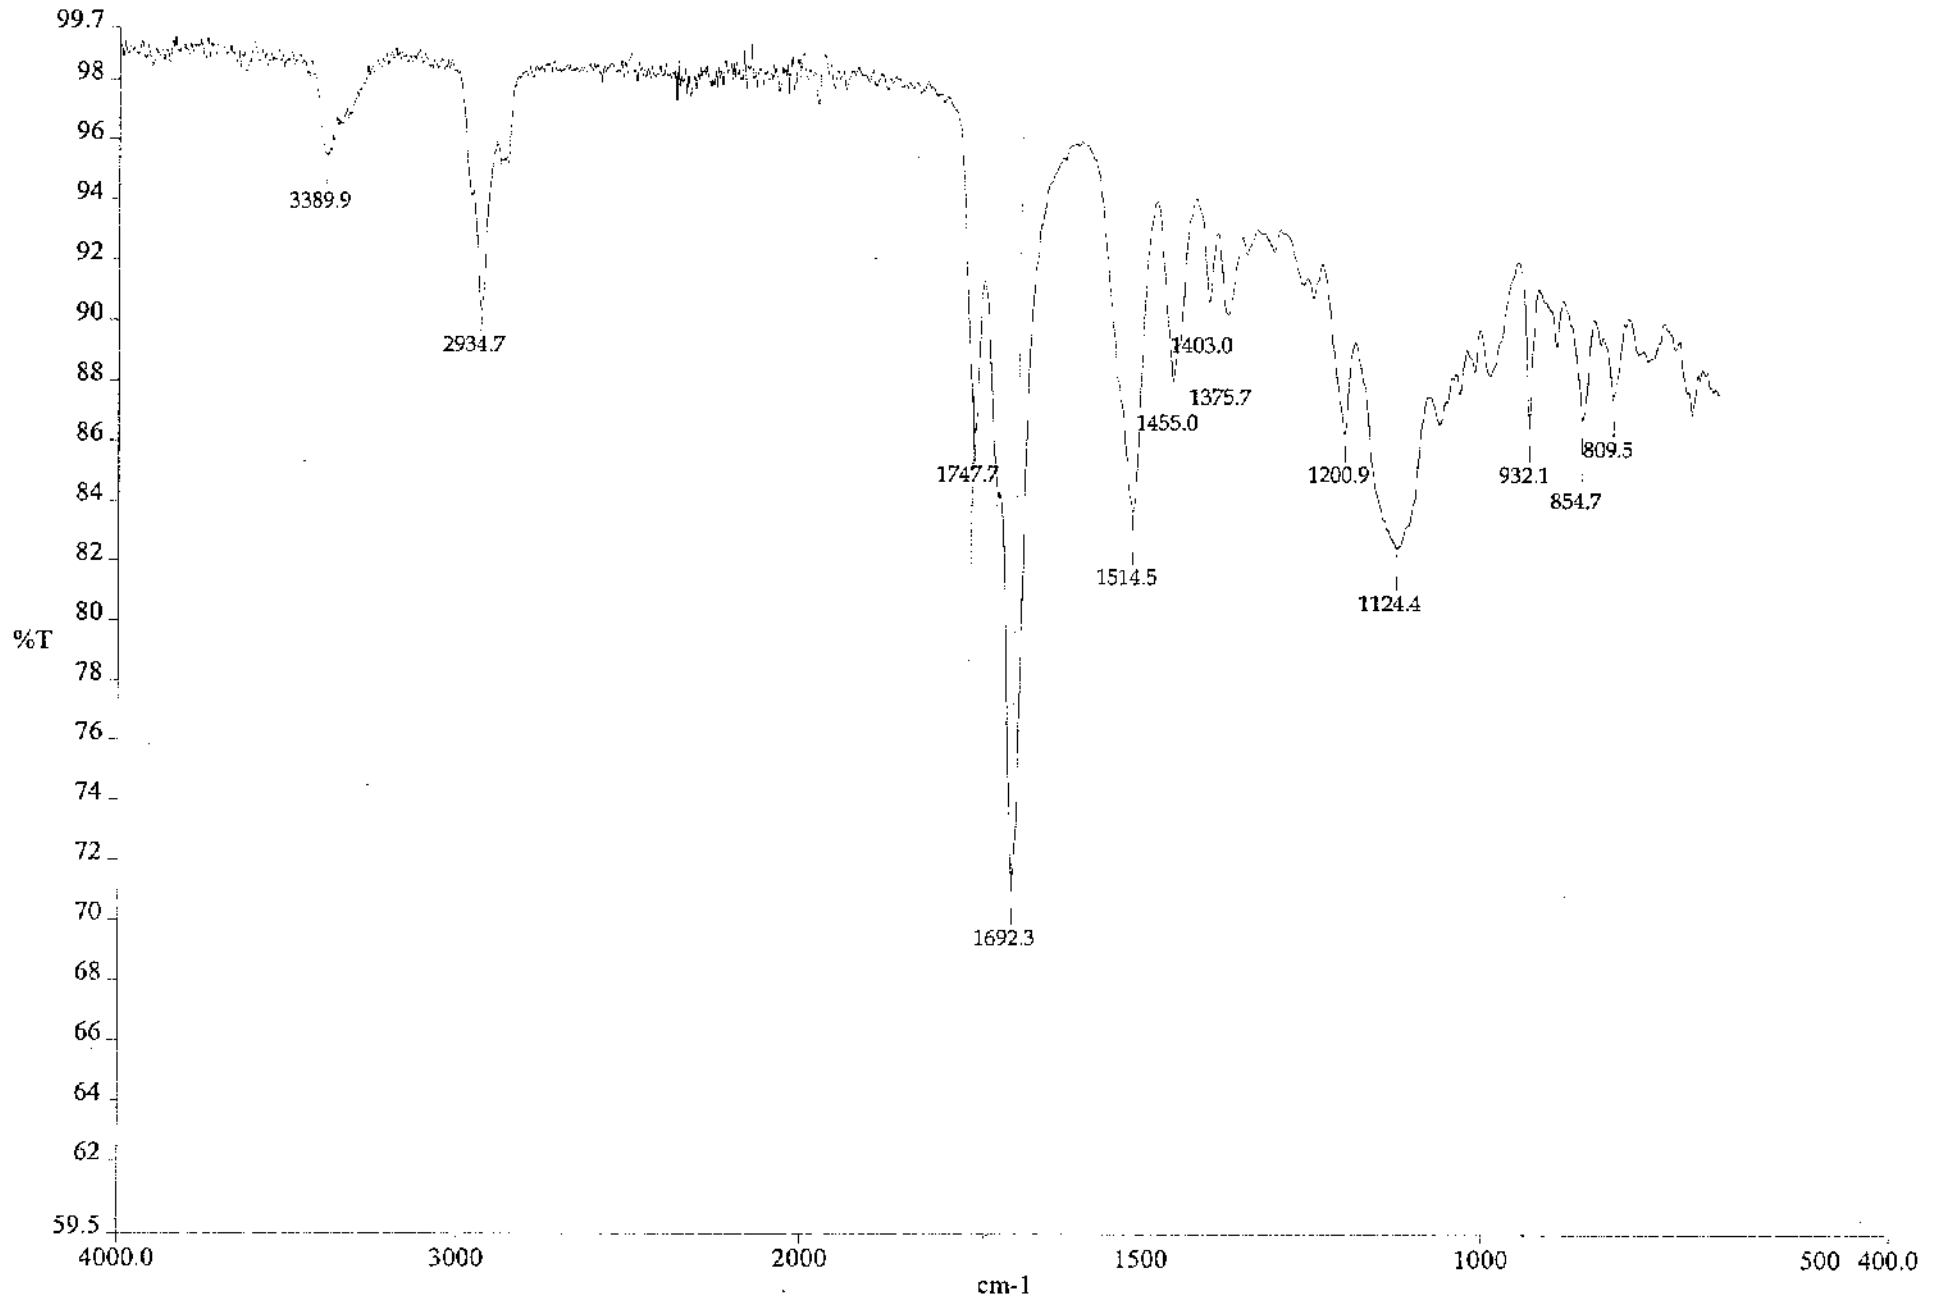

I-127/2

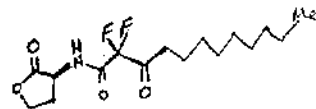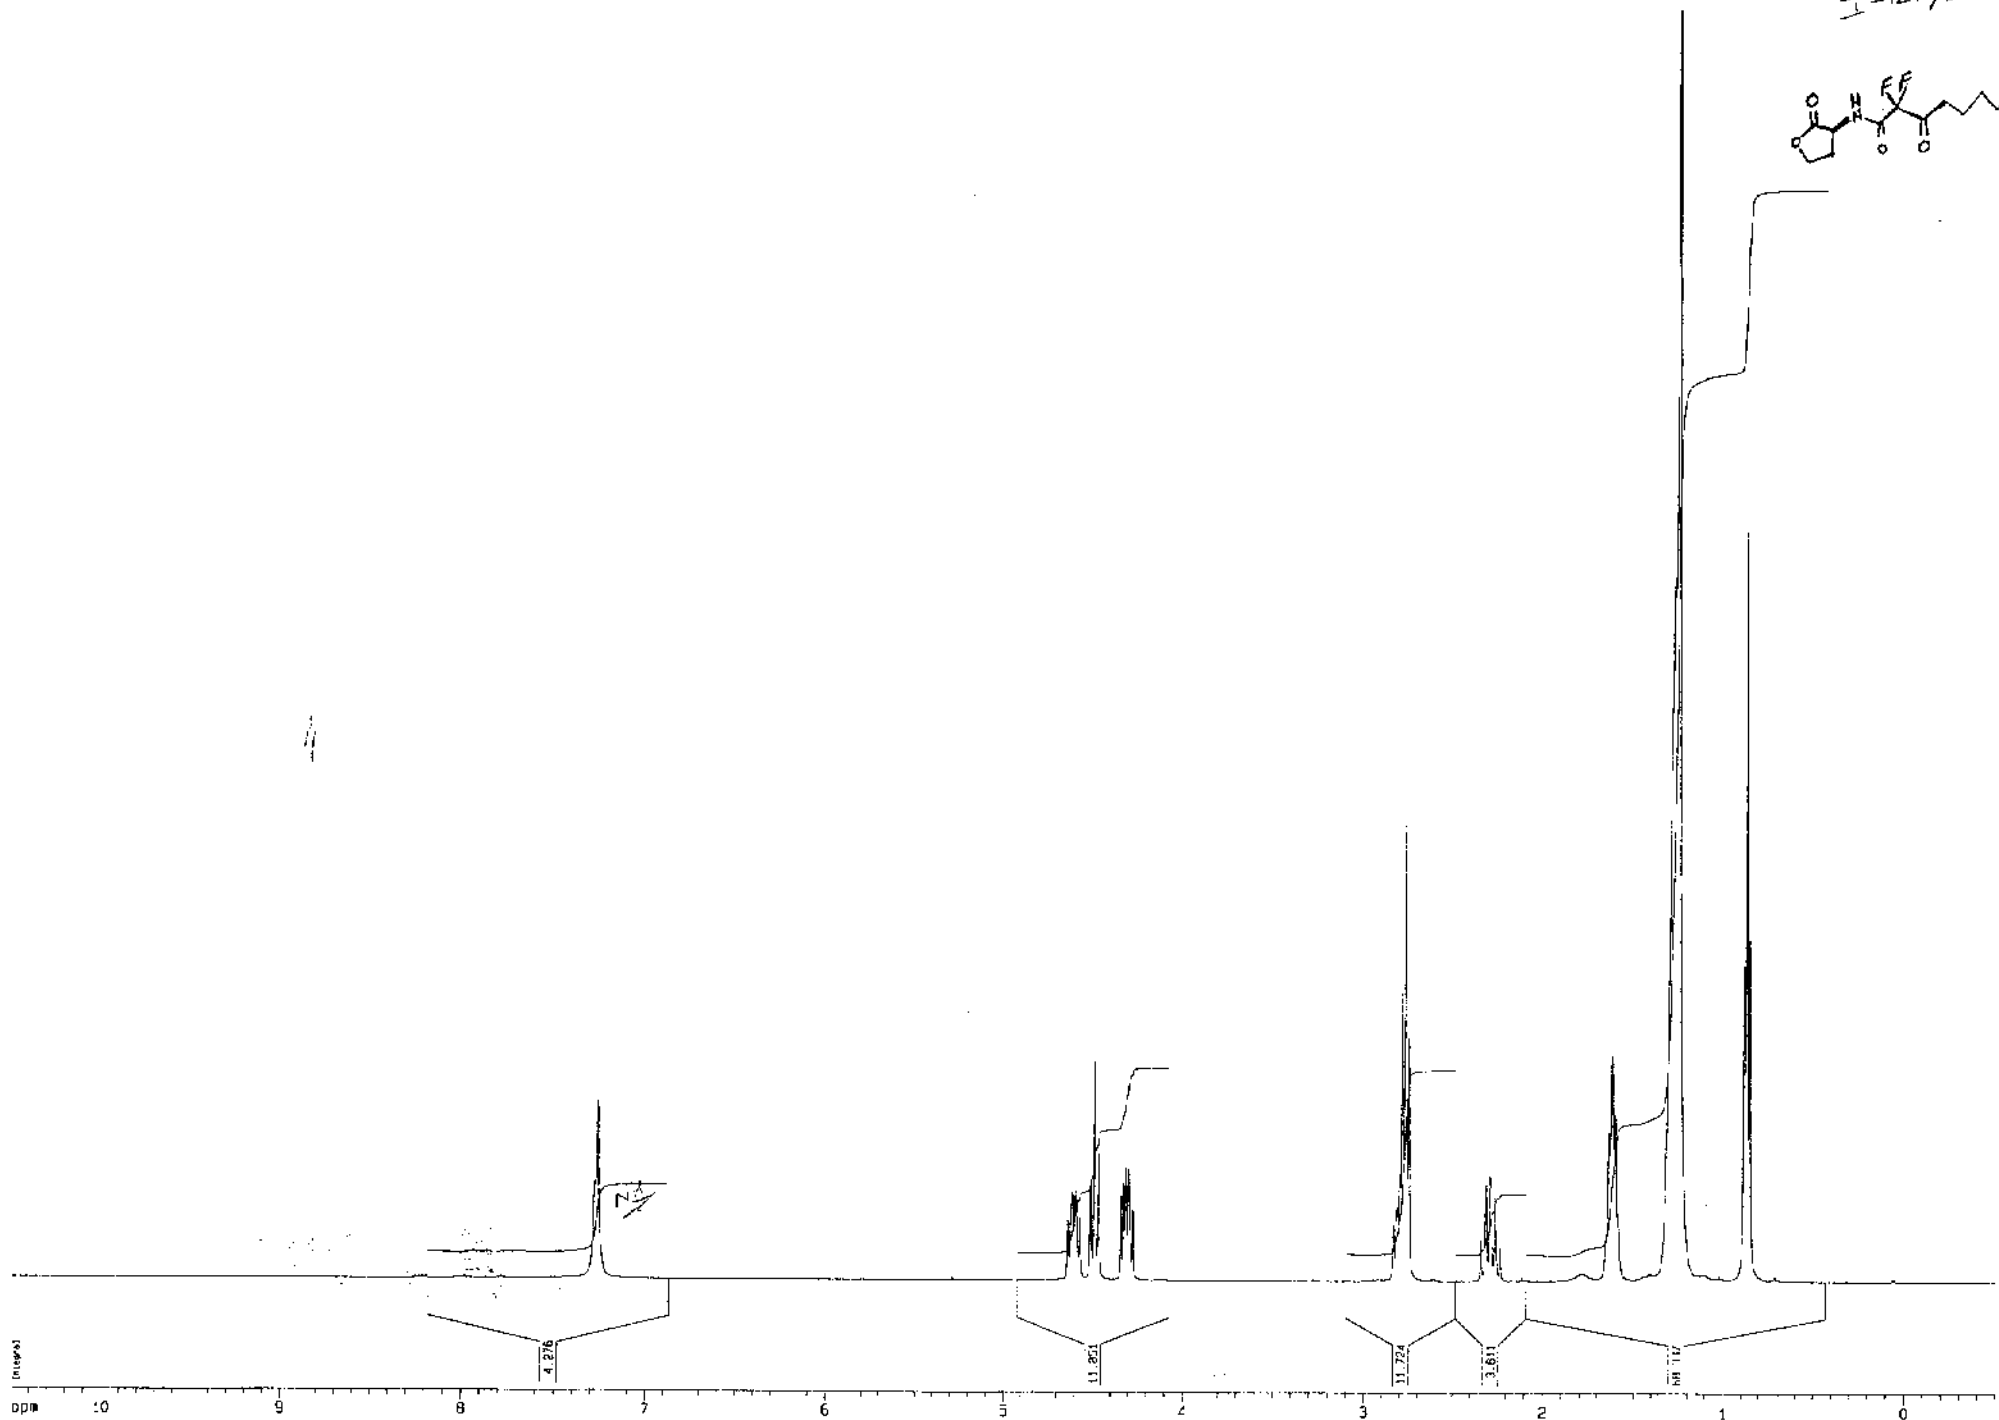

ppm

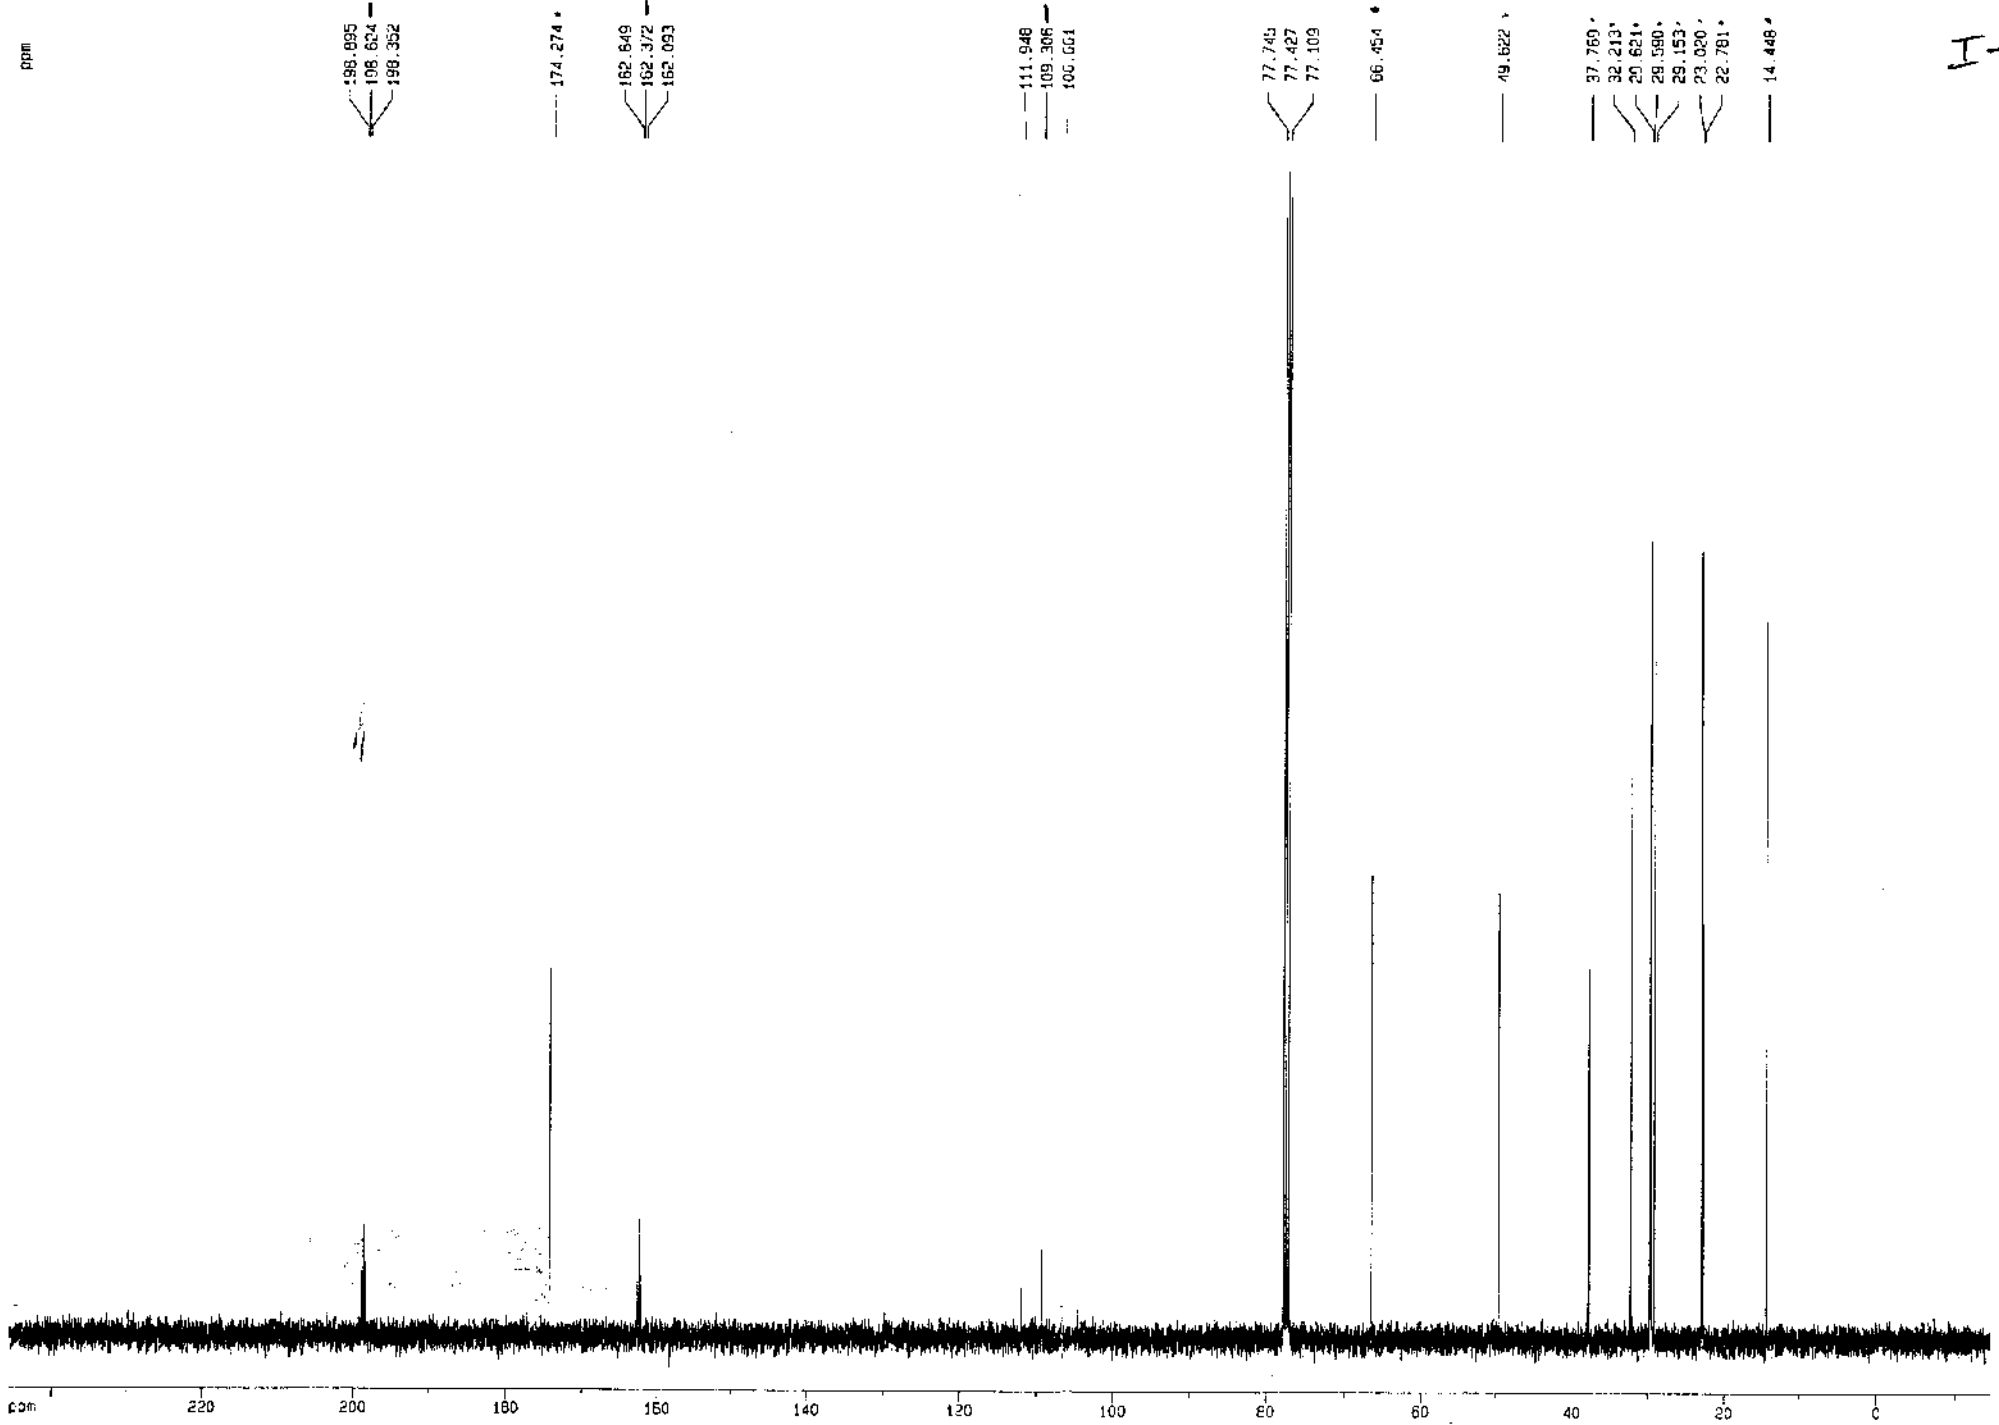

I-127/2

I-127/2

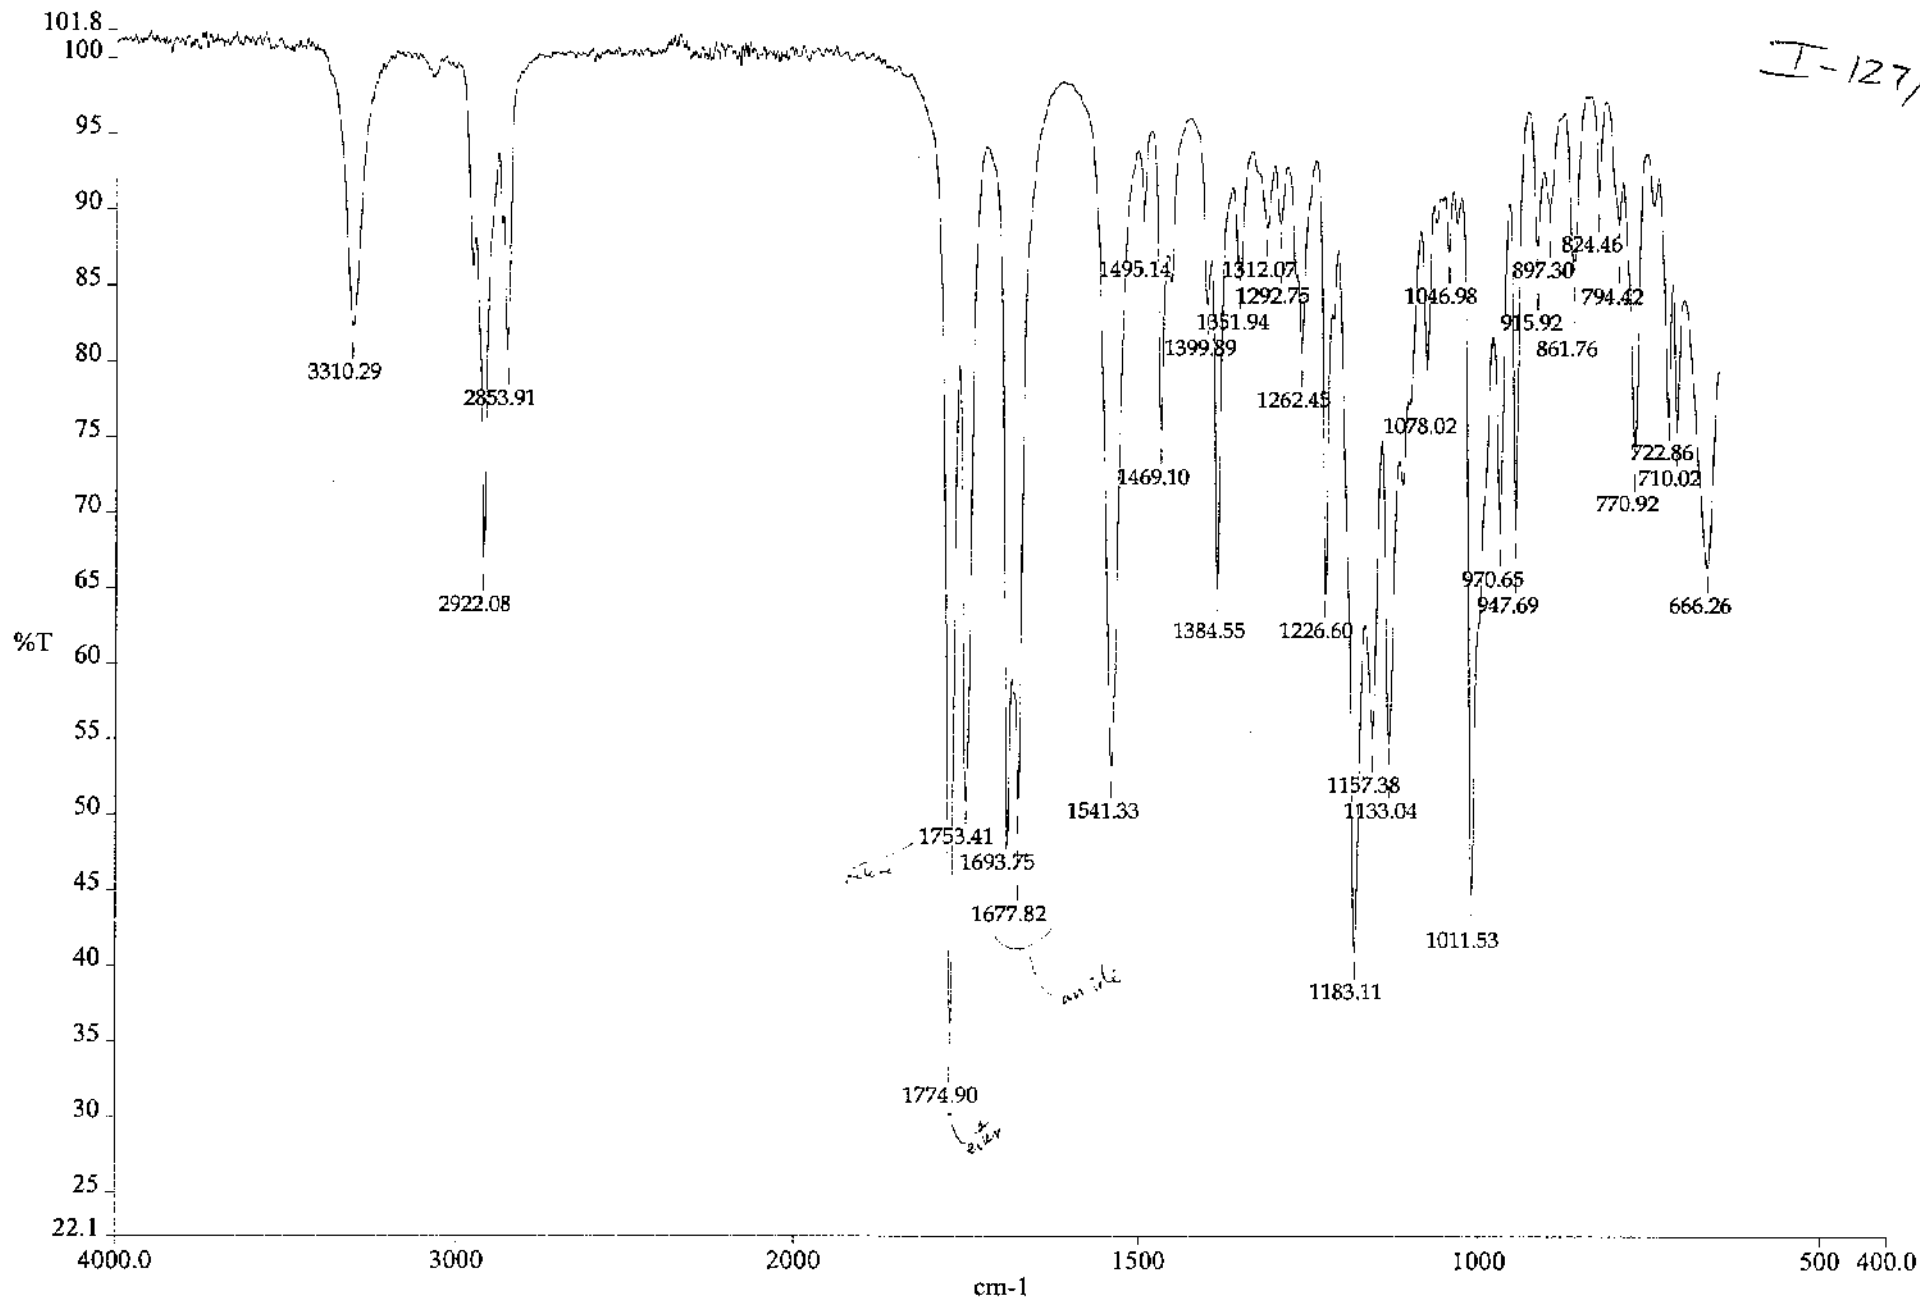

I-103/2

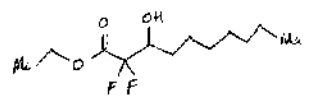

+ EtOAc

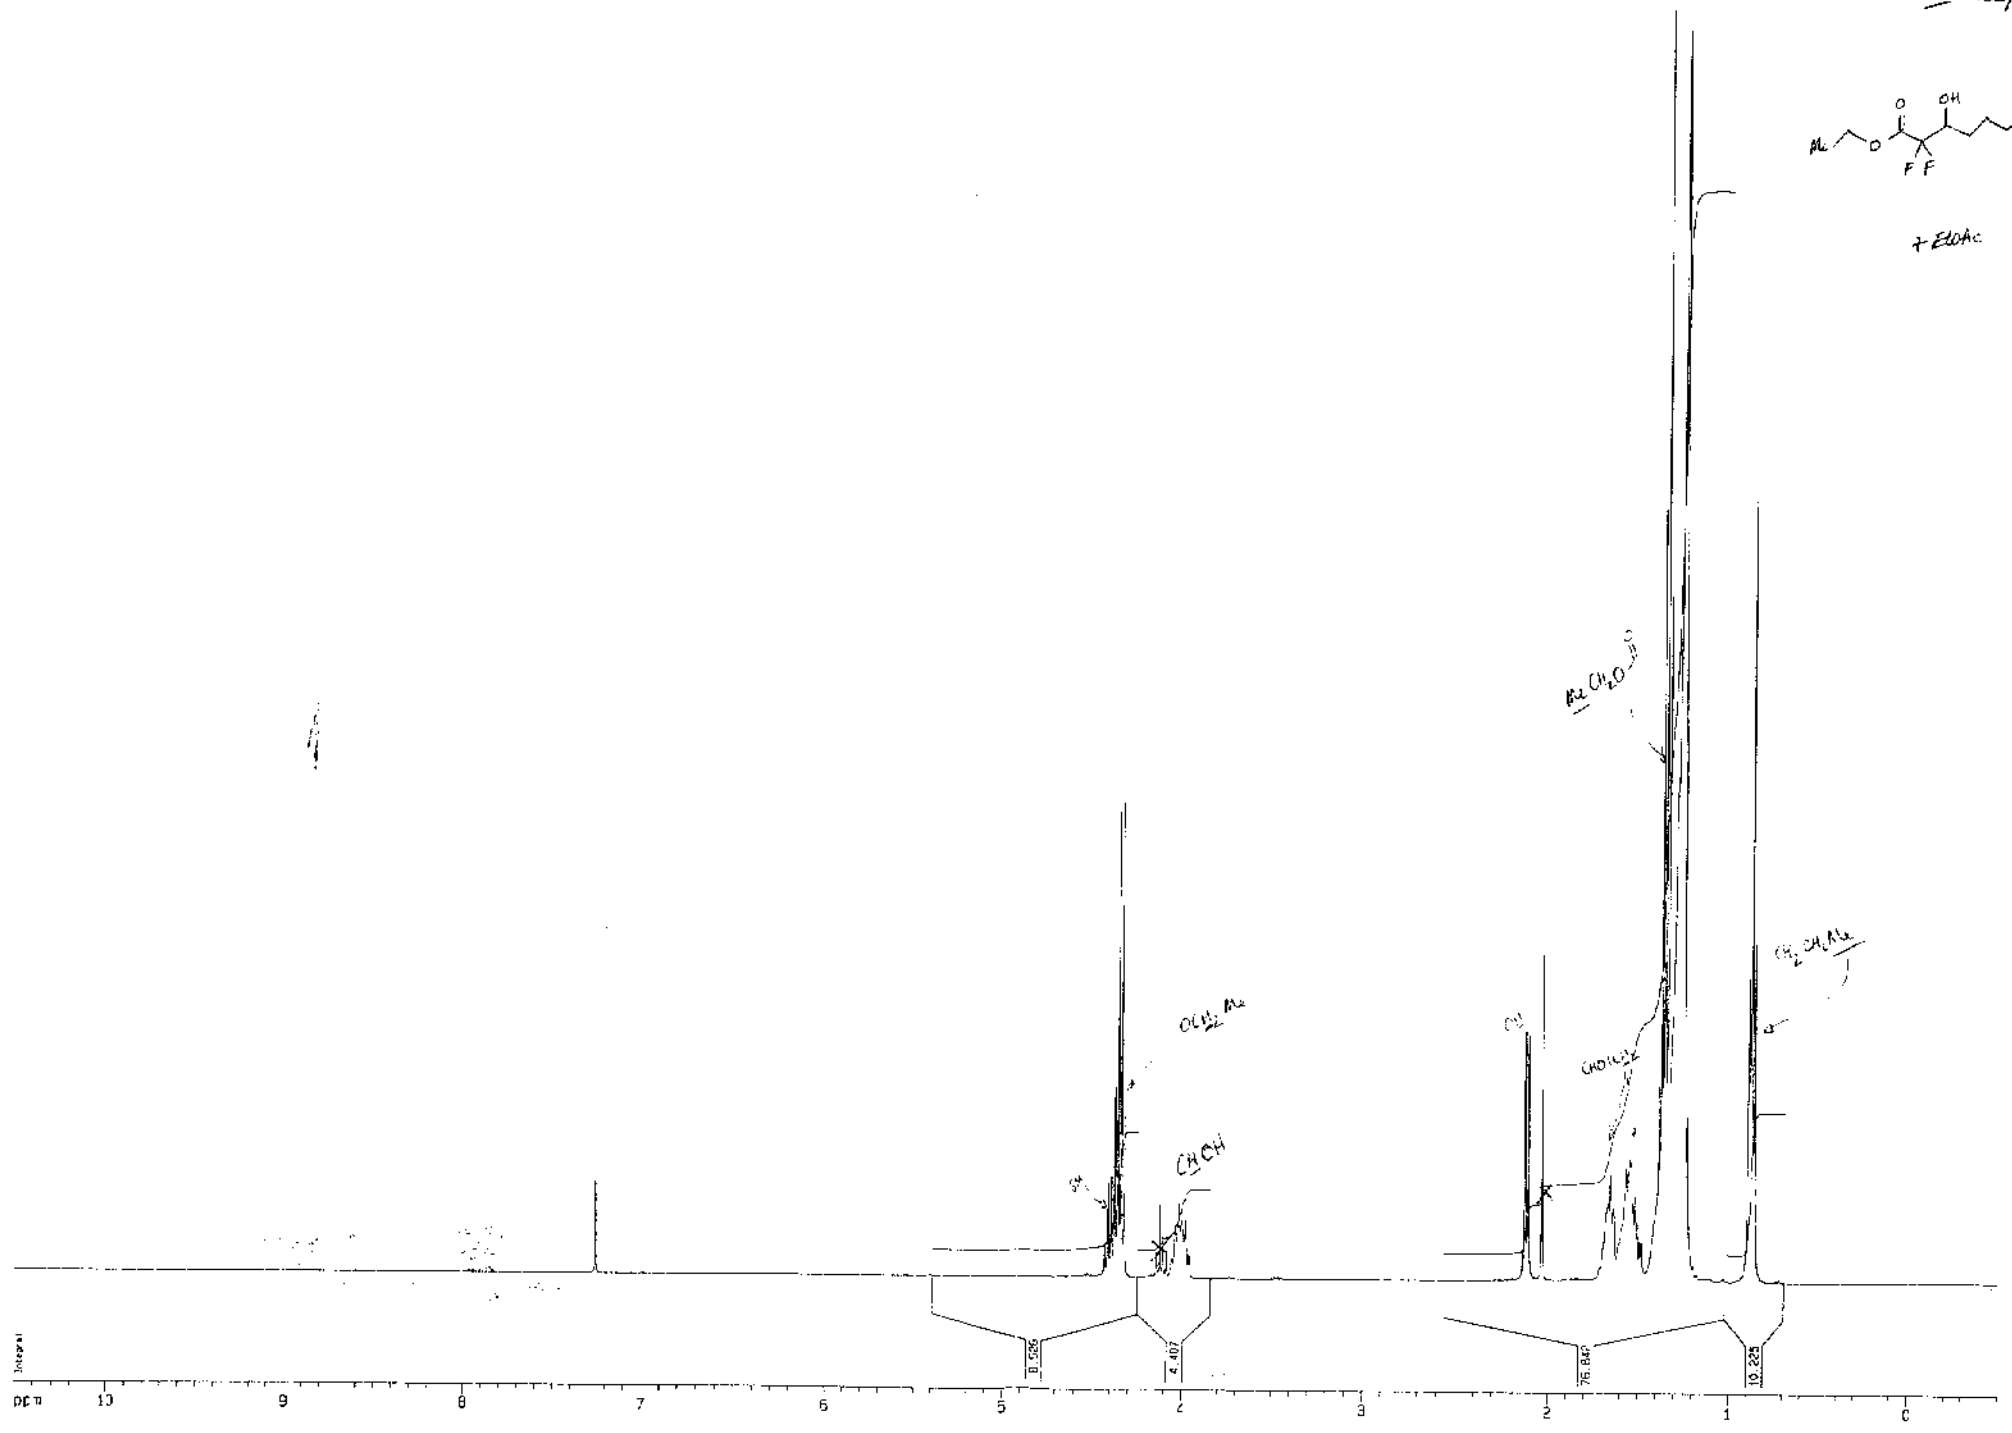

171.621  
 164.424  
 164.114  
 103.789

117.003  
 115.075  
 113.901  
 112.525

77.718  
 77.400  
 77.062  
 72.199  
 72.170  
 71.928  
 64.575  
 63.372  
 60-80

32.247  
 29.804  
 29.674  
 29.650  
 25.987  
 23.036  
 21.377  
 14.440  
 14.304  
 14.117

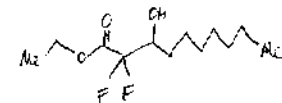

+ EtOAc + Sm (etc)

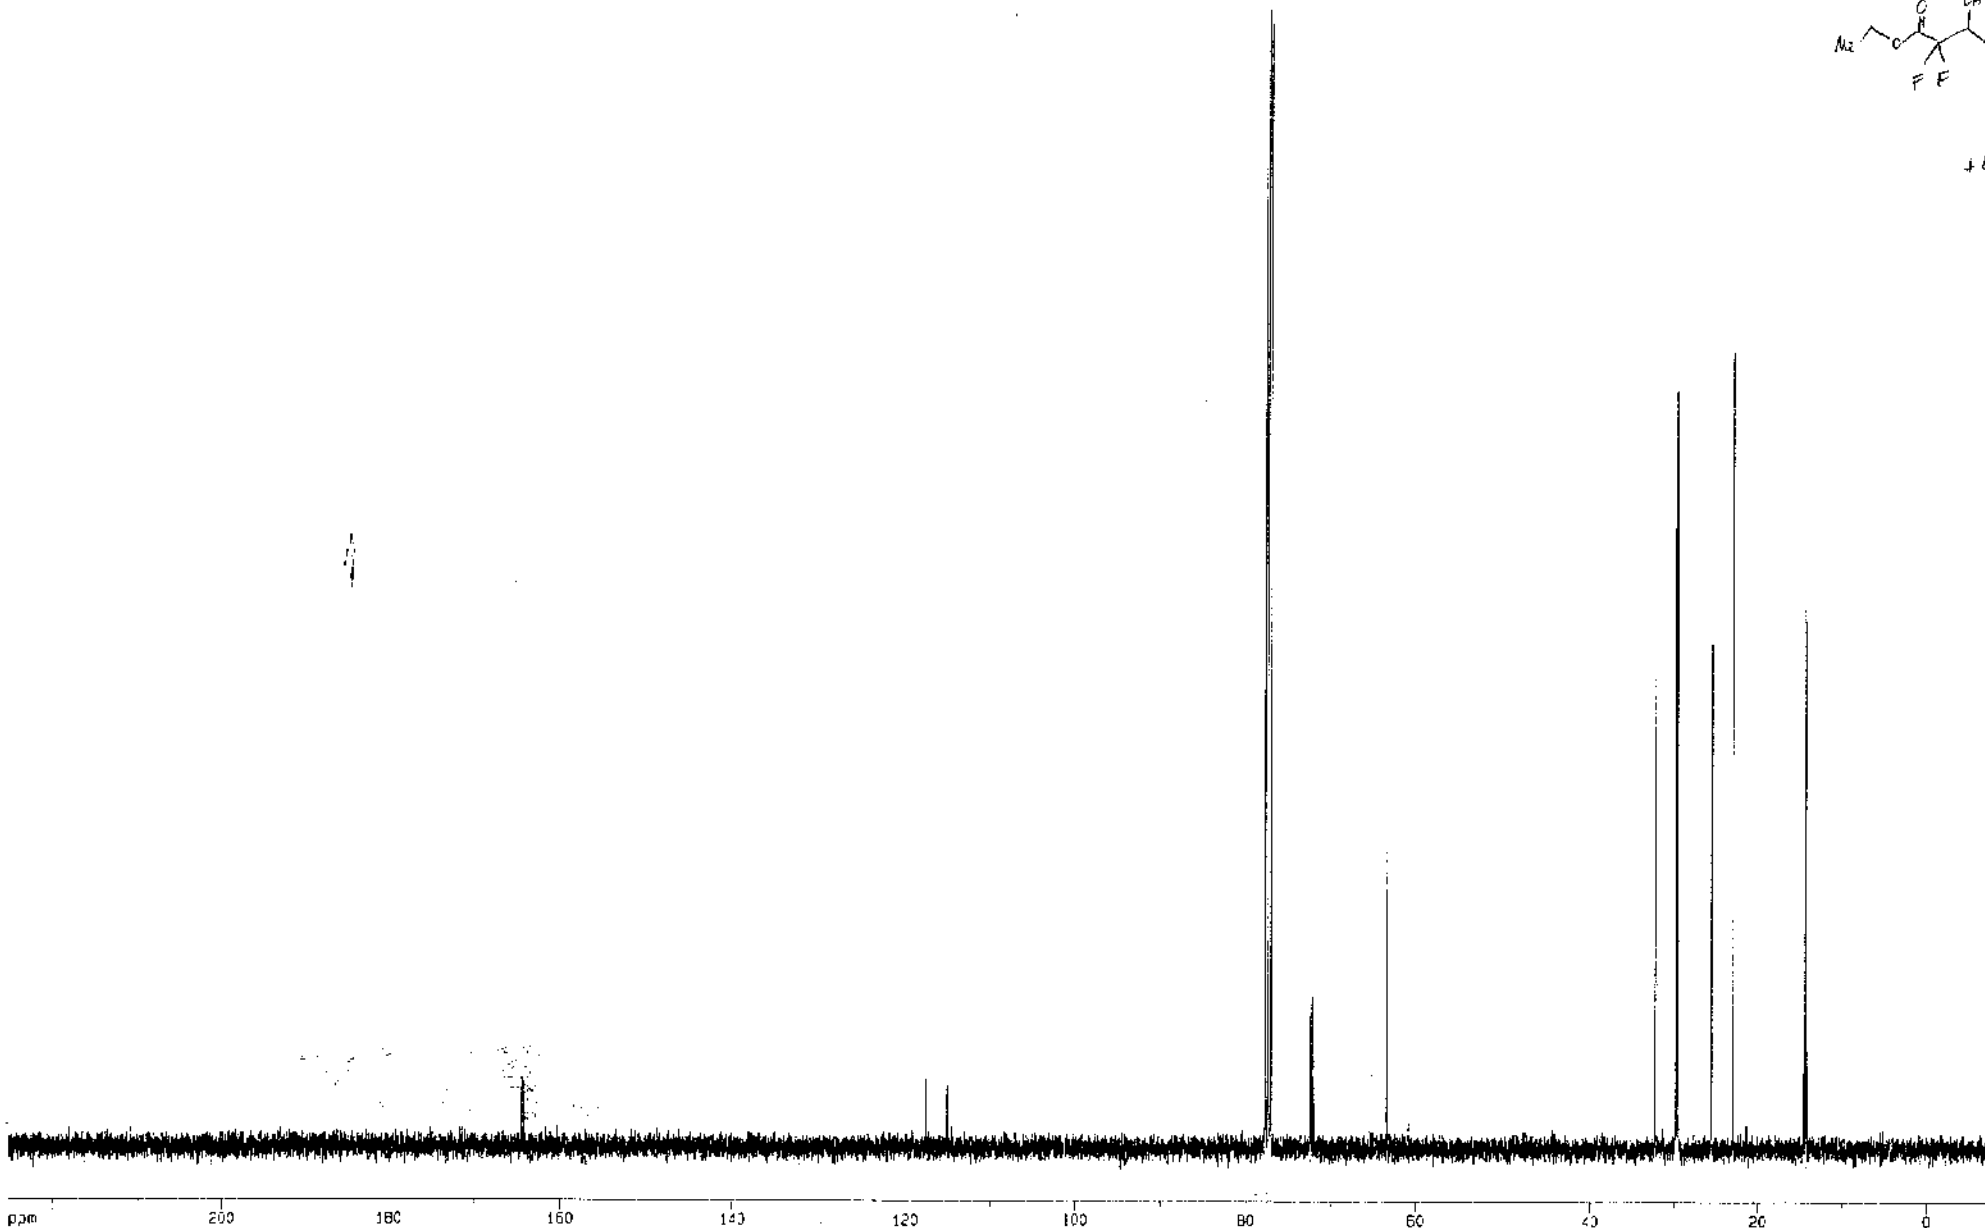

I-103/2

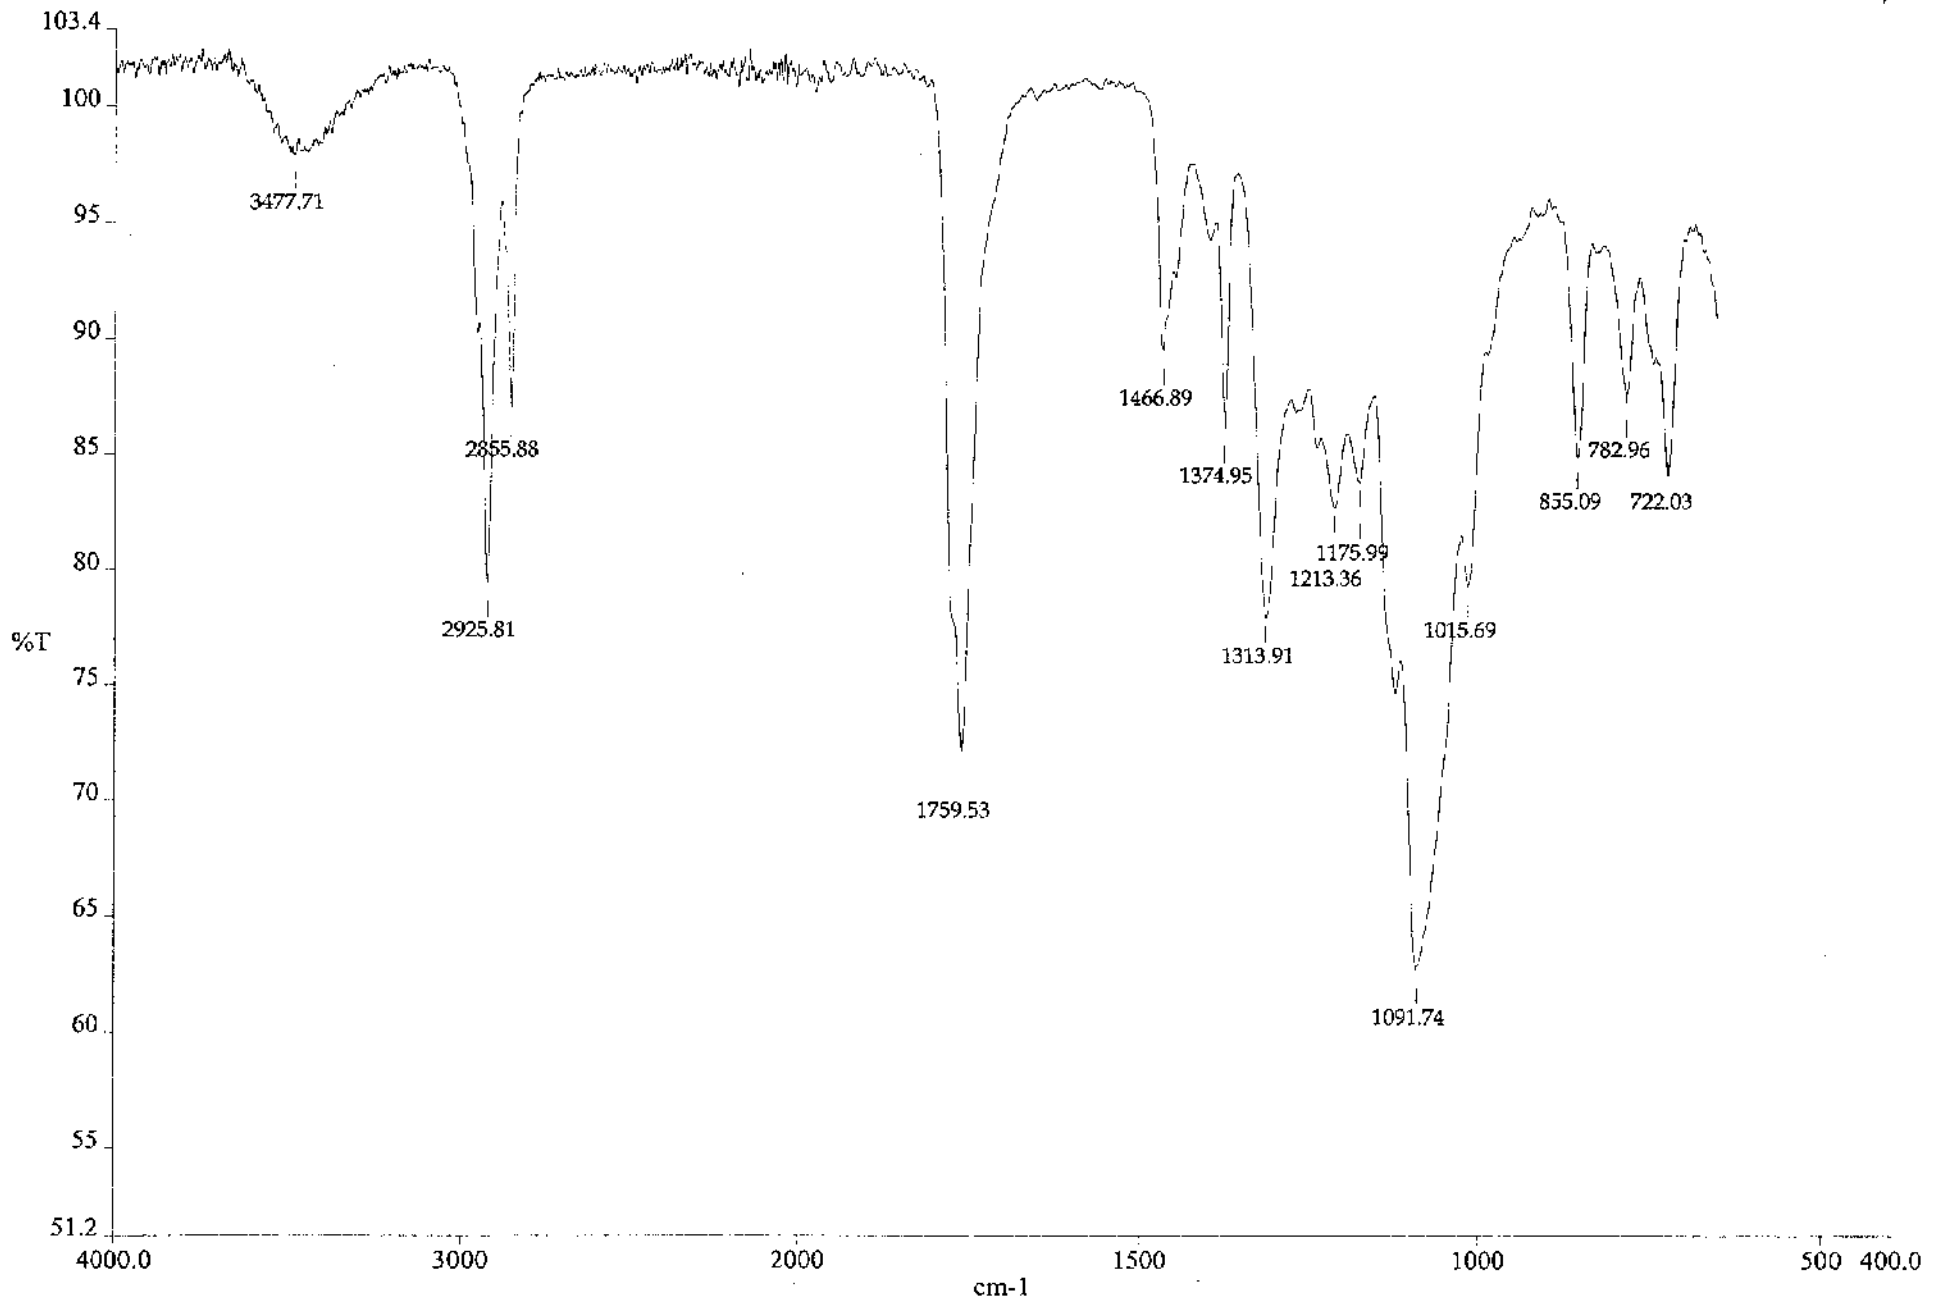

c:\pel\_data\spectra\drs.sp

I-104/1

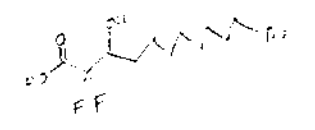

+ acetone/dioxane

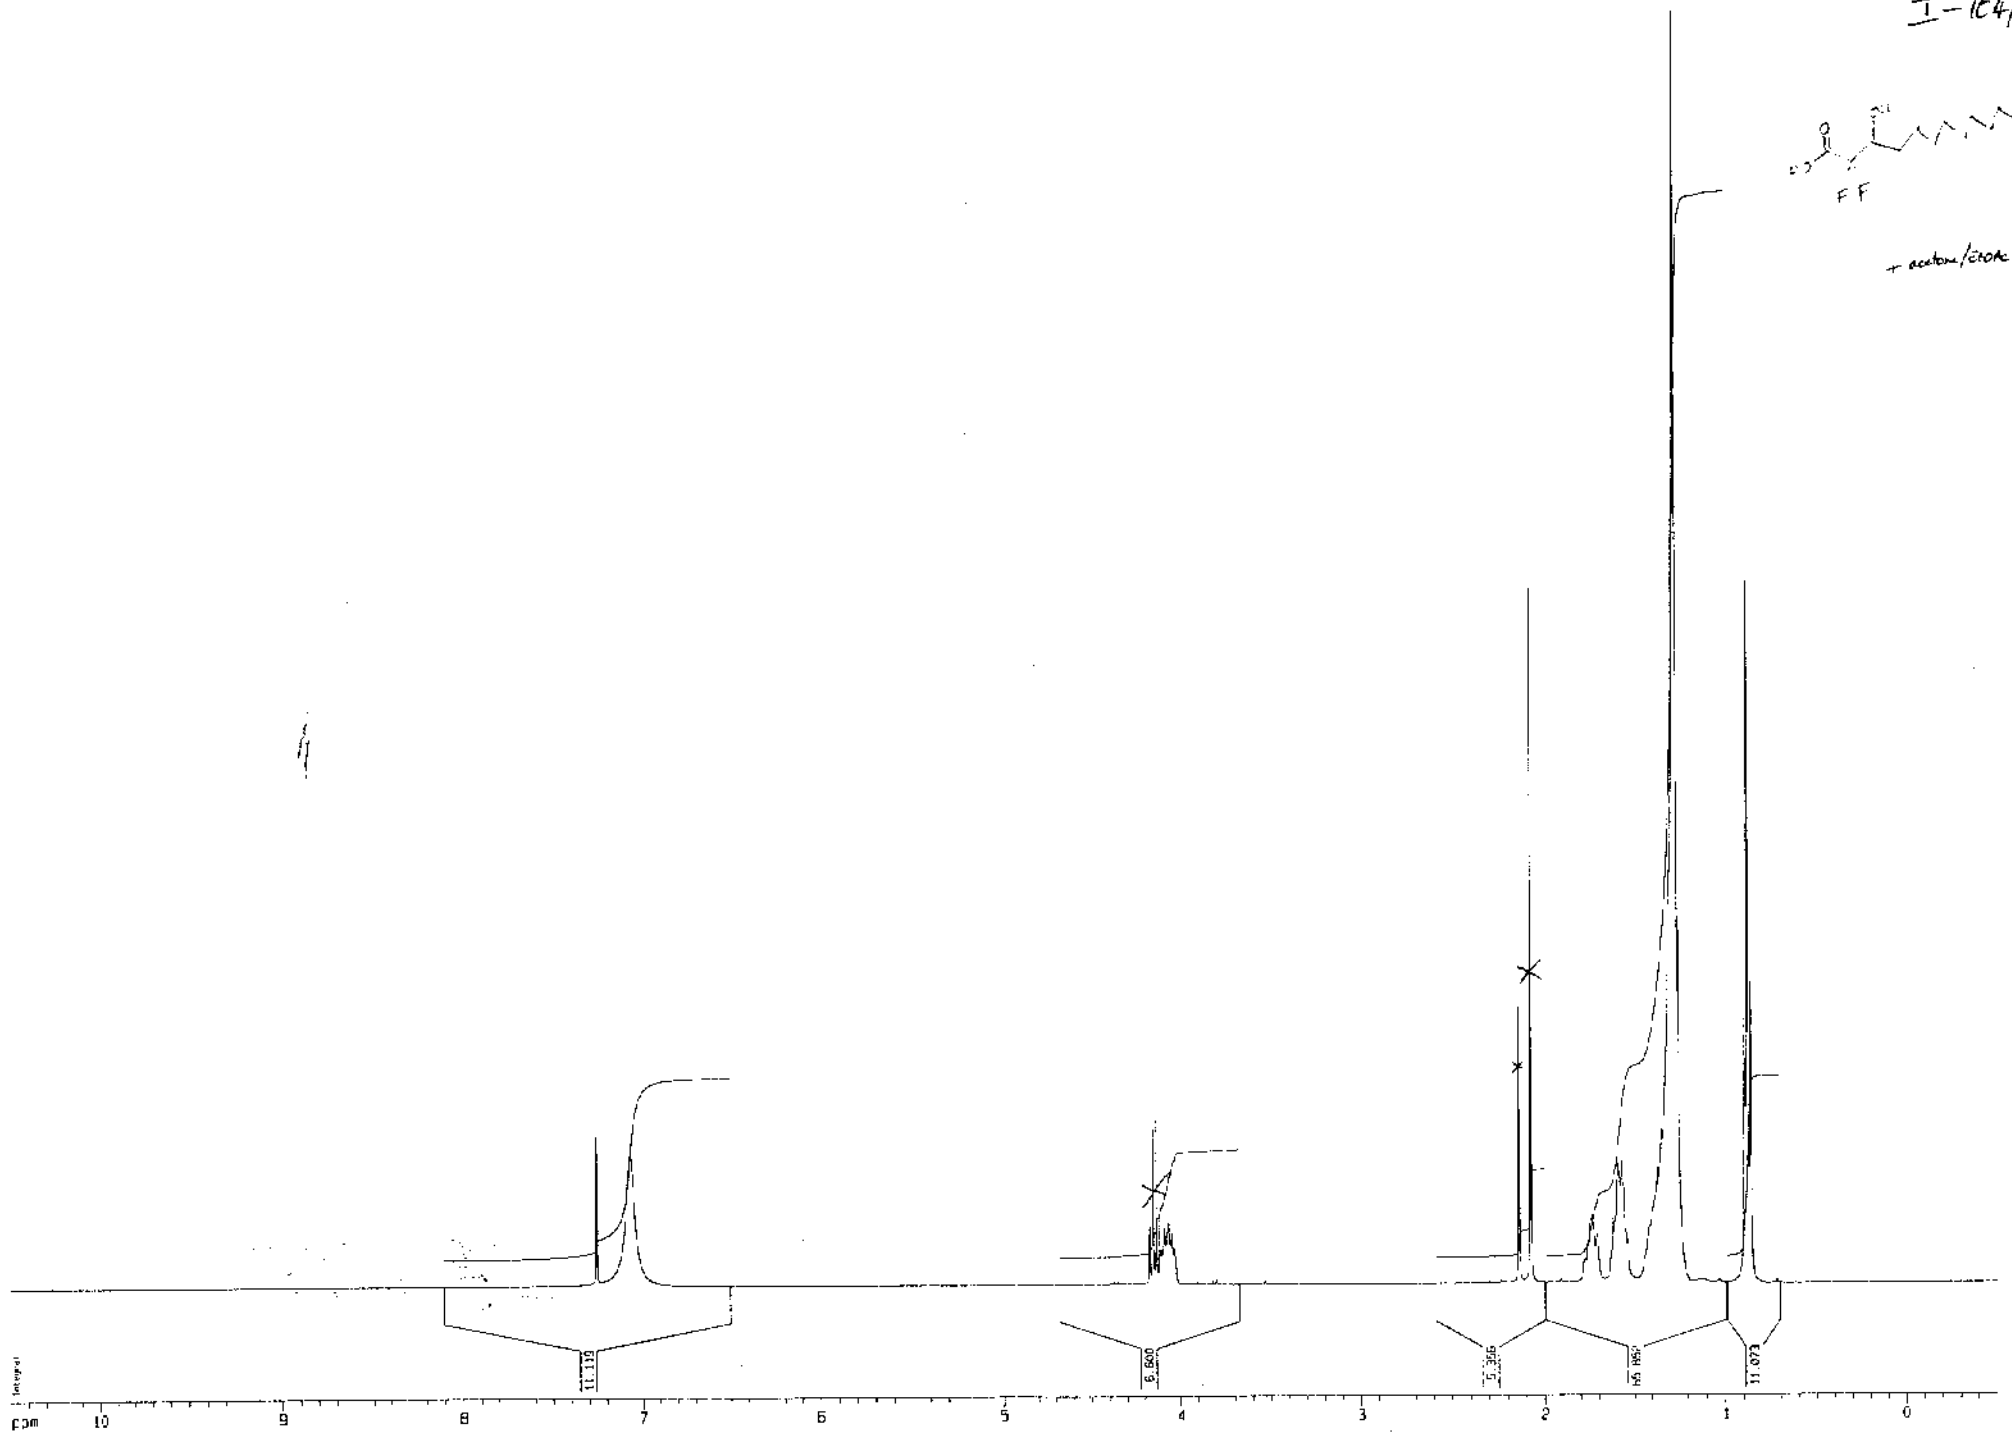

ppm

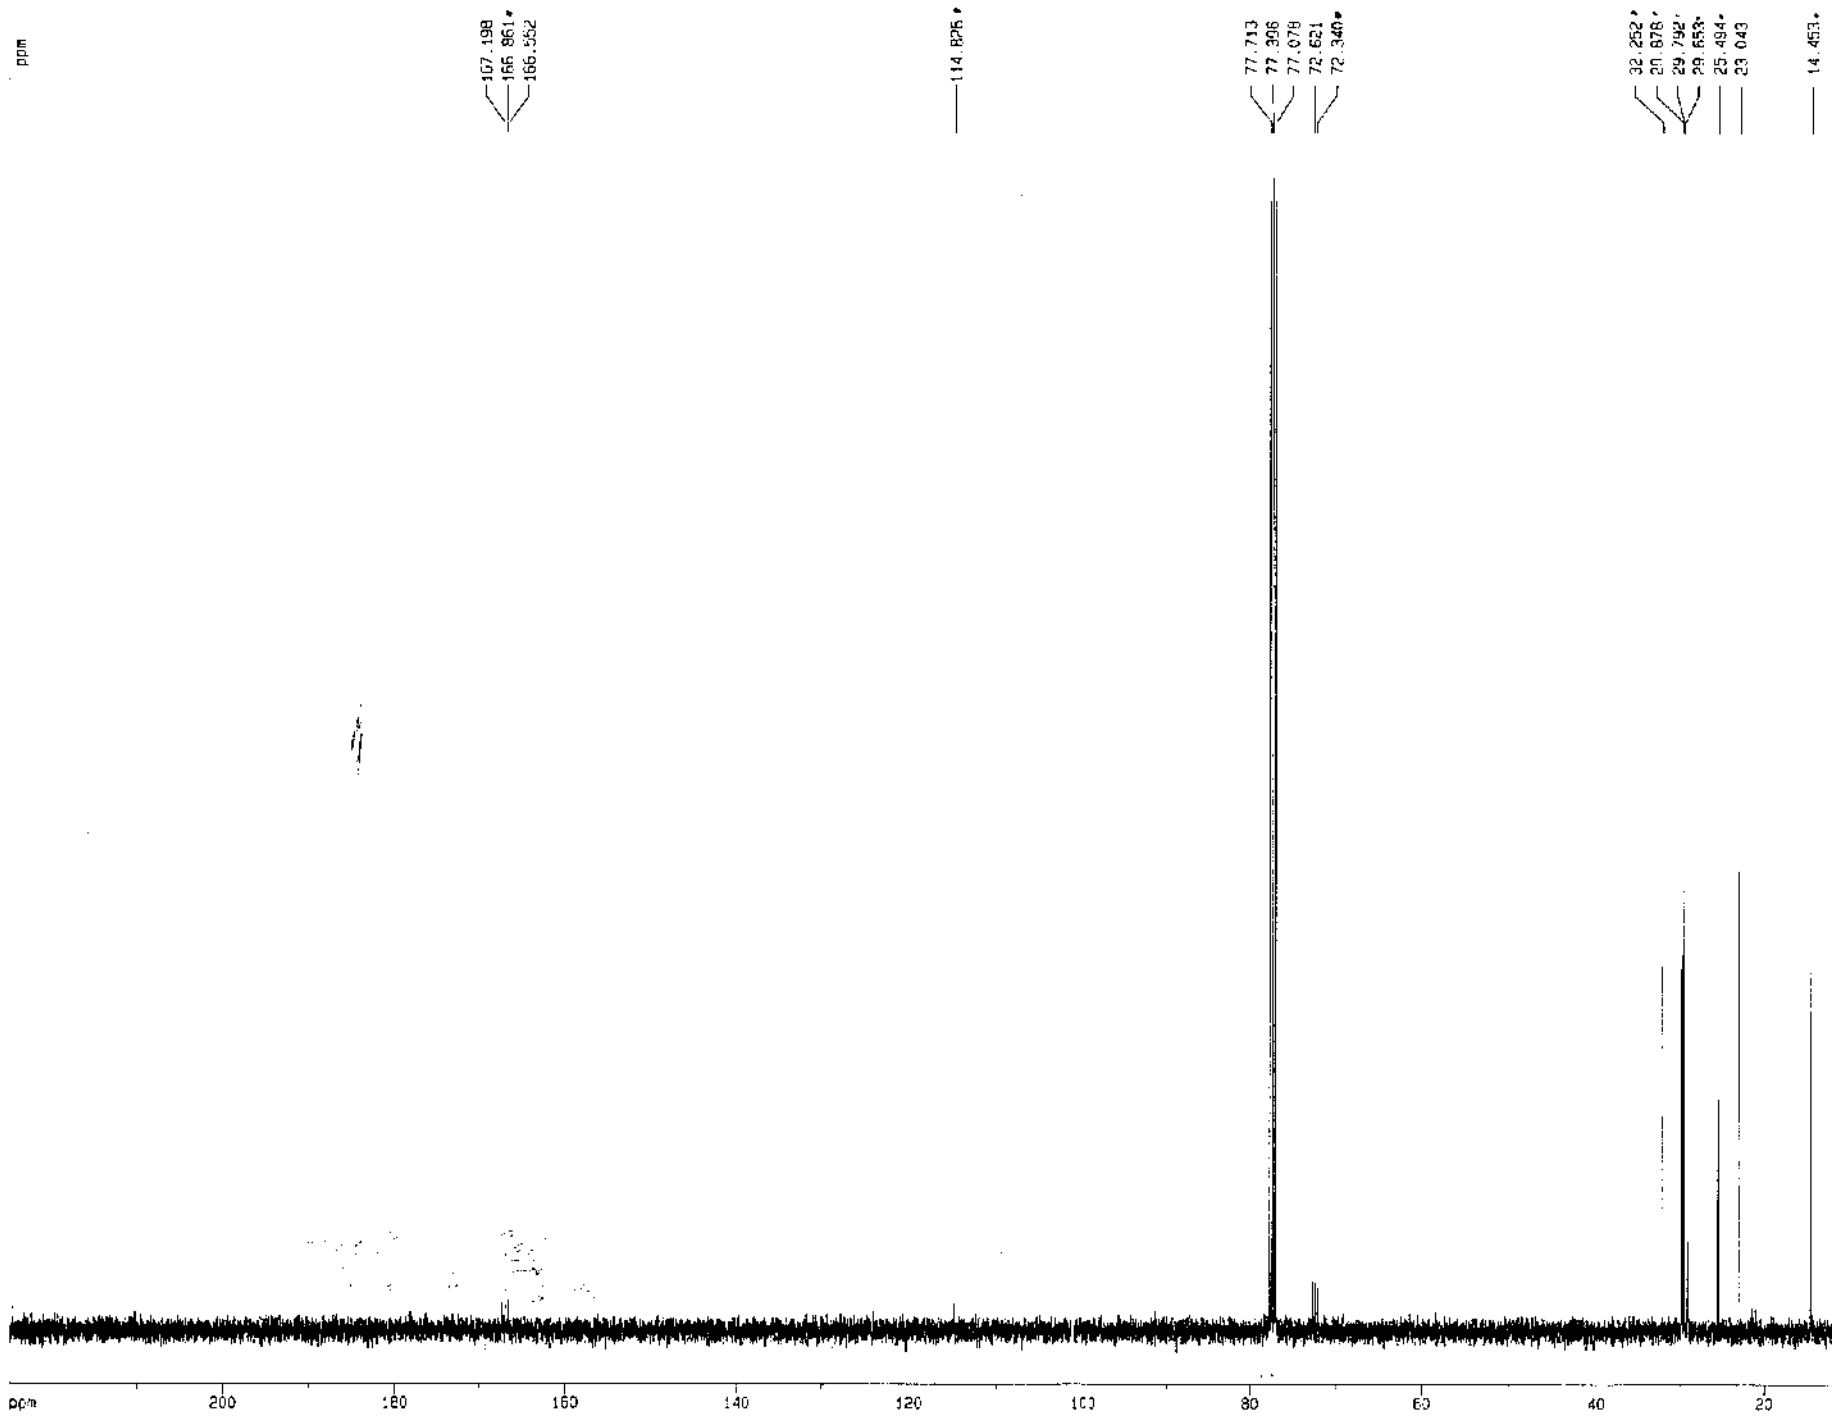

I-104/1

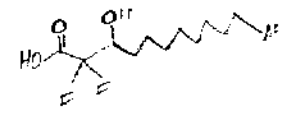

I-104/2  
recrystallized.

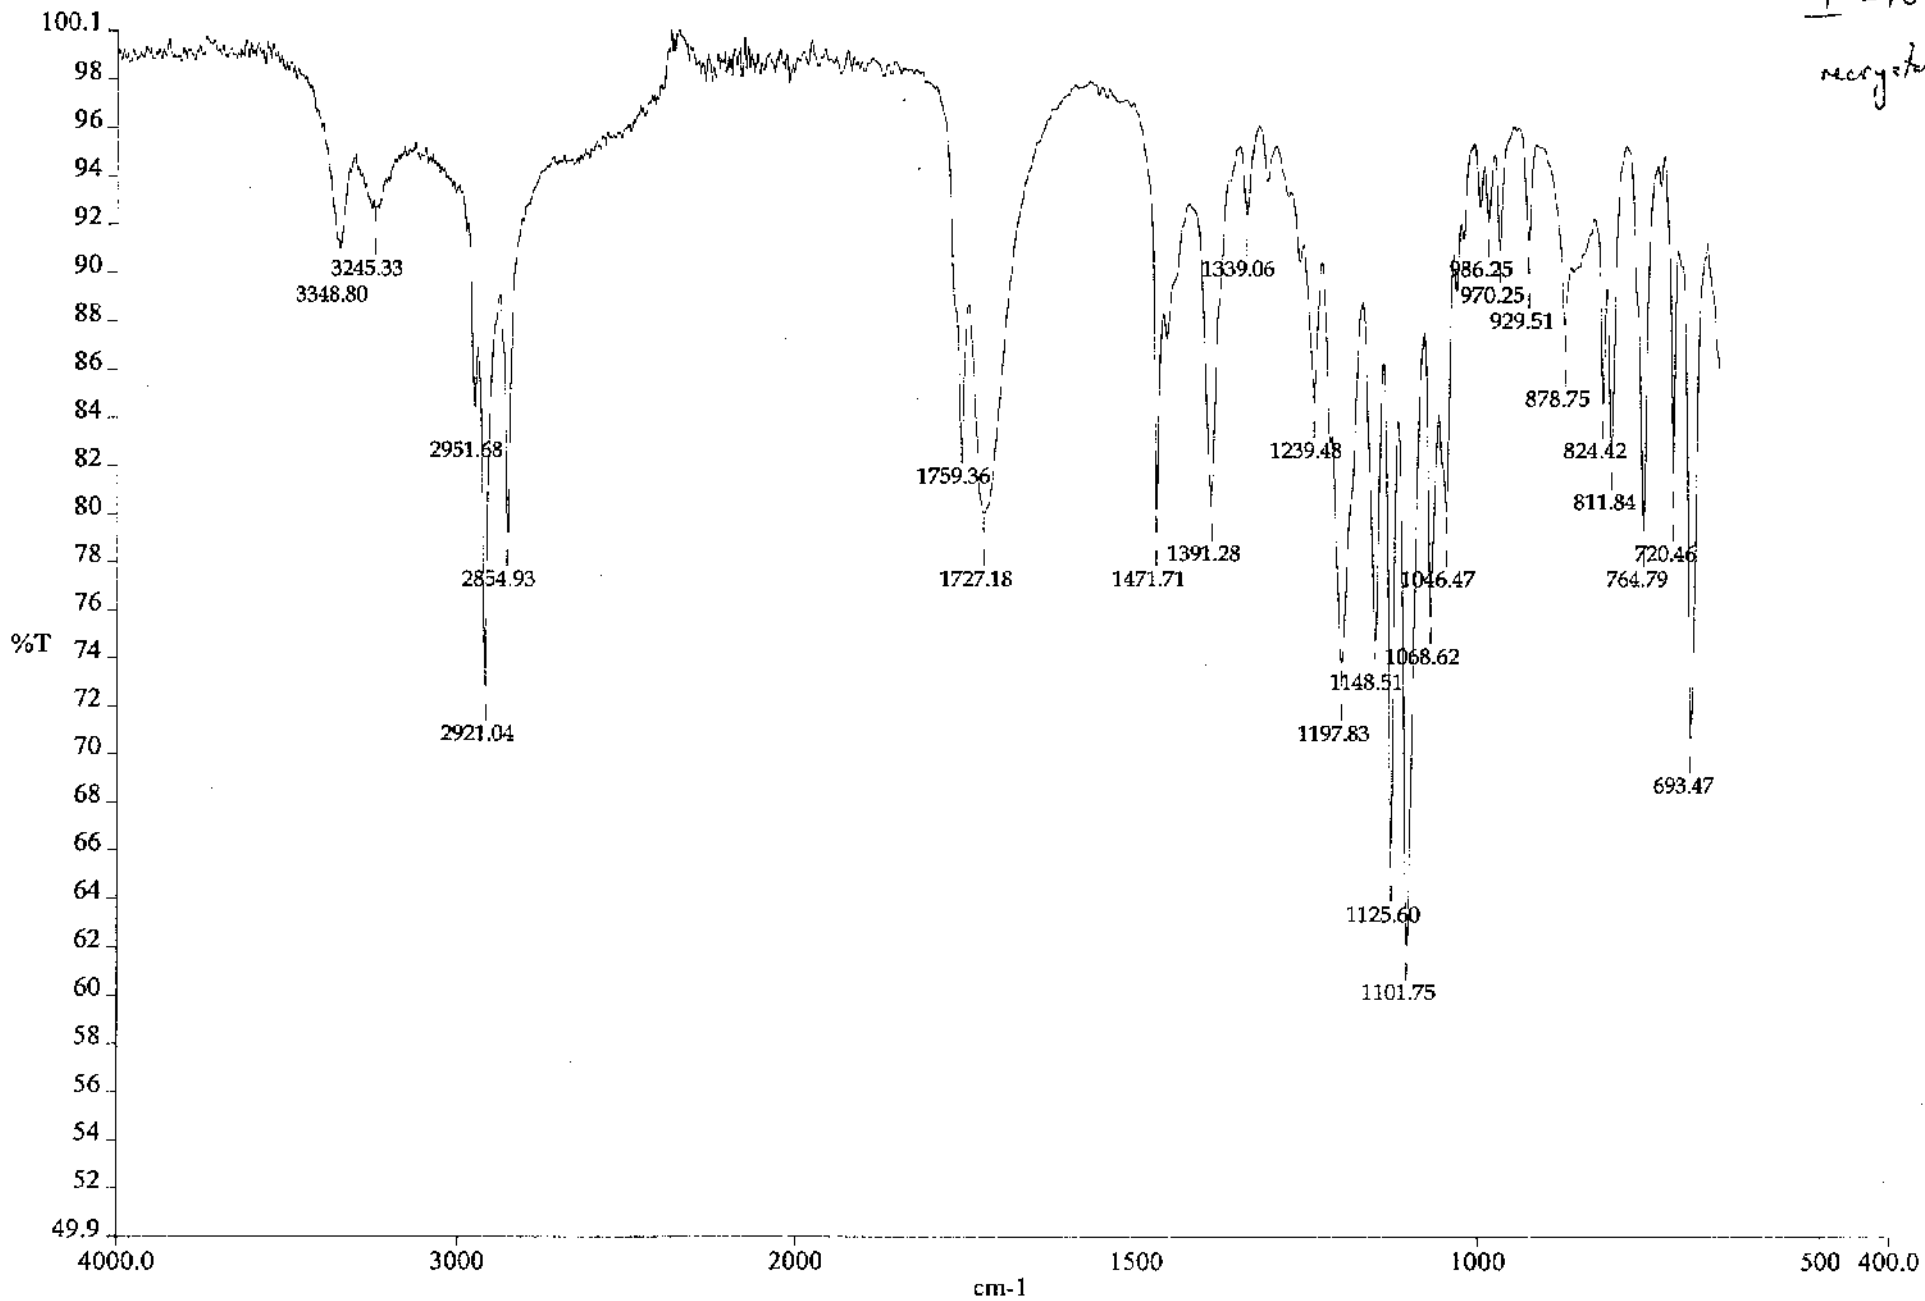

\_\_\_\_ drs.sp

## TLC TIME COURSE EXPERIMENT

Compound 2b (2 mg) in DMSO (100  $\mu$ l) was mixed with aqueous phosphate buffer (pH 7.0, 1 ml) and incubated at either 25  $^{\circ}$ C or 37  $^{\circ}$ C. Aliquots from the mixture were spotted onto a silica TLC plate at the times indicated after initial mixing. At 25  $^{\circ}$ C the starting material has almost completely disappeared after 2 hours and many spots appear, at 37  $^{\circ}$ C starting material has disappeared after 1.5 hours. Pencil circles were drawn around spots that quench the fluorescence of silica gel under UV light. After 3.5 hours at 37  $^{\circ}$ C the solution is cloudy and a red-brown immiscible oil has formed.

25  $^{\circ}$ C

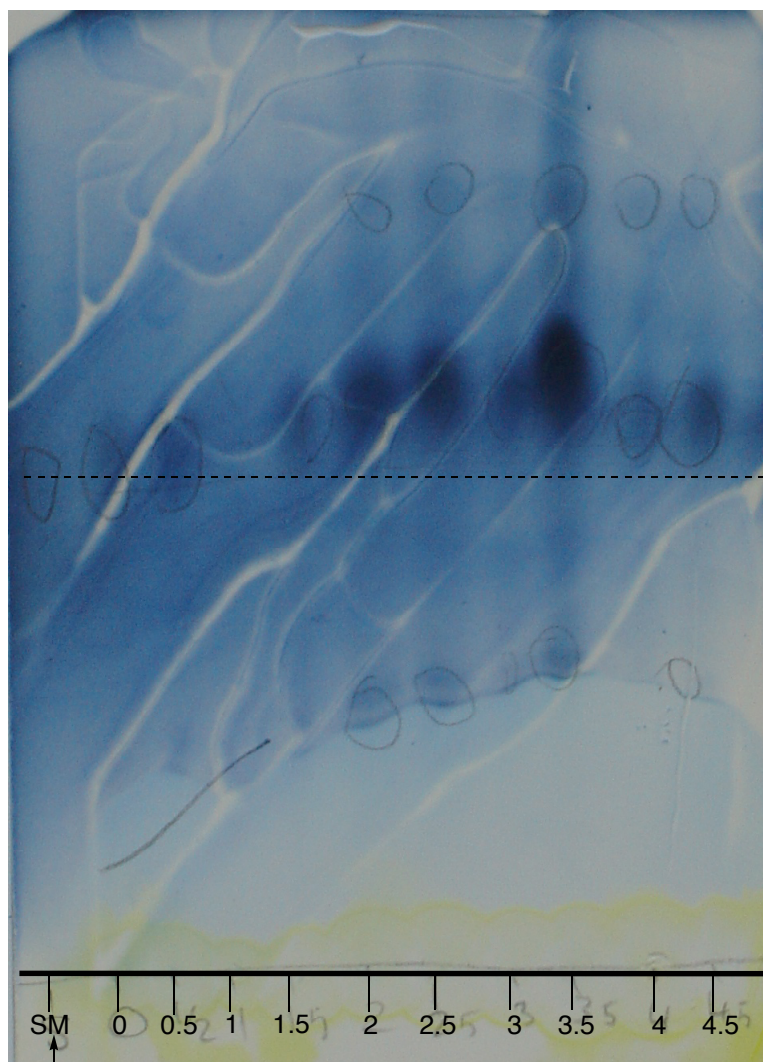

Time (h)

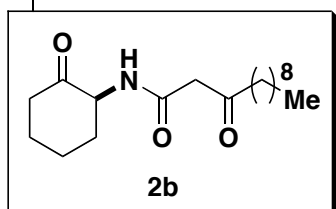

37  $^{\circ}$ C

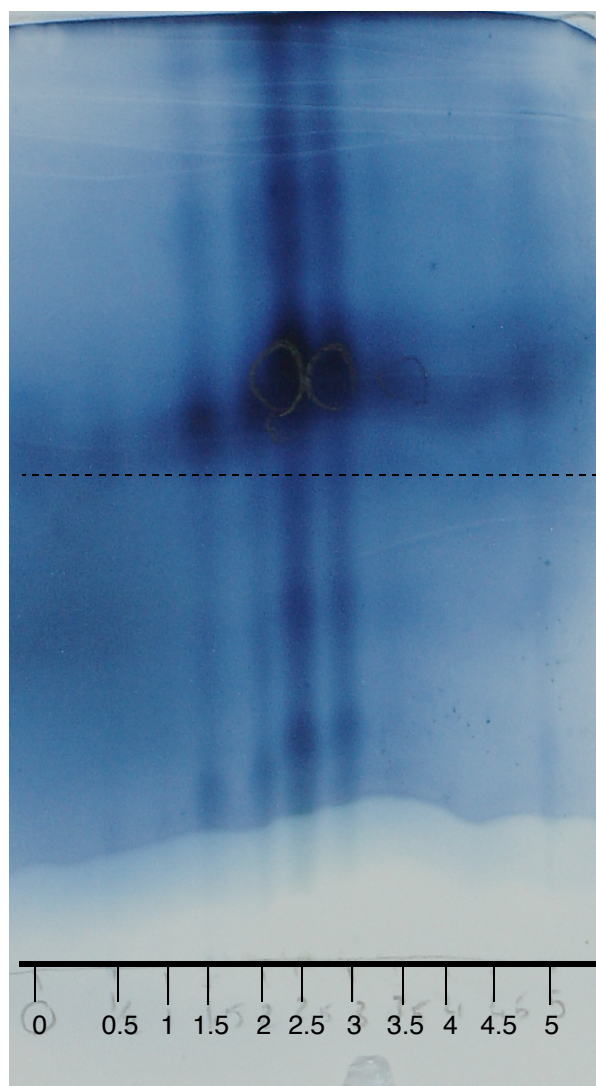

Time (h)

## Biochemistry Project

### 3-Oxo-dodecanoic acid methyl ester

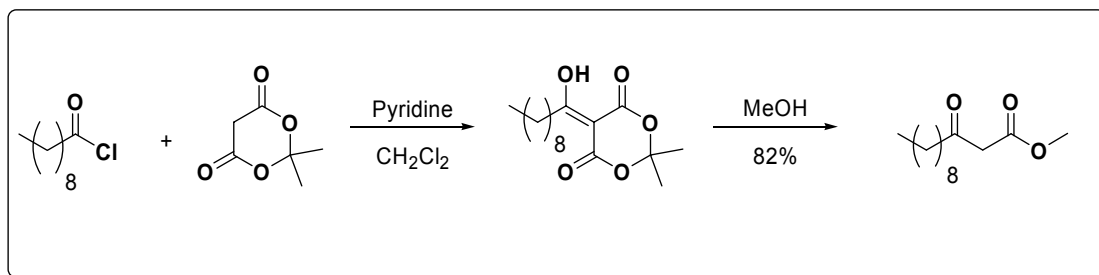

To a solution of Meldrums acid (2.0 g, 13.88 mmol) in CH<sub>2</sub>Cl<sub>2</sub> (20 ml) at 0 °C under nitrogen was added pyridine (2.24 ml, 27.76 mmol) dropwise over 20 minutes, followed by decanoyl chloride (3.16 ml, 15.26 mmol) and the reaction stirred for one hour at 0 °C and the allowed to warm to room temperature for one hour. The orange reaction was diluted with CH<sub>2</sub>Cl<sub>2</sub> (20 ml) and poured into ice and HCl (2 N, 20 ml). The organic layer was separated, washed with HCl, brine, dried (MgSO<sub>4</sub>) and the solvent removed in vacuo. The crude product was refluxed in methanol (55 ml) under nitrogen for 4 hours and then the solvent was removed in vacuo. The yellow oil was purified by vacuum distillation (125 °C, 2 mbar) and then column chromatography to yield the title compound as a colourless liquid (2.6 g, 82 %)

R<sub>f</sub> 0.31 (SiO<sub>2</sub>; 9:1 Hexane: Ethyl acetate);  $\nu_{max}$  (neat)/cm<sup>-1</sup> 1748s (ester), 1717 (ketone);  $\delta$ H (400 MHz; CDCl<sub>3</sub>) 3.76 (3H, s, OMe), 3.43 (2H, s, C(O)CH<sub>2</sub>C(O)), 2.53-2.49 (2H, t, *J* 7.5 Hz, CH<sub>2</sub>C(O)), 1.59-1.58 (2H, m, CH<sub>2</sub>CH<sub>2</sub>CH(O)), 1.35-1.2 (12H, br m, alkyl CH<sub>2</sub>), 0.88-0.84 (3H, t, *J* 6.5 Hz, CH<sub>3</sub>); LCMS (MeCN) 4.23 min, 229.1 (MH<sup>+</sup>)

Spectral data consistent with literature values<sup>1</sup>

**(2-Nonyl-[1,3]dioxolan-2-yl)-acetic acid methyl ester<sup>2</sup>:**

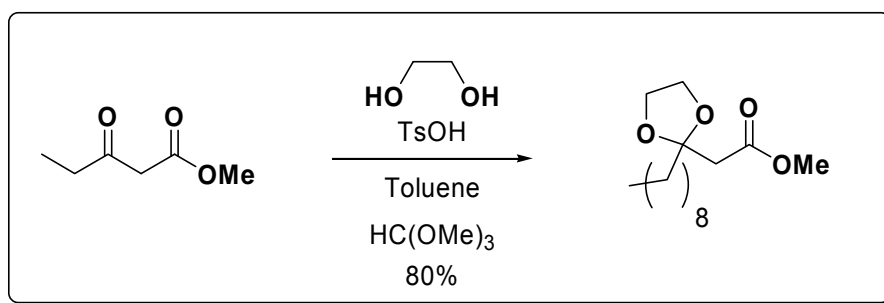

To a 3-Oxo-dodecanoic acid methyl ester (2.5 g, 10.96 mmol) and *para*-toluene sulfonic acid (0.19 g) was added methyl orthoformate (3.45 ml, 20 mmol) and ethylene glycol (2.9 ml, 52 mmol) under nitrogen. The reaction was stirred for 4 hours, until LCMS showed no starting material. The reaction was quenched by addition of 5% NaH<sub>2</sub>PO<sub>4</sub> solution (3 ml) and stirred for 15 minutes. Ether (100 ml) was added and the reaction washed with water, brine, dried (MgSO<sub>4</sub>) and purified by column chromatography to yield the title compound as a colourless oil (2.4 g, 80 %).

R<sub>f</sub> 0.34 (SiO<sub>2</sub>; 10:1 Hexane: Ethyl acetate);  $\nu_{max}$  (neat)/cm<sup>-1</sup> 1741s (ester), 1124s (C-O);  $\delta$ H (400 MHz; CDCl<sub>3</sub>) 4.00-3.82 (4H, m, OCH<sub>2</sub>CH<sub>2</sub>O), 3.68 (2H, s, CO<sub>2</sub>CH<sub>3</sub>), 2.65 (2H, s, CH<sub>2</sub>CO<sub>2</sub>CH<sub>3</sub>), 1.78-1.75 (2H, m, CH<sub>2</sub>), 1.40-1.30 (2H, br m, alkyl CH<sub>2</sub>), 1.30-1.20 (12H, br m, alkyl CH<sub>2</sub>), 0.88-0.84 (3H, t, J 6.5 Hz, CH<sub>3</sub>). LCMS 4.41 min, 273 (M+H)<sup>+</sup>

## (2-Nonyl-[1,3]dioxolan-2-yl)-acetic acid

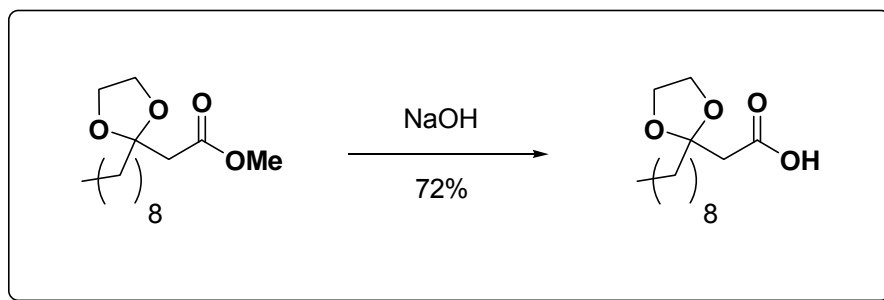

(2-Nonyl-[1,3]dioxolan-2-yl)-acetic acid methyl ester (1.0 g, 3.68 mmol) was stirred with 10% sodium hydroxide (1.47 ml, 3.68 mmol) for 3 hours. The reaction was monitored by TLC (10:1 hexane: ethyl acetate). The aqueous layer diluted with water (5 ml) and was washed with ether (x 3). The aqueous layer was acidified and extracted using ether (x 3). The organic layer was dried (MgSO<sub>4</sub>) and solvent removed in vacuo to yield the title compound as a white solid (683 mg, 72%)

$\nu_{max}$  (neat)/cm<sup>-1</sup> 1706s (ester) 1056s (C-O);  $\delta$ H (400 MHz; CDCl<sub>3</sub>) 4.06-3.98 (4H, m, OCH<sub>2</sub>CH<sub>2</sub>O), 2.70 (2H, s, CH<sub>2</sub>CO<sub>2</sub>H), 1.78-1.74 (2H, m, CH<sub>2</sub>), 1.40-1.30 (2H, br m, alkyl CH<sub>2</sub>), 1.30-1.20 (12H, br m, alkyl CH<sub>2</sub>), 0.88-0.85 (3H, t, J 7.0 Hz, CH<sub>3</sub>); LCMS 4.43 min 199 (M-57)<sup>+</sup>; mp 38-42°C.

## (2-Nonyl-[1,3]dioxolan-2-yl)-acetyl chloride

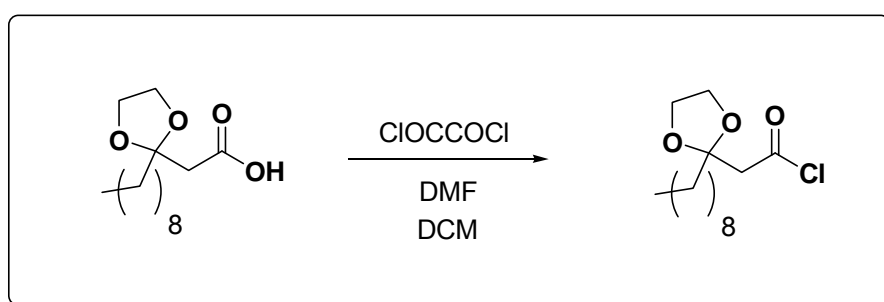

To a solution of (2-Nonyl-[1,3]dioxolan-2-yl)-acetic acid (600mg, 2.3 mmol) in CH<sub>2</sub>Cl<sub>2</sub> (5 ml) was added oxalyl chloride (0.31 ml, 3.5 mmol) and DMF (cat.) at 0 °C. The reaction was stirred for 30 minutes then put under nitrogen for 90

minutes. Solvent was removed *in vacuo* to yield (2-Nonyl-[1,3]dioxolan-2-yl)-acetyl chloride as a brown oil (655 mg, 100 %) which was used in the next reaction without purification.

$\delta$ H (400 MHz; CDCl<sub>3</sub>) 4.06-3.92 (4H, m, OCH<sub>2</sub>CH<sub>2</sub>O), 3.21 (2H, s, CH<sub>2</sub>COCl), 1.78-1.70 (2H, m, CH<sub>2</sub>), 1.35-1.20 (14H, br m, alkyl CH<sub>2</sub>), 0.88-0.80 (3H, t, *J* 6.5 Hz, CH<sub>3</sub>).

### General Amide Coupling:

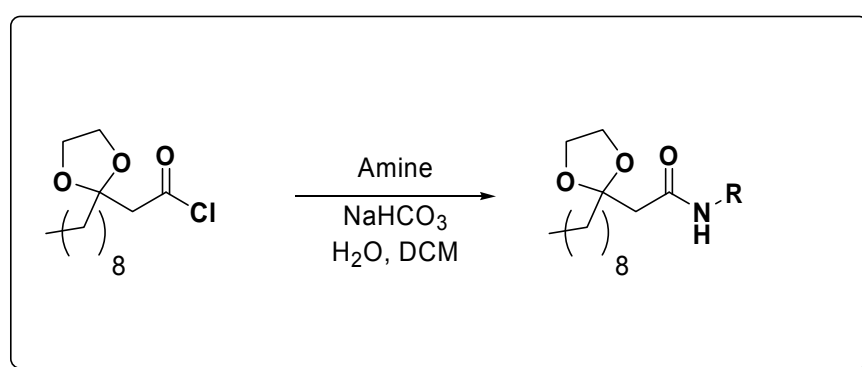

To a solution of the amine (1.5 equiv.) and sodium carbonate (3 equiv.) in water was added (2-Nonyl-[1,3]dioxolan-2-yl)-acetyl chloride (1 equiv.) in dry CH<sub>2</sub>Cl<sub>2</sub>. The reaction was stirred overnight and monitored by TLC. The organic layer was separated and washed with Na<sub>2</sub>CO<sub>3(aq)</sub> (x 2), Brine (x 2), dried (MgSO<sub>4</sub>) and solvent removed *in vacuo* to yield a brown solid.

### N-(2-Hydroxy-cyclohexyl)-2-(2-nonyl-[1,3]dioxolan-2-yl)-acetamide

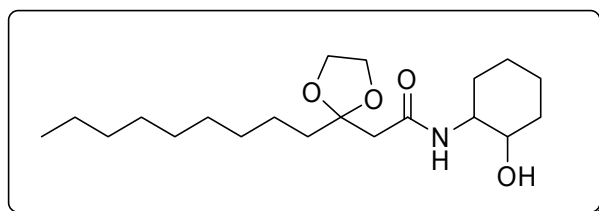

isolated as a white solid by recrystallisation from ether (400 mg, 60 %) *R*<sub>f</sub> 0.60 (SiO<sub>2</sub>; 10:1 Hexane: Ethyl acetate);  $\nu$ <sub>max</sub>

(neat)/cm<sup>-1</sup> 3440w (NH), 3356m (OH), 1641s (amide);  $\delta$ H (400 MHz; CDCl<sub>3</sub>) 6.41-6.35 (1H, d, *J* = 6.5 Hz, NH), 4.02-3.98 (4H, m, COCH<sub>2</sub>CH<sub>2</sub>CO), 3.67-3.59 (1H, m, ), 3.44-3.43 (1H, d, *J* = 4.0 Hz, ), 3.34-3.27 (1H, m, ), 2.63-2.55 (2H, d, *J* = 4.5 Hz, C(O)CH<sub>2</sub>), 2.07-2.00 (1H, m, ), 1.92-1.89 (1H, m, ), 1.74-

1.65 (4H, m, ), 1.36-1.34 (3H, m, alkyl CH<sub>2</sub>), 1.31-1.18 (14H, m, alkylCH<sub>2</sub>), 0.88-0.85 (3H, t, *J*=6.5 Hz, CH<sub>3</sub>); LCMS (MeCN) 4.11 min, 356 (M+H<sup>+</sup>).

### PCC oxidation

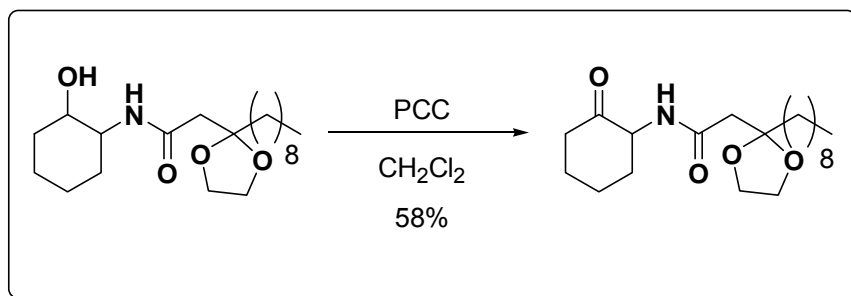

To a solution of N-(2-Hydroxy-cyclohexyl)-2-(2-nonyl-[1,3]dioxolan-2-yl)-acetamide (50 mg, 0.14 mmol) in CH<sub>2</sub>Cl<sub>2</sub> (1 ml) was added PCC (30 mg, 0.14 mmol), and the reaction stirred at room temperature under nitrogen for 4 hours, a further portion of PCC (30 mg, 0.14 mmol) was added and the reaction stirred overnight. The black gum was washed with ether and filtered through a pad of silica to yield a colourless oil, which was used in the next reaction without further purification.

R<sub>f</sub> 0.42 (SiO<sub>2</sub>; 1:2 hexane: ethyl acetate);  $\nu_{max}$  (neat)/cm<sup>-1</sup> 3377w (amide NH), 1719 (ketone), 1667 (amide), 1514 ( );  $\delta$ H (500 MHz; CDCl<sub>3</sub>) 9.40-9.22 (1H, br s, NH), 8.32-8.23 (1H, d, *J* 5.0 Hz, H4), 8.15-8.10 (1H, br d, *J* 8.0 Hz, H1), 7.71-7.65 (1H, dt, *J* 8.0, 1.5 Hz, H2), 7.05-7.01 (1H, m, H3), 3.56 (2H, s, H5), 2.58-2.46 (2H, t, *J* 7.5 Hz, H6), 1.64-1.54 (2H, m, H7), 1.33-1.17 (14H, m, alkyl CH<sub>2</sub>), 0.90-0.81 (3H, t, *J* 6.5 Hz, CH<sub>3</sub>); LCMS (MeCN) 4.49 min, 354 (MH<sup>+</sup>)

## General Procedure for Acetyl Deprotection

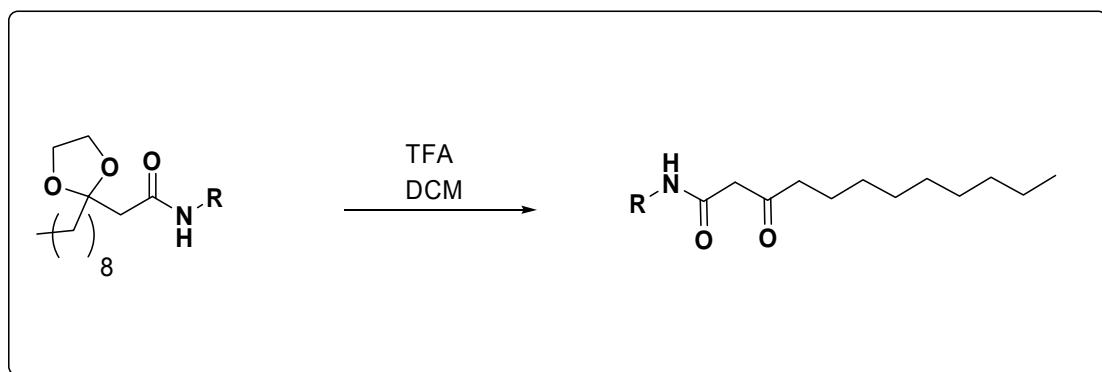

To a solution of the acetyl protected ketone (1 equiv.) in  $\text{CH}_2\text{Cl}_2$  was added TFA (95%), the yellow reaction was stirred for 2.5 hours and quenched using sodium bicarbonate solution. The aqueous layer was extracted using DCM (x 3) and the combined organic layers washed with brine (x 2), dried ( $\text{MgSO}_4$ ) and the solvent removed *in vacuo*. The crude product was purified by column chromatography to yield :

**N-(2-oxocyclohexyl)-3-oxododecamide** as a white solid (16 mg, 63 %).

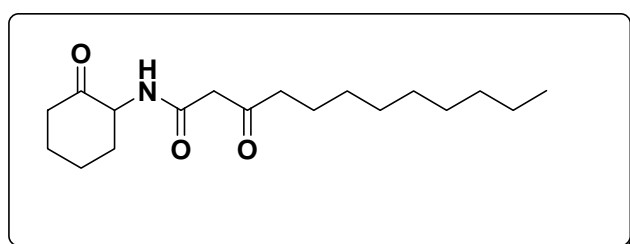

$R_f$  0.38 ( $\text{SiO}_2$ ; 1:2 hexane: ethyl acetate);  $\nu_{\text{max}}$  (neat)/ $\text{cm}^{-1}$   
3268w (amide NH), 1710  
(ketone), 1652 (amide), 1629  
(ketone), 1514;  $\delta_{\text{H}}$  (500 MHz;

$\text{CDCl}_3$ ) 7.53 (1H, br s, NH), 4.43-4.55 (1H, quintet,  $J$  6.0 Hz), 3.39 (2H, s), 2.56-2.66 (1H, m), 2.48-2.58 (3H, m), 2.33-2.43 (1H, dt,  $J$  13.5, 6.0 Hz), 2.07-2.11 (1H, m), 1.83-1.94 (1H, m), 1.71-1.82 (1H, m), 1.52-1.67 (3H, m), 1.33-1.44 (1H, dq,  $J$  12.5, 4.0 Hz), 1.19-1.33 (12H, m, alkyl  $\text{CH}_2$ ), 0.83-0.88 (3H, t,  $J$  7 Hz,  $\text{CH}_3$ );  $\delta_{\text{C}}$  (125 MHz,  $\text{CDCl}_3$ ) 207.33 (C), 206.28 (C), 165.75 (C), 58.61 (CH), 49.75 ( $\text{CH}_2$ ), 44.11 ( $\text{CH}_2$ ), 41.47 ( $\text{CH}_2$ ), 35.50 ( $\text{CH}_2$ ), 32.22 ( $\text{CH}_2$ ), 29.76 ( $\text{CH}_2$ ), 29.72 ( $\text{CH}_2$ ), 29.61 ( $\text{CH}_2$ ), 24.47 ( $\text{CH}_2$ ), 23.79 ( $\text{CH}_2$ ), 23.03 ( $\text{CH}_2$ ), 14.03 ( $\text{CH}_3$ ); LCMS (MeCN) 3.97 min, 310 ( $\text{MH}^+$ )<sup>3</sup>

- 1) Data agrees with literature values: Calvet S, David O, Vanucci-Bacqué C, Fargeau-Bellassoued MC, Lhommet G: **Chiral heterocyclic  $\beta$ -enamino esters: convenient synthesis and diastereoselective reduction** *Tetrahedron*. 2003, **59**:6333-6339
- 2) Pirrung MC, Liu H, Morehead AT; **Rhodium Chemzymes: Michaelis-Menten Kinetics in Dirhodium(II) Carboxylate-Catalyzed Carbenoid Reactions** *J.Amer.Chem.Soc.* 2002, **124**: 1014 - 1023.
- 3) Data agrees with literature values: Smith KM, Bu Y, Suga H: **Induction and inhibition of *Pseudomonas aeruginosa* Quorum Sensing by Synthetic Autoinducer Analogs** *Chem. Biol.* 2003, **10**:81-89

### 3-Oxo-dodecanoic acid (2-hydroxy-cyclohexyl)-amide

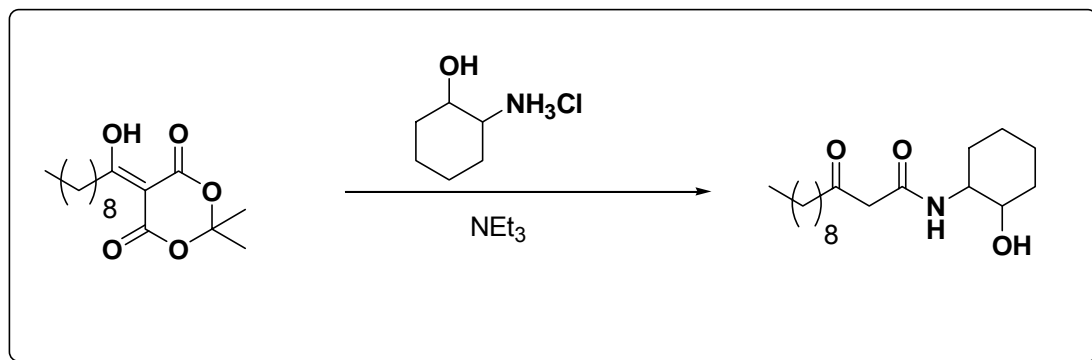

To a solution of acylated meldrums acid (1 g, 3 mmol) in toluene (50 ml) was added potassium carbonate (4.8 g, 30 mmol) and *trans*-2-aminocyclohexanol hydrogen chloride salt (4.0 g, 30 mmol). The reaction was heated to reflux under nitrogen for 1 hour. The reaction was cooled, reduced in vacuo and taken up in ethyl acetate. The organic layer was washed with sodium hydrogen carbonate solution, brine, dried (MgSO<sub>4</sub>) and reduced in vacuo to yield a yellow gum. The product was purified by column chromatography to yield:

**3-Oxo-dodecanoic acid (2-hydroxy-cyclohexyl)-amide:** as a white solid

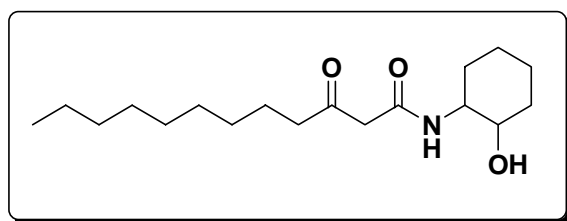

(514 mg, 19 %) R<sub>f</sub> 0.08 (SiO<sub>2</sub>; 10:1

CH<sub>2</sub>Cl<sub>2</sub>: ethyl acetate);  $\nu_{max}$

(neat)/cm<sup>-1</sup> 1718m (ketone) 1669m

(amide);  $\delta_H$  (500 MHz; CDCl<sub>3</sub>) 7.16-

7.15 (1H, br s, NH), 3.68-3.66 (1H,

m.), 3.44 (1H, s, C(O)CH<sub>2</sub>C(O)), 3.37-3.33 (2H, m), 2.55-2.52 (2H, t,  $J =$ ,

CH<sub>2</sub>C(O)), 2.06-2.04 (1H, m), 1.96-1.96 (1H, m), 1.76-1.71 (2H, m), 1.67-1.61

(2H, m), 1.40-1.22 (16H, m, alkyl CH<sub>2</sub>), 0.91-0.88 (3H, t,  $J = 6.5$  Hz, CH<sub>3</sub>);  $\delta_C$

(125 MHz, CDCl<sub>3</sub>) 207.43 (C), 167.24 (C), 75.27 (CH), 55.79 (CH), 48.36

(CH<sub>2</sub>), 44.00 (CH<sub>2</sub>), 36.83 (CH<sub>2</sub>), 34.51 (CH<sub>2</sub>), 34.30 (CH<sub>2</sub>), 31.84 (CH<sub>2</sub>),

31.58 (CH<sub>2</sub>), 31.26 (CH<sub>2</sub>), 29.37 (CH<sub>2</sub>), 29.36 (CH<sub>2</sub>), 29.32 (CH<sub>2</sub>), 29.22

(CH<sub>2</sub>), 28.98 (CH<sub>2</sub>), 25.73 (CH<sub>2</sub>), 24.54 (CH<sub>2</sub>), 23.96 (CH<sub>2</sub>), 23.37 (CH<sub>2</sub>),

22.64 (CH<sub>2</sub>), 14.08 (CH<sub>3</sub>); LCMS (MeCN) 5.79 min, 312 (MH<sup>+</sup>)

### 3-Oxo-dodecanoic acid 2-(3-oxo-dodecanoylamino)-cyclohexyl ester: as

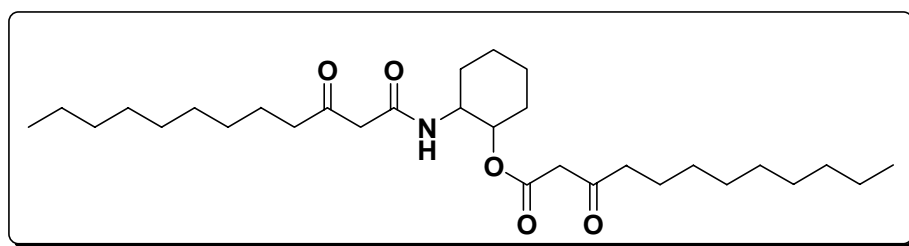

a yellow  
gum (2.5 g,  
45 %) Rf  
0.48 (SiO<sub>2</sub>;  
10:1

CH<sub>2</sub>Cl<sub>2</sub>: ethyl acetate);  $\nu_{max}$  (neat)/cm<sup>-1</sup> 1731m (ketone) 1634m (amide);  $\delta_H$  (500 MHz; CDCl<sub>3</sub>) 6.83-6.81 (1H, br d,  $J=8.0$  Hz, NH), 4.74-4.69 (1H, dd,  $J=10.5, 4.0$  Hz, CHNH), 3.92-3.87 (1H, m, CHOC(O)), 3.43-3.30 (4H, m, 2x C(O)CH<sub>2</sub>C(O)), 2.51-2.44 (4H, m, 2x CH<sub>2</sub>C(O)), 2.08-1.97 (3H, m), 1.74-1.67 (3H, m), 1.67-1.50 (3H, m), 1.32-1.16 (26H, m, alkyl CH<sub>2</sub>), 0.87-0.83 (6H, t,  $J=7.0$  Hz, 2x CH<sub>3</sub>); LCMS (MeCN) 6.81 min, 508 (MH<sup>+</sup>)

### Hydrolysis of 3-Oxo-dodecanoic acid 2-(3-oxo-dodecanoylamino)-cyclohexyl ester

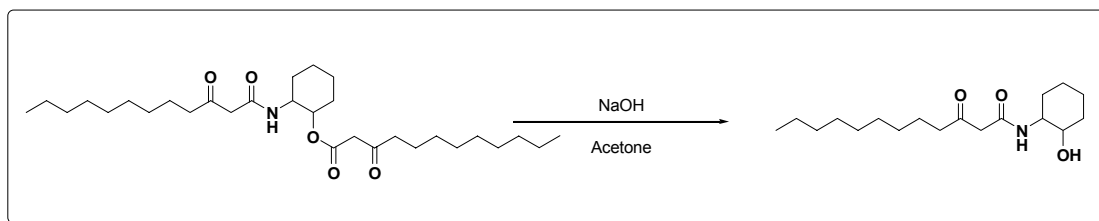

To a solution of 3-Oxo-dodecanoic acid 2-(3-oxo-dodecanoylamino)-cyclohexyl ester (50 mg, 98  $\mu$ mol) in acetone (0.5 ml) was added 10 % sodium hydroxide (8 ml) and the reaction stirred overnight. The reaction was extracted with ethyl acetate and the aqueous layer acidified, then extracted with ethyl acetate. The organic layer was dried (MgSO<sub>4</sub>) the product isolated as a cream solid. Data as above.

## PCC oxidation

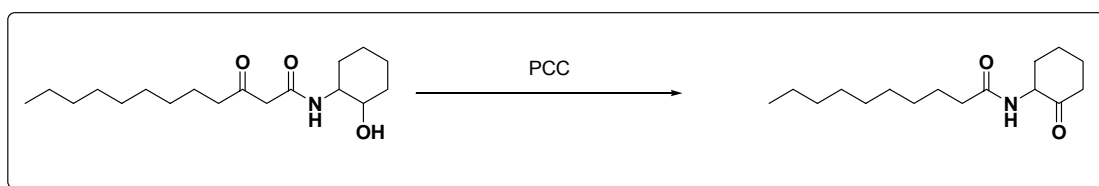

To a solution of 3-Oxo-dodecanoic acid (2-hydroxy-cyclohexyl)-amide (100 mg, 0.32 mmol) in  $\text{CH}_2\text{Cl}_2$  (5 ml) was added PCC (138 mg, 0.64 mmol), and the reaction stirred at room temperature under nitrogen for 18 hours. The black gum was washed with ether and filtered through a pad of silica to yield yellow oil, which was purified by column chromatography to yield Decanoic acid (2-oxo-cyclohexyl)-amide as a white solid (20 mg, 20 %)

$R_f$  0.28 ( $\text{SiO}_2$ ; 3:1  $\text{CH}_2\text{Cl}_2$ : ethyl acetate);  $\nu_{\text{max}}$  (neat)/ $\text{cm}^{-1}$  3298 (amide NH), 1707m (ketone) 1638m (amide);  $\delta_{\text{H}}$  (500 MHz;  $\text{CDCl}_3$ ) 6.38 (1H, br s, NH), 4.51-4.44 (1H, m, CHNH), 2.70-2.61 (1H, m), 2.54-2.47 (1H, m), 2.43-2.35 (1H, dt,  $J = 13.5, 6.0$  Hz), 2.21-2.16 (2H, t,  $J = 8.0$  Hz, C(O)CH<sub>2</sub>), 2.15-2.11 (1H, m), 1.88-1.80 (1H, m), 1.66-1.62 (3H, m), 1.33-1.26 (14H, m, alkyl CH<sub>2</sub>), 0.87-0.84 (3H, t,  $J 7.0$  Hz, CH<sub>3</sub>);  $\delta_{\text{C}}$  (125 MHz,  $\text{CDCl}_3$ ) 208.35 (C), 173.16 (C), 58.42 (CH), 41.56 (CH<sub>2</sub>), 37.10 (CH<sub>2</sub>), 36.03 (CH<sub>2</sub>), 32.24 (CH<sub>2</sub>), 29.81 (CH<sub>2</sub>), 27.97 (CH<sub>2</sub>), 29.62 (CH<sub>2</sub>), 26.06 (CH<sub>2</sub>), 24.43 (CH<sub>2</sub>), 23.04 (CH<sub>2</sub>), 14.47 (CH<sub>3</sub>); LCMS (MeCN) 6.05 min, 268 ( $\text{MH}^+$ ), HRMS found 290.23840  $\text{C}_{18}\text{H}_{30}\text{NO}_3\text{Na}$ , required 290.20960

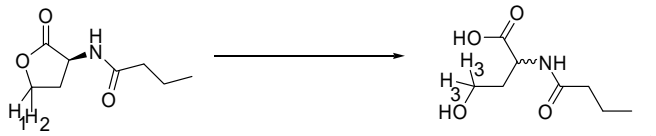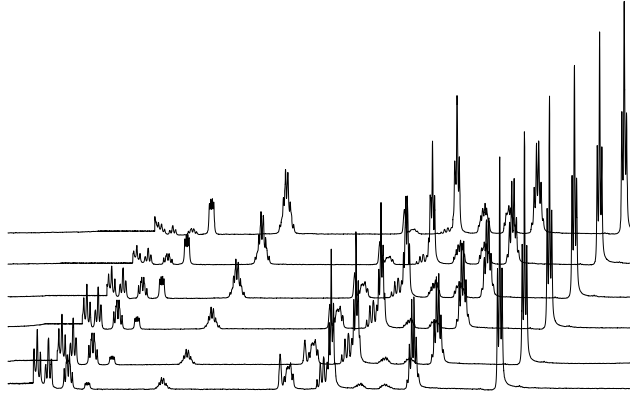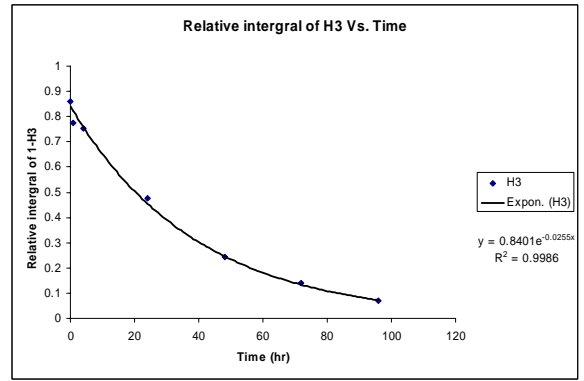

Half Life 20 hours

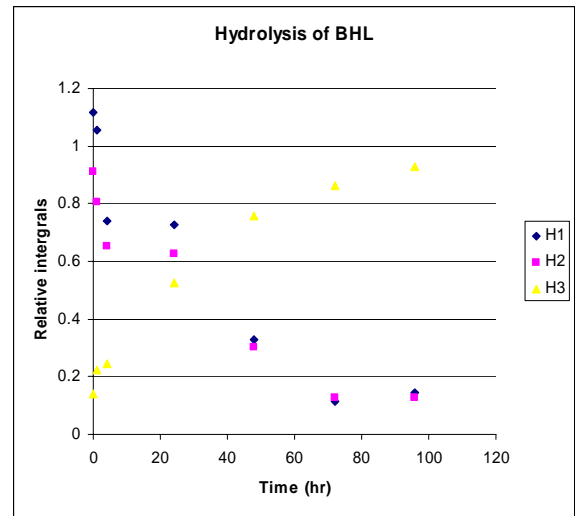

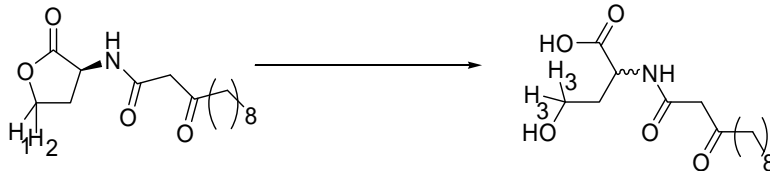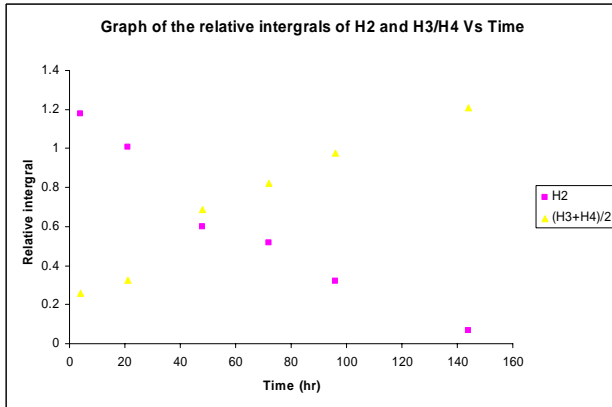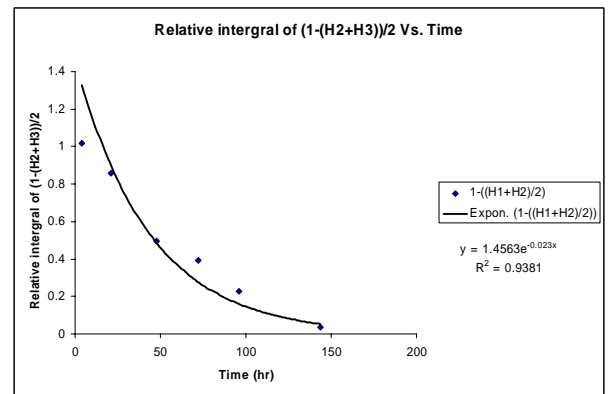

Half Life 46 hours

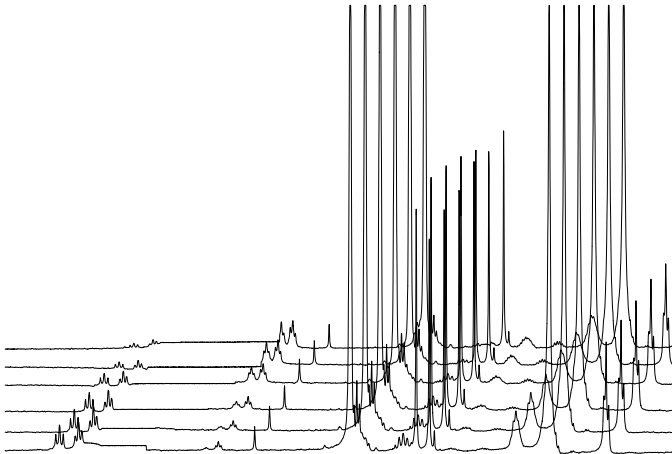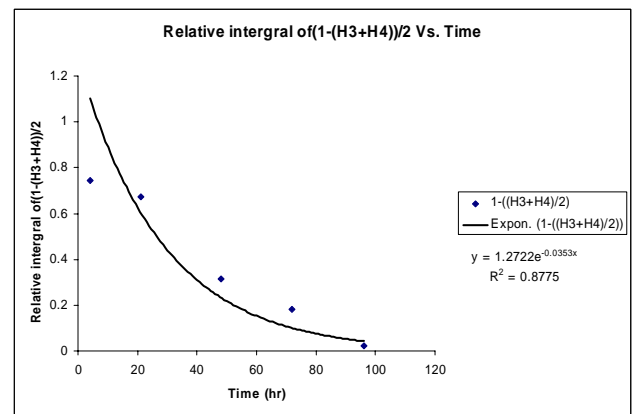

Half Life 31 hours

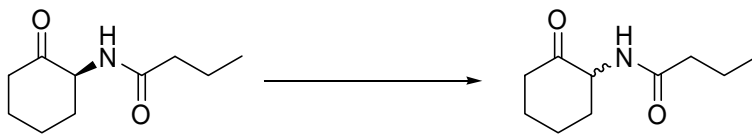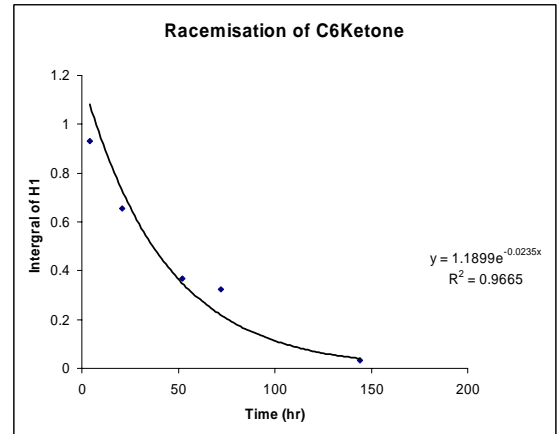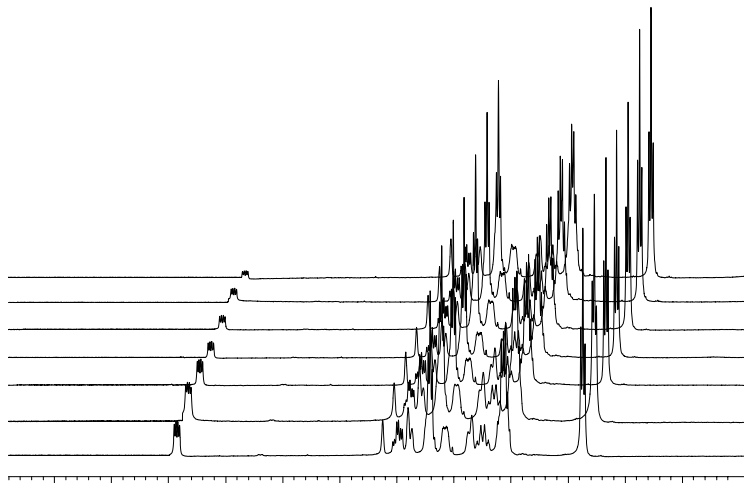

Half Life 37 hours

| Time | Integral of | 1    | 2    | 3    | 4 Relative intergrals |       |       |       | (1-H3)<br>H3 |        |        |
|------|-------------|------|------|------|-----------------------|-------|-------|-------|--------------|--------|--------|
|      |             |      |      |      | 1                     | 2     | 3     | 4     |              |        |        |
| Time |             |      |      |      | H1                    | H2    | H3    |       |              |        |        |
| 0    | 100         | 37.2 | 30.3 | 4.7  | 9.3                   | 1.116 | 0.909 | 0.141 | 0.279        | 0.1395 | 0.8605 |
| 1    | 100         | 35.2 | 26.9 | 7.3  | 14.9                  | 1.056 | 0.807 | 0.219 | 0.447        | 0.2235 | 0.7765 |
| 4    | 100         | 24.7 | 21.8 | 5.3  | 16.4                  | 0.741 | 0.654 | 0.159 | 0.492        | 0.246  | 0.754  |
| 24   | 100         | 24.3 | 20.9 | 18.8 | 35                    | 0.729 | 0.627 | 0.564 | 1.05         | 0.525  | 0.475  |
| 48   | 100         | 10.9 | 10.1 | 23.1 | 50.5                  | 0.327 | 0.303 | 0.693 | 1.515        | 0.7575 | 0.2425 |
| 72   | 100         | 3.8  | 4.2  | 24.8 | 57.4                  | 0.114 | 0.126 | 0.744 | 1.722        | 0.861  | 0.139  |
| 96   | 100         | 4.8  | 4.2  | 27.3 | 62                    | 0.144 | 0.126 | 0.819 | 1.86         | 0.93   | 0.07   |

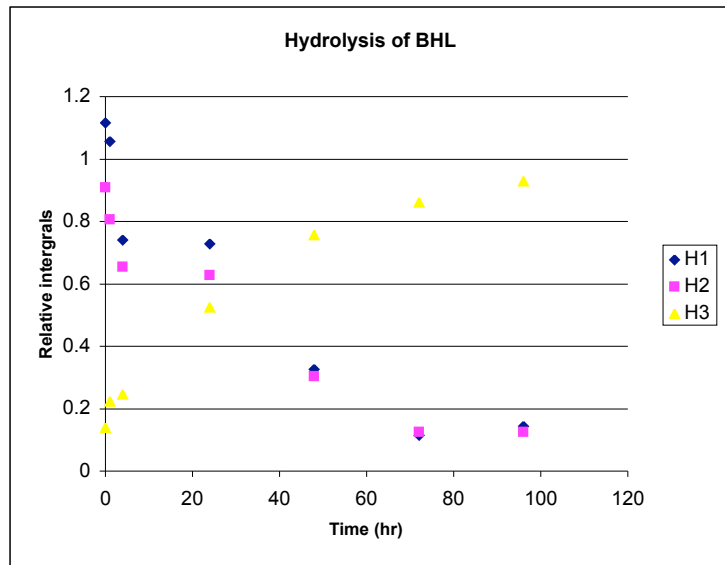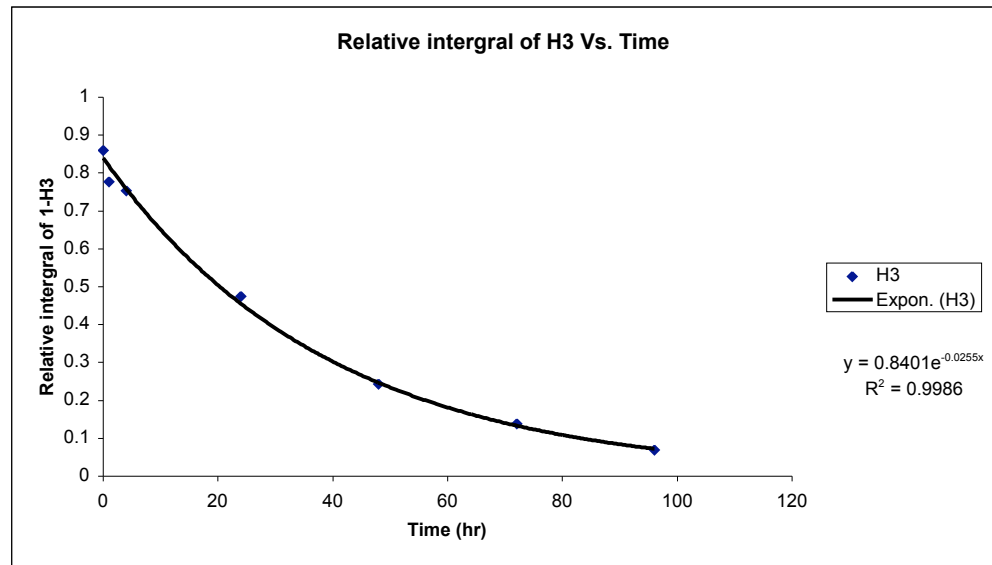

0.595167  
-0.518913  
Half Life 20.34952

| Time | Integral of | 4 Relative intergrals |      |      |      |       |       |       |       |           |               |               |
|------|-------------|-----------------------|------|------|------|-------|-------|-------|-------|-----------|---------------|---------------|
|      |             | 1                     | 2    | 3    | 4    | 1     | 2     | 3     | 4     | (H3+H4)/2 | 1-((H3+H4)/2) | 1-((H1+H2)/2) |
| Time | H1          | H2                    | H3   | H4   | H1   | H2    | H3    | H4    |       |           |               |               |
| 4    | 100         | 28.7                  | 39.2 | 6.1  | 11   | 0.861 | 1.176 | 0.183 | 0.33  | 0.2565    | 0.7435        | 1.0185        |
| 21   | 100         | 23.5                  | 33.5 | 9    | 12.7 | 0.705 | 1.005 | 0.27  | 0.381 | 0.3255    | 0.6745        | 0.855         |
| 48   | 100         | 13                    | 20   | 21.1 | 24.7 | 0.39  | 0.6   | 0.633 | 0.741 | 0.687     | 0.313         | 0.495         |
| 72   | 100         | 8.9                   | 17.3 | 26.2 | 28.4 | 0.267 | 0.519 | 0.786 | 0.852 | 0.819     | 0.181         | 0.393         |
| 96   | 100         | 4.3                   | 10.7 | 30.6 | 34.5 | 0.129 | 0.321 | 0.918 | 1.035 | 0.9765    | 0.0235        | 0.225         |
| 144  | 100         | 0.1                   | 2.3  | 39.8 | 40.7 | 0.003 | 0.069 | 1.194 | 1.221 | 1.2075    | -0.2075       | 0.036         |

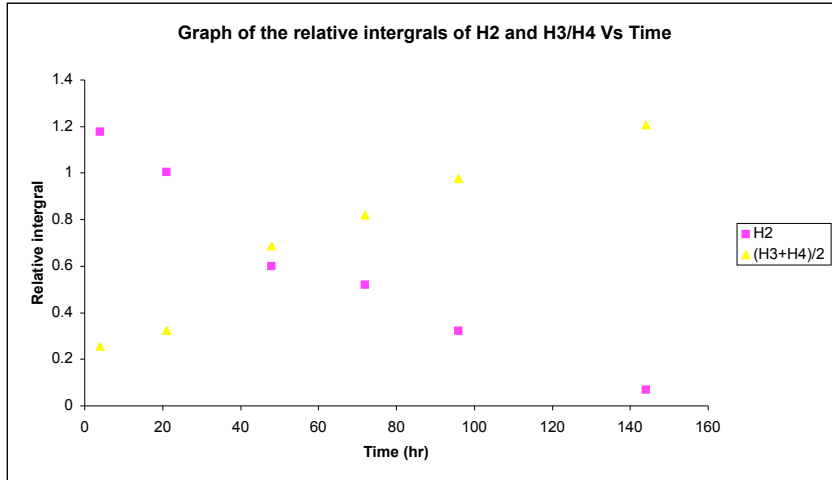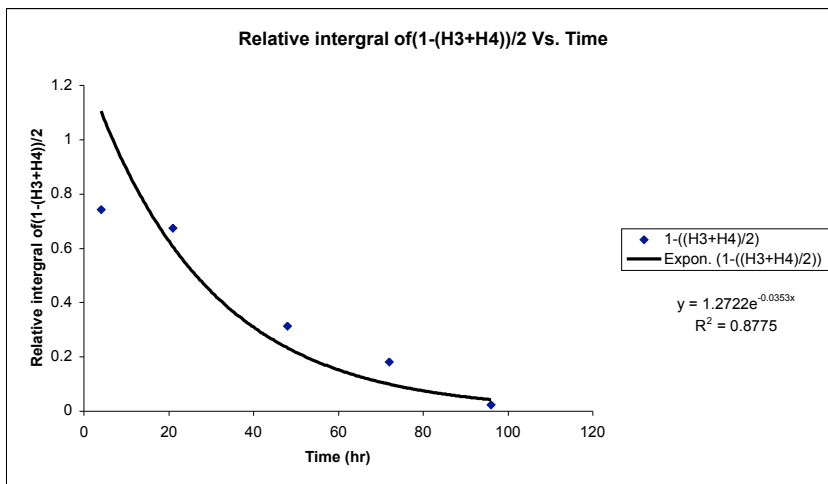

0.4560795  
-0.785088  
31.403522

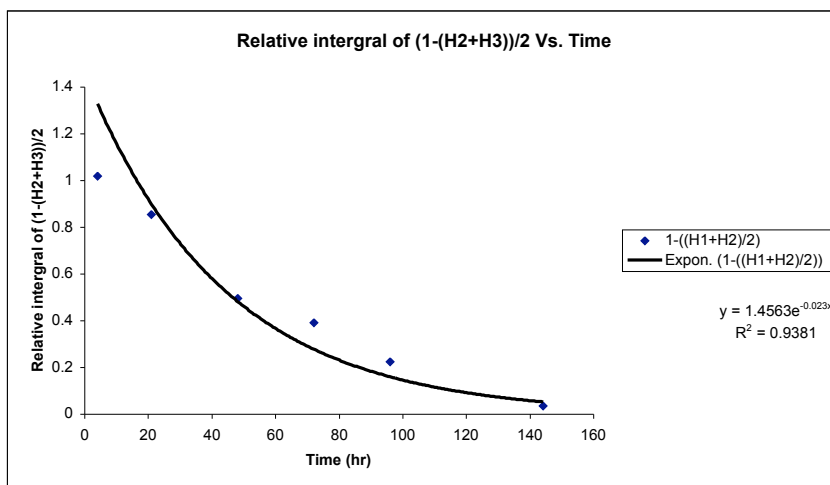

0.3433359  
-1.069046  
46.480268

| Time | Integral of | 1    | 2 | 3 | 4 | Relative intergrals<br>1 |
|------|-------------|------|---|---|---|--------------------------|
| 0    | 100         | 27.6 |   |   |   | 0.828                    |
| 4    | 100         | 31.1 |   |   |   | 0.933                    |
| 21   | 100         | 21.9 |   |   |   | 0.657                    |
| 52   | 100         | 12.3 |   |   |   | 0.369                    |
| 72   | 100         | 10.8 |   |   |   | 0.324                    |
| 144  | 100         | 1.1  |   |   |   | 0.033                    |

Racemisation

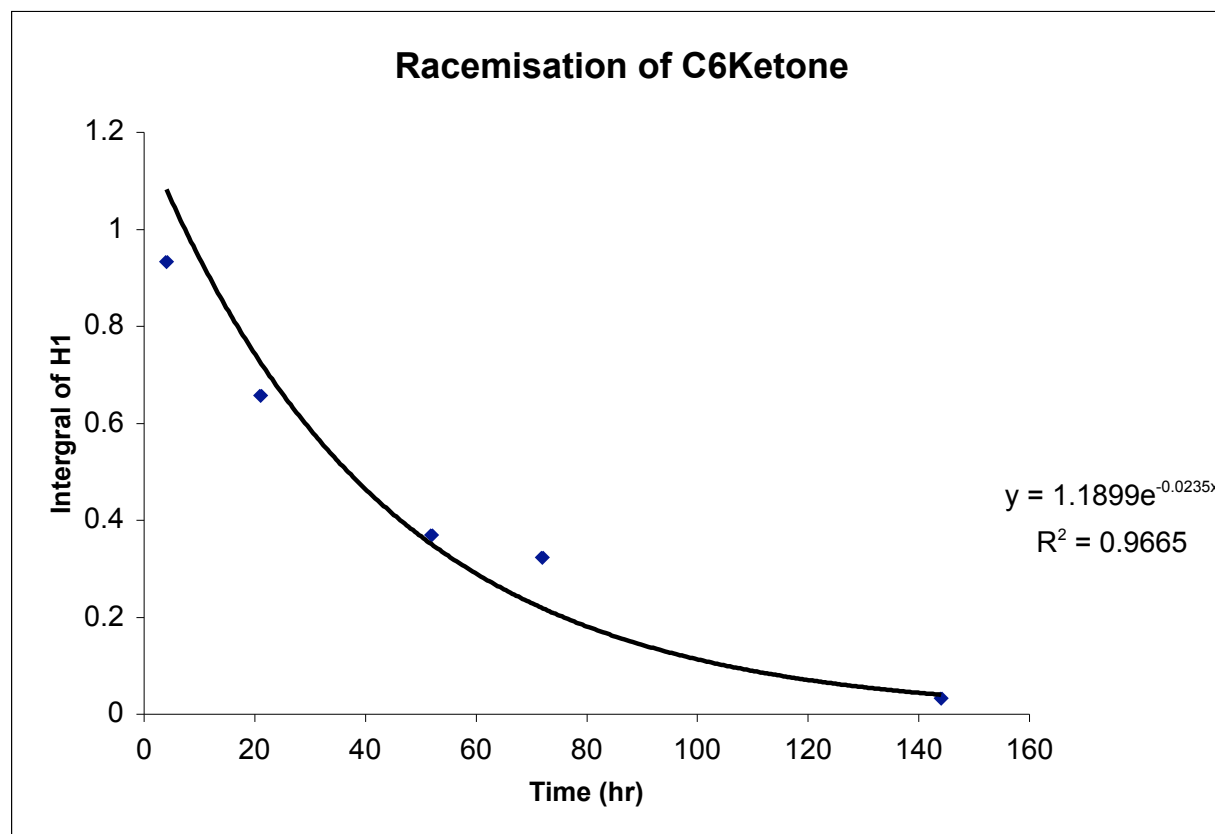

0.420203  
-0.86702  
Half Life 36.89432

## *Pseudomonas aeruginosa* Pigmentation Assay

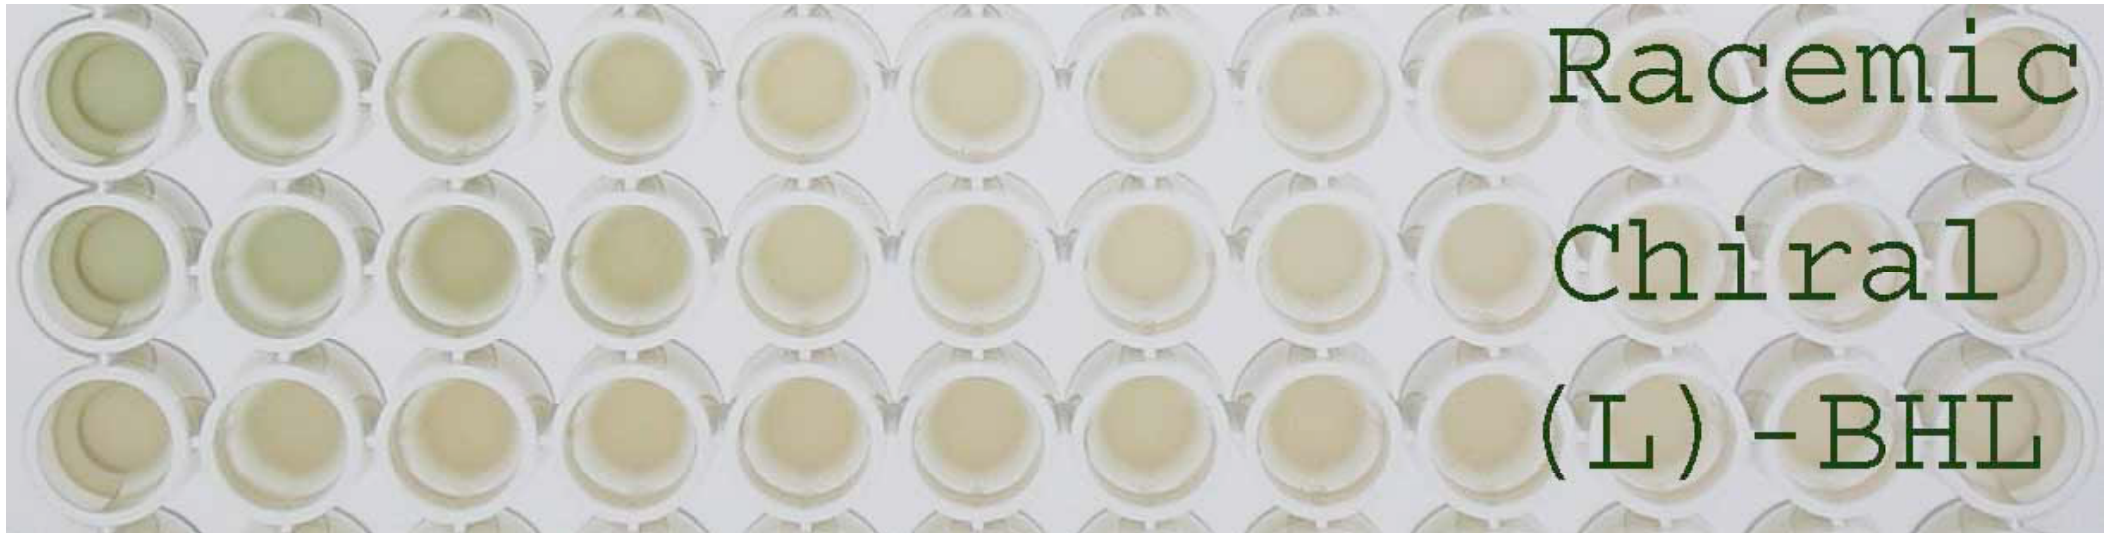

PAO-JP2 incubated at 37 °C for 48 h with the starting concentration of each compound at 500  $\mu\text{M}$ , and each step to the right the sample is diluted 2-fold. OddHL is present at a constant concentration of 10  $\mu\text{M}$ .
